# Supplementary material for: Organocatalytic asymmetric cyanation of isatin derived N-Boc ketoimines
Source: Royal Society of Chemistry journal article supplement (doi:10.1039/c2cc36665g), 2012-10-09

## Organocatalytic asymmetric cyanation of isatin derived *N*-Boc ketoimines

Yun-Lin Liu and Jian Zhou\*

Shanghai Key Laboratory of Green Chemistry and Chemical Processes, Department of Chemistry,  
East China Normal University, 3663N Zhongshan Road, Shanghai 200062, China,

*E-mail: jzhou@chem.ecnu.edu.cn*

### Supporting Information

#### (Part II)

| Content                                                                                              | Page         |
|------------------------------------------------------------------------------------------------------|--------------|
| <b><sup>1</sup>H and <sup>13</sup>C NMR spectra of product 9a-f</b>                                  | <b>2-37</b>  |
| <b><sup>1</sup>H and <sup>13</sup>C NMR spectra of product 10, 13, 14b, 8c, 9c, spirohydantoin I</b> | <b>38-51</b> |

<sup>1</sup>H, <sup>13</sup>C NMR and <sup>19</sup>F NMR spectra were recorded on 400 MHz. Chemical shifts are reported in ppm from CDCl<sub>3</sub>, (CD<sub>3</sub>)<sub>2</sub>SO or D<sub>2</sub>O with the solvent resonance as the internal standard. The following abbreviations were used to designate chemical shift multiplicities: s = singlet, d = doublet, t = triplet, q = quartet, h = heptet, m = multiplet, br = broad. Coupling constants, *J*, are reported in Hertz.

7.846  
7.829  
7.456  
7.453  
7.436  
7.434  
7.417  
7.414  
7.260  
7.204  
7.202  
7.185  
7.183  
7.166  
7.164  
6.913  
6.893  
— 5.510

— 3.287

1.579  
1.415  
1.251

— -0.003

1y1-11-091 h

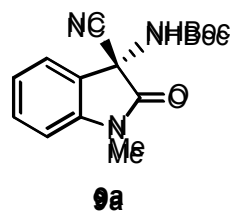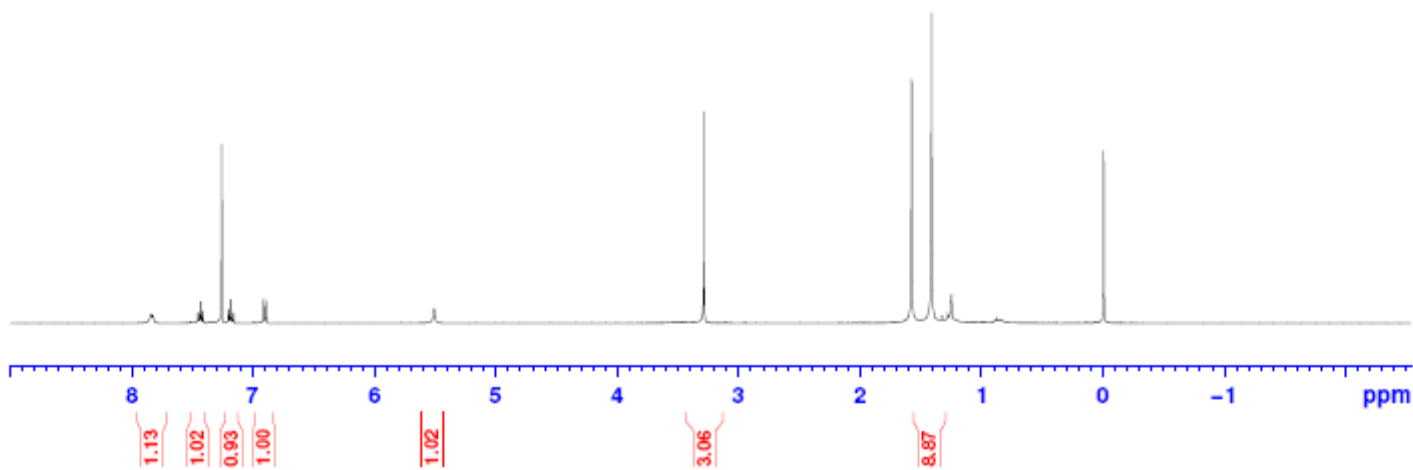

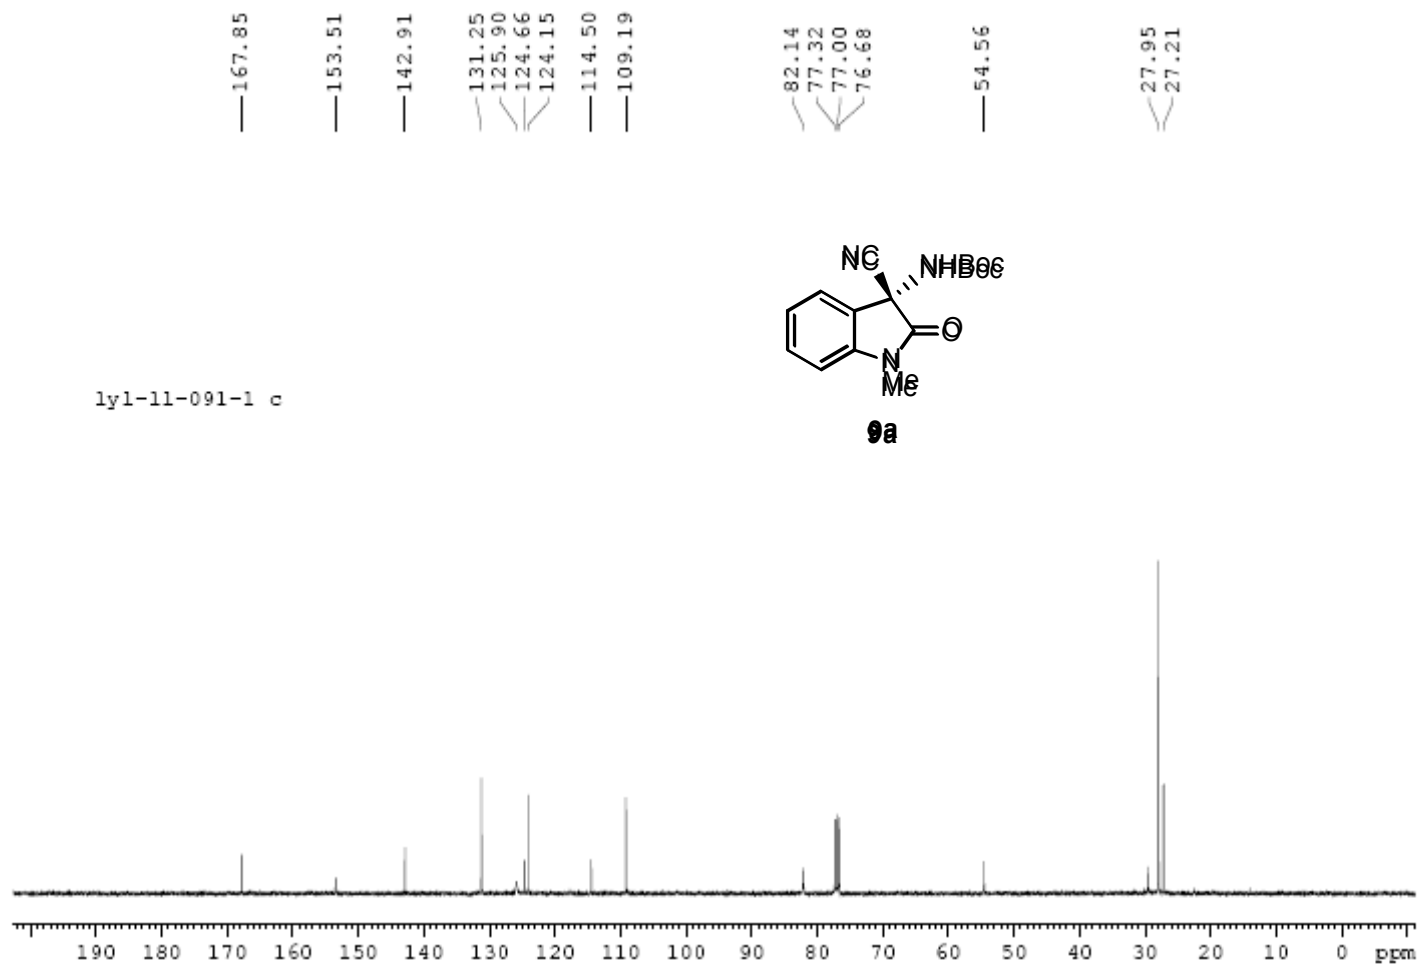

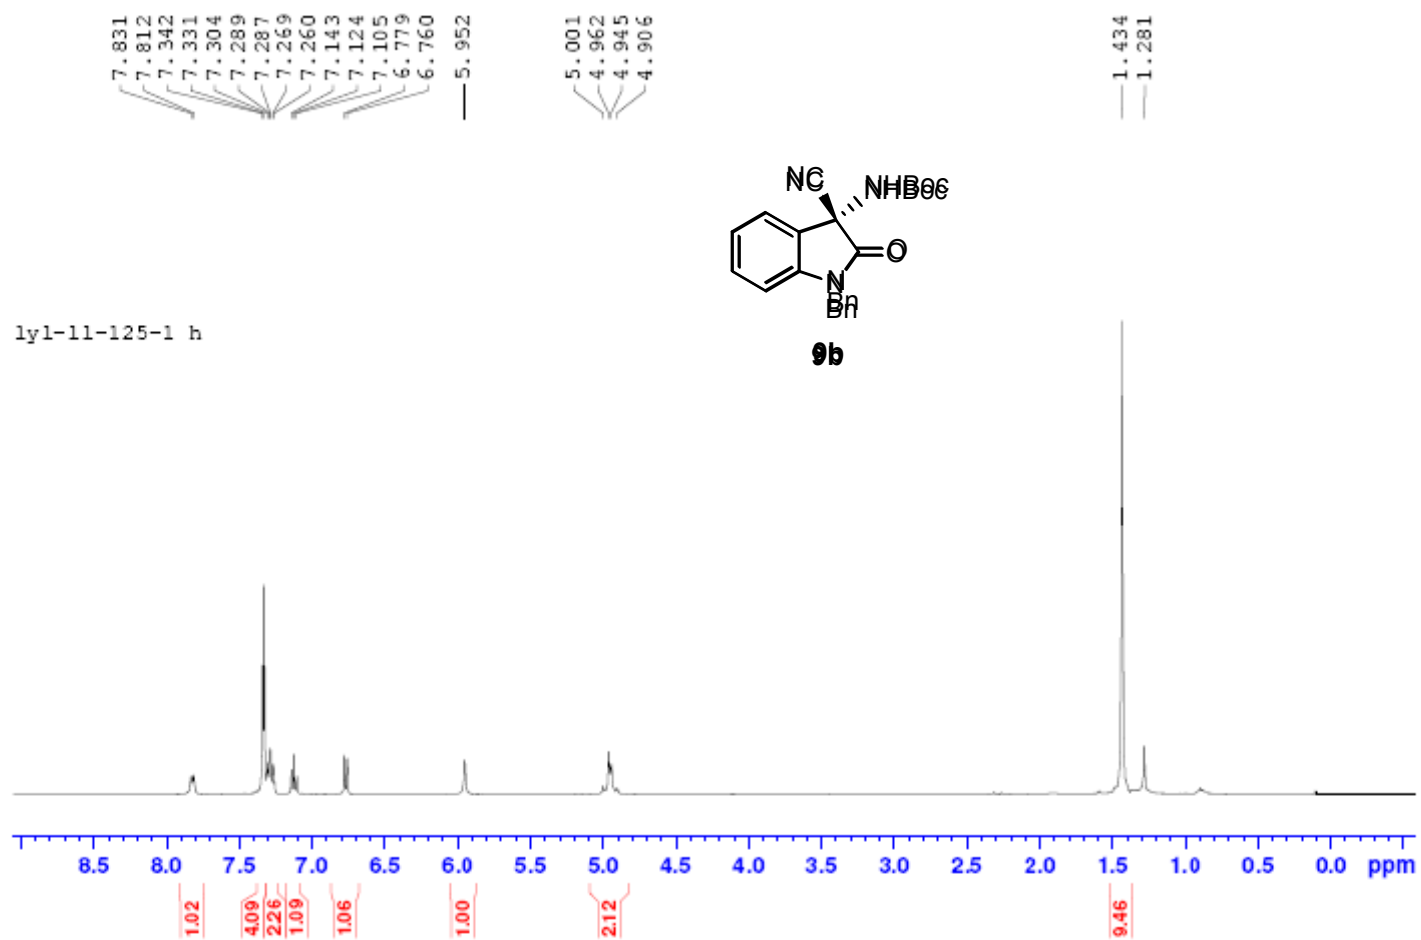

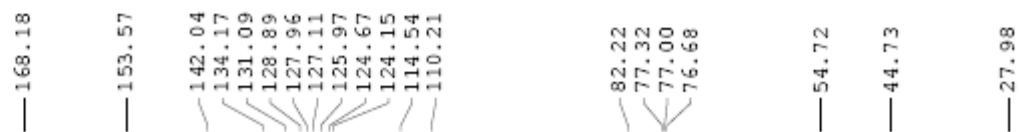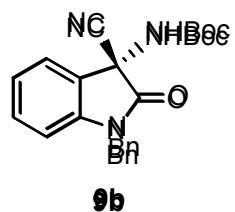

ly1-11-125-1 c

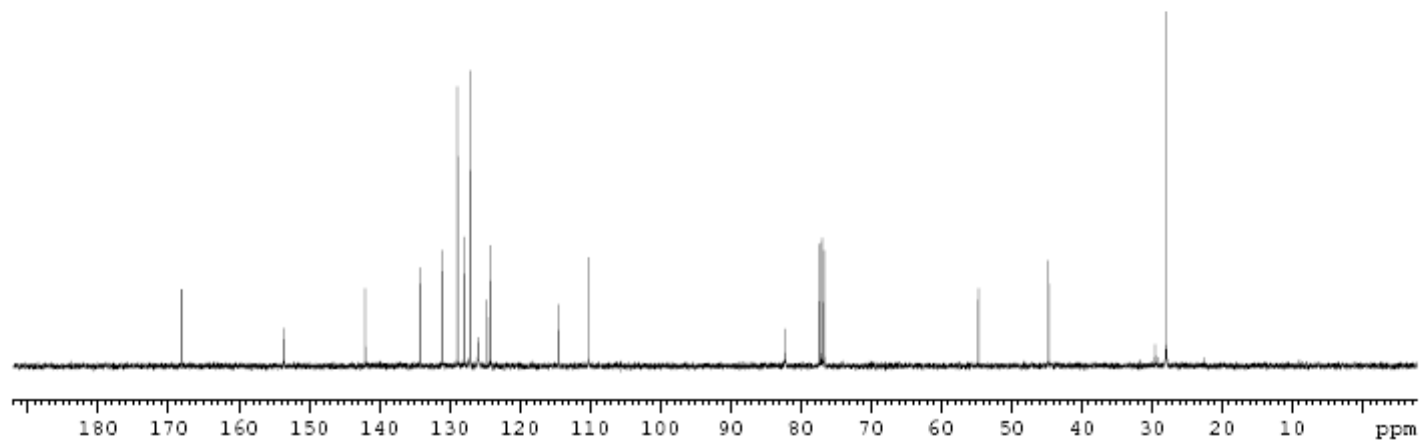

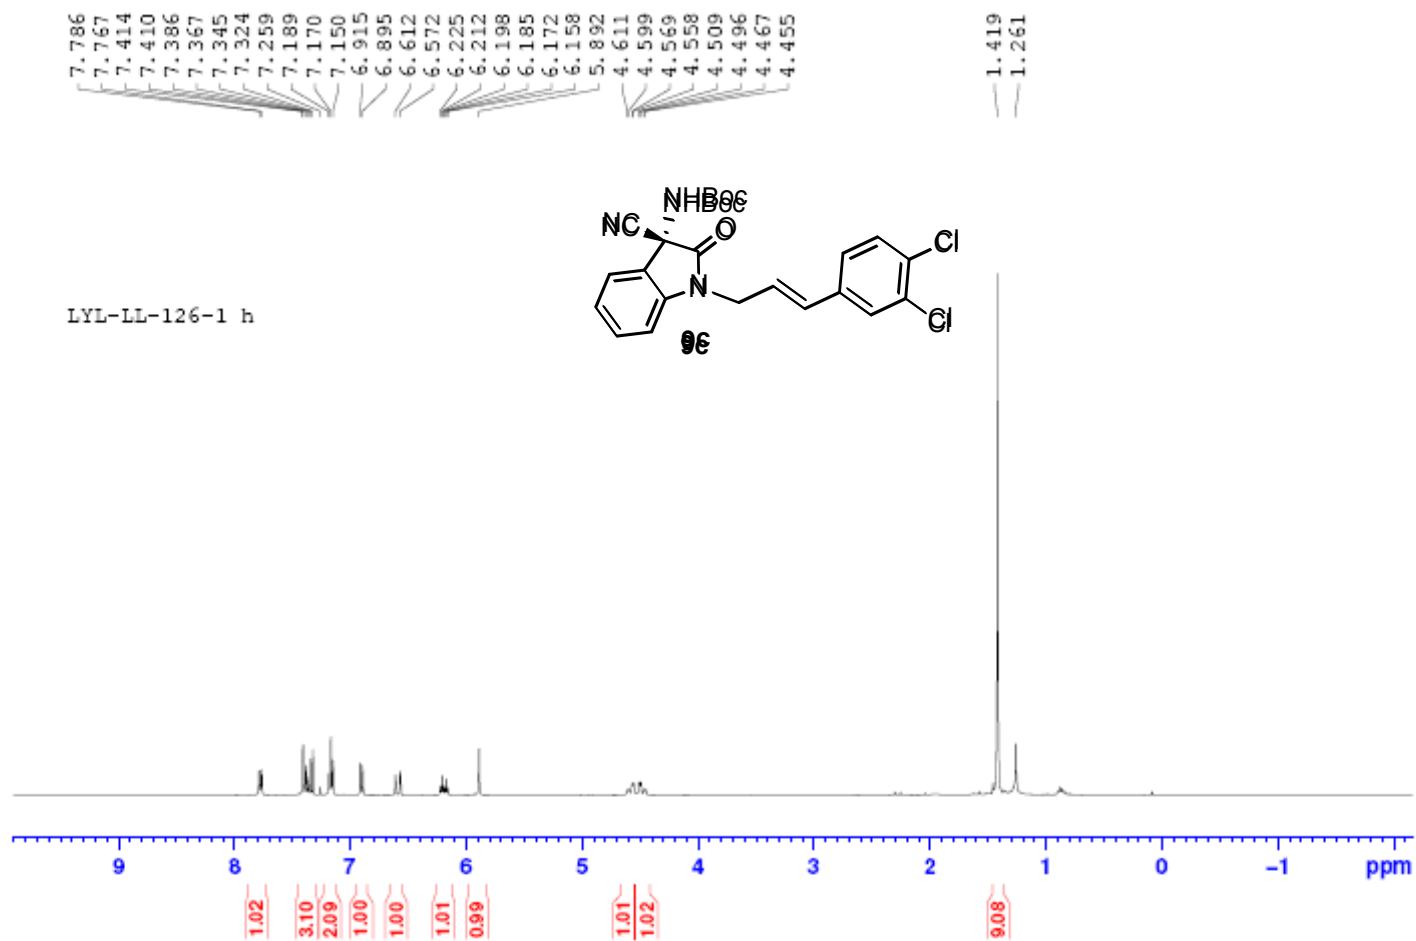

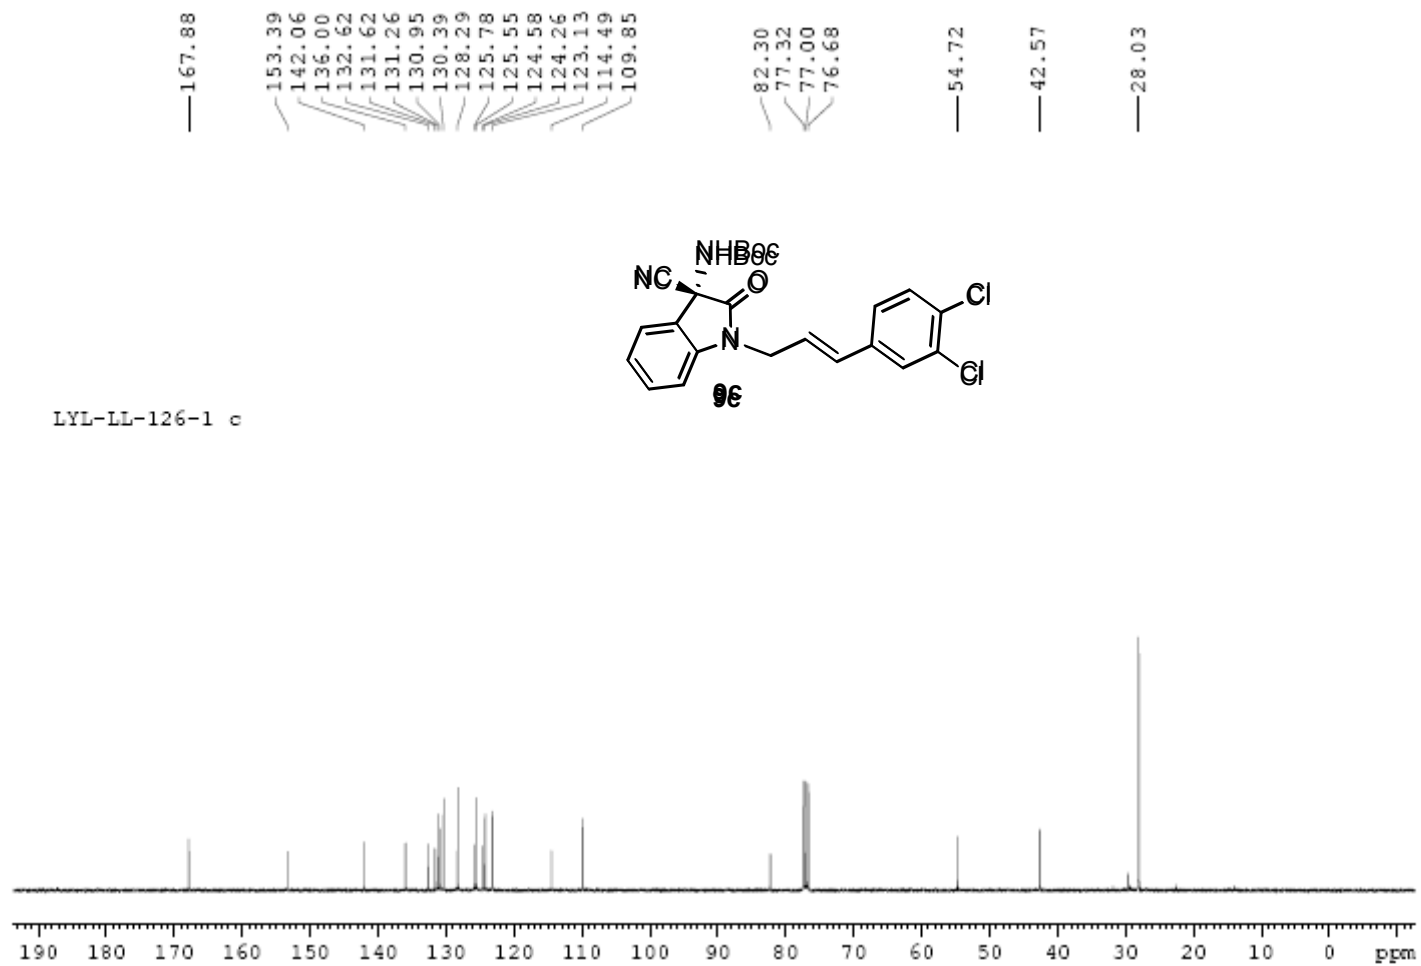

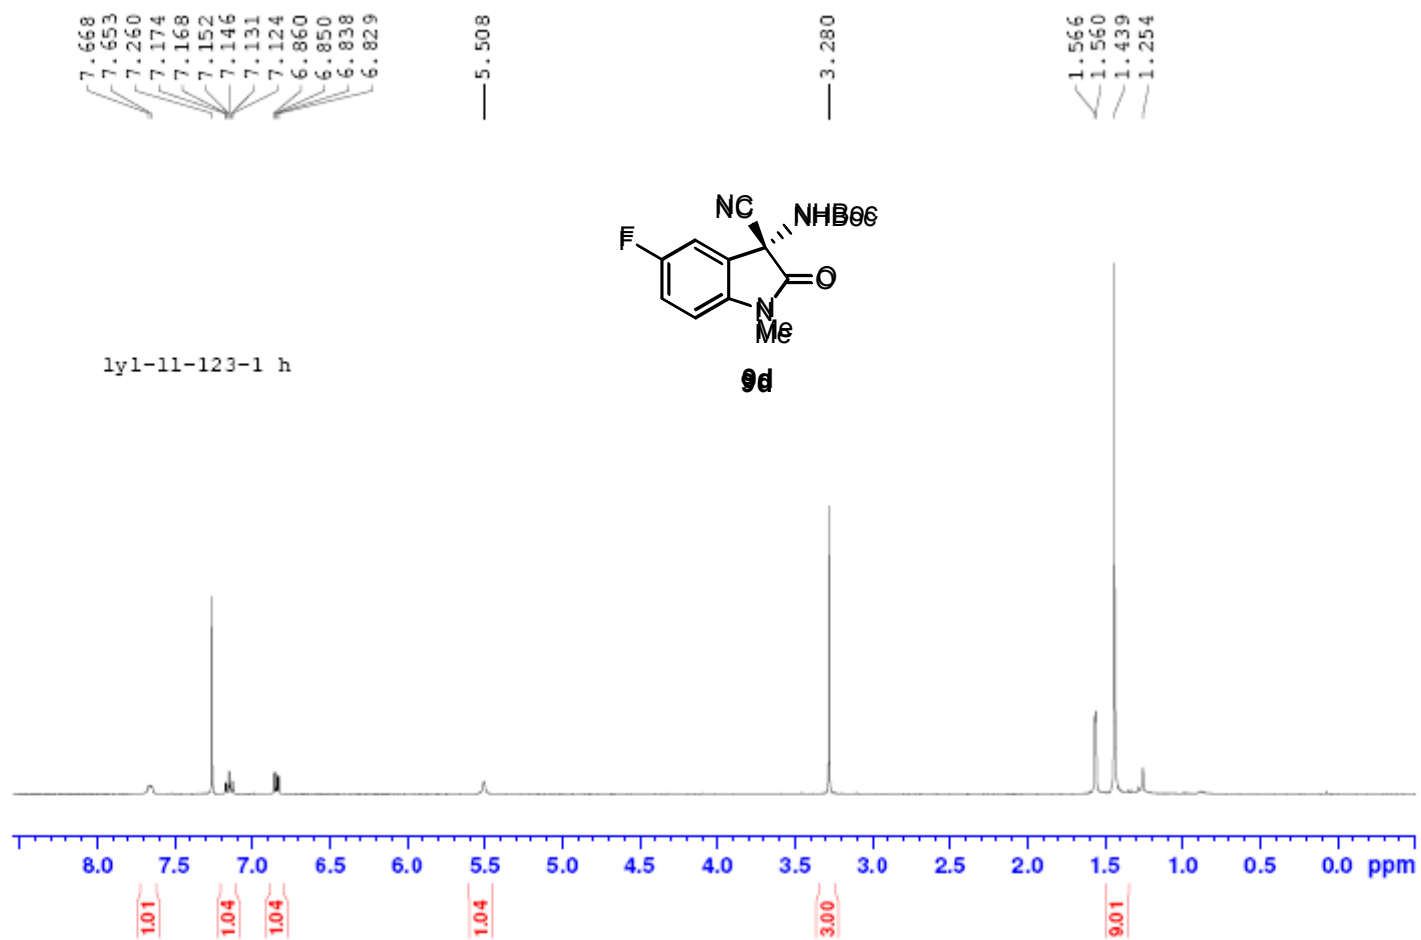



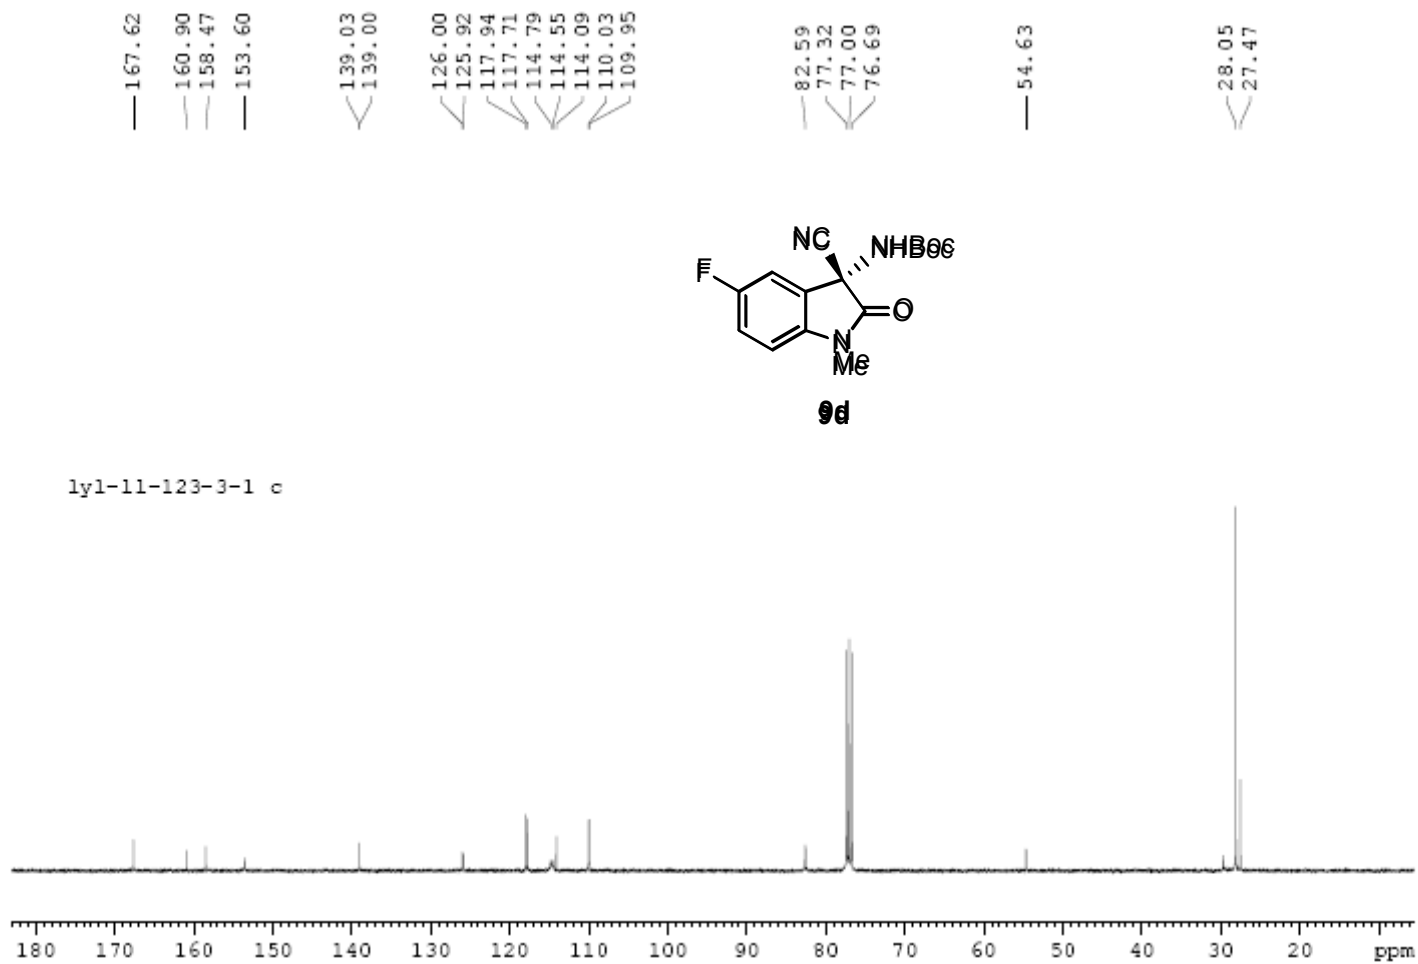

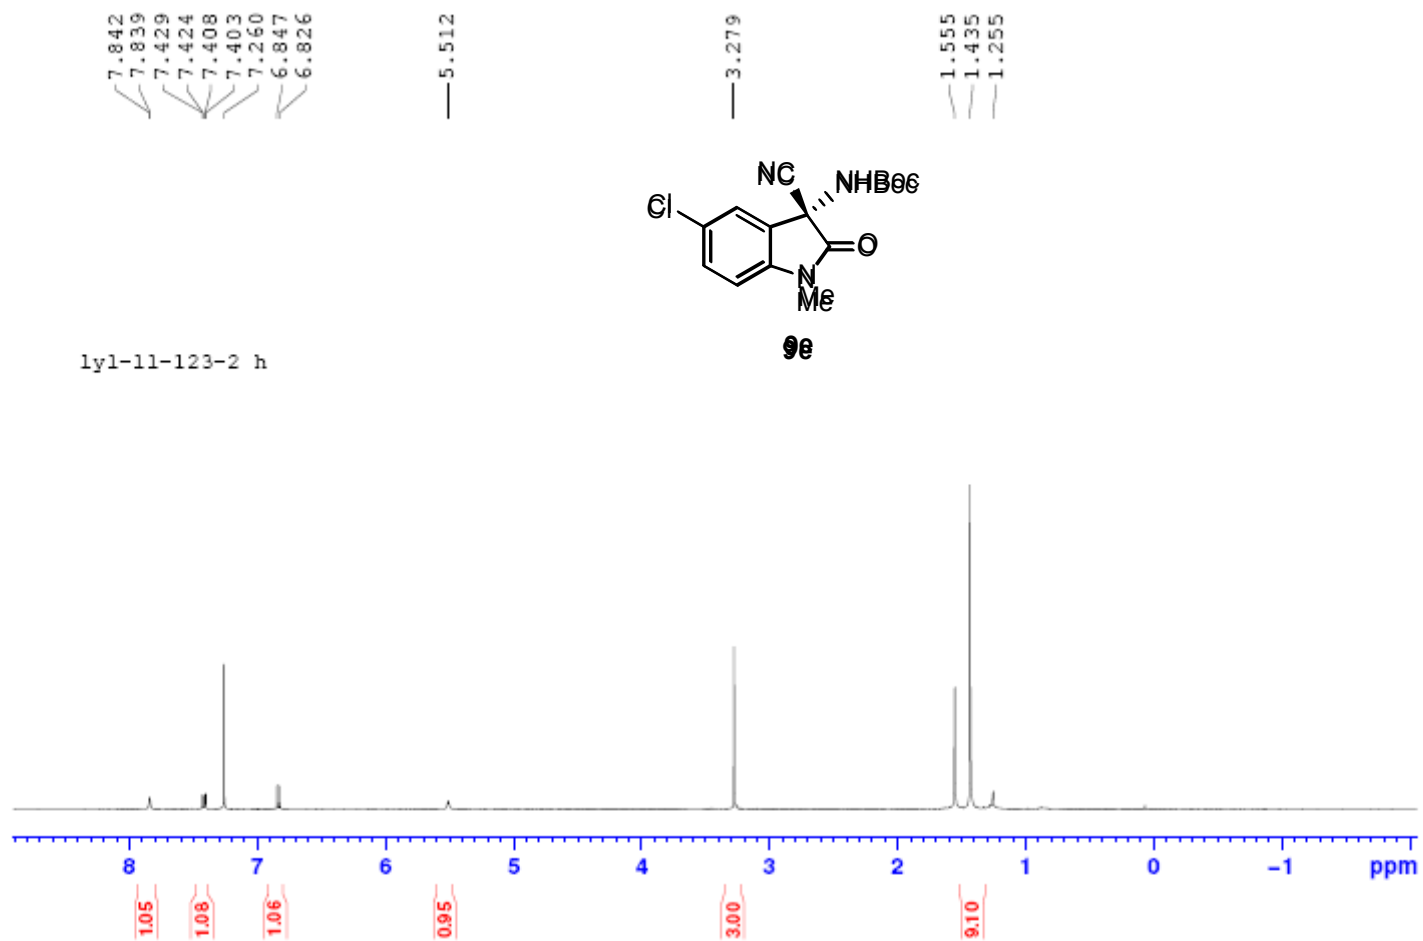

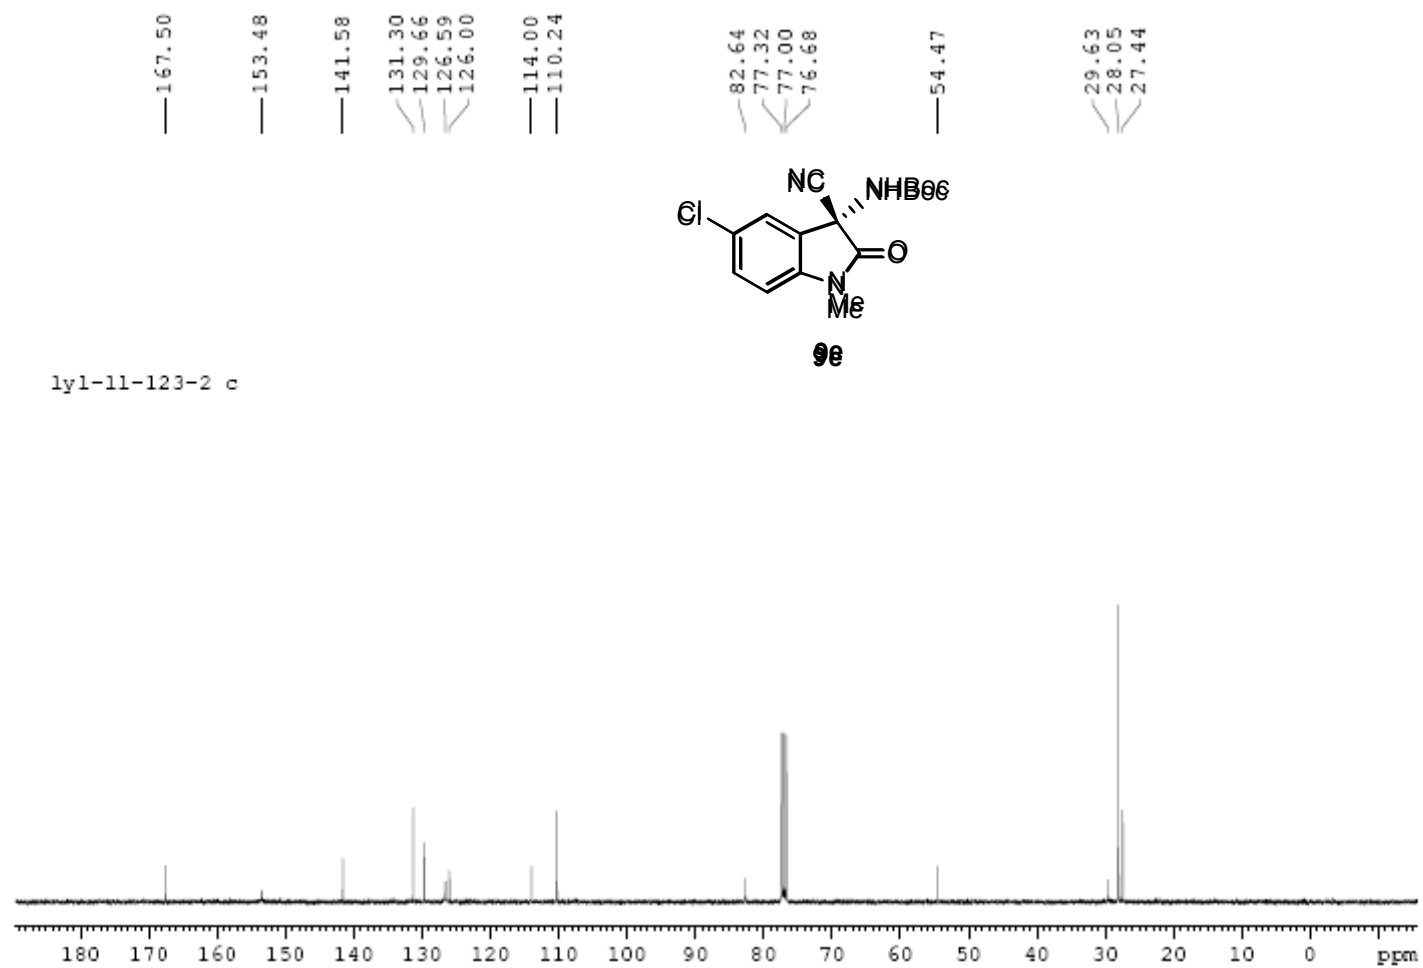

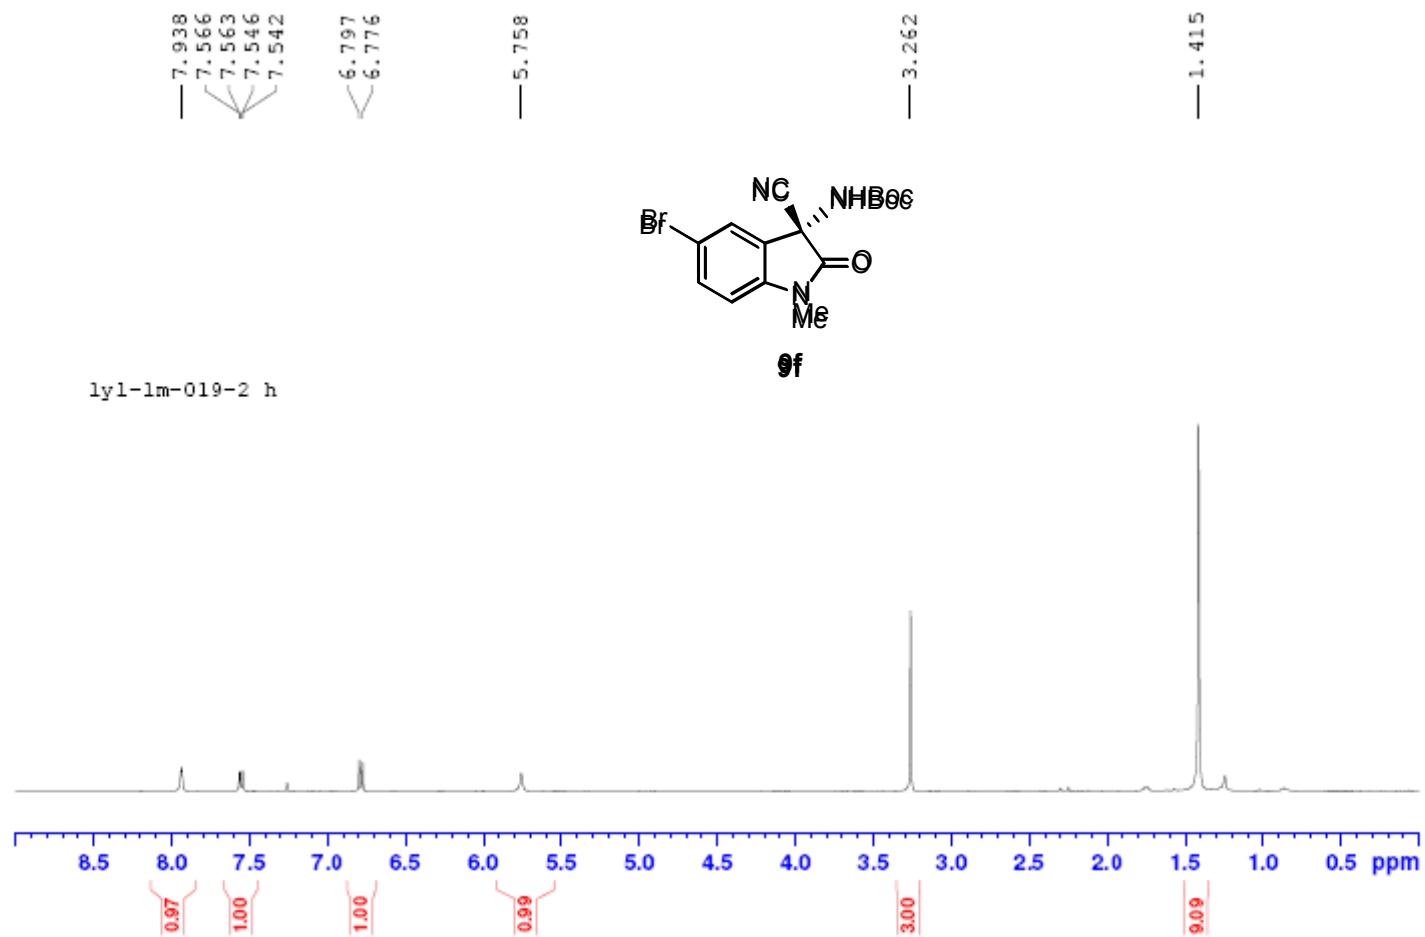

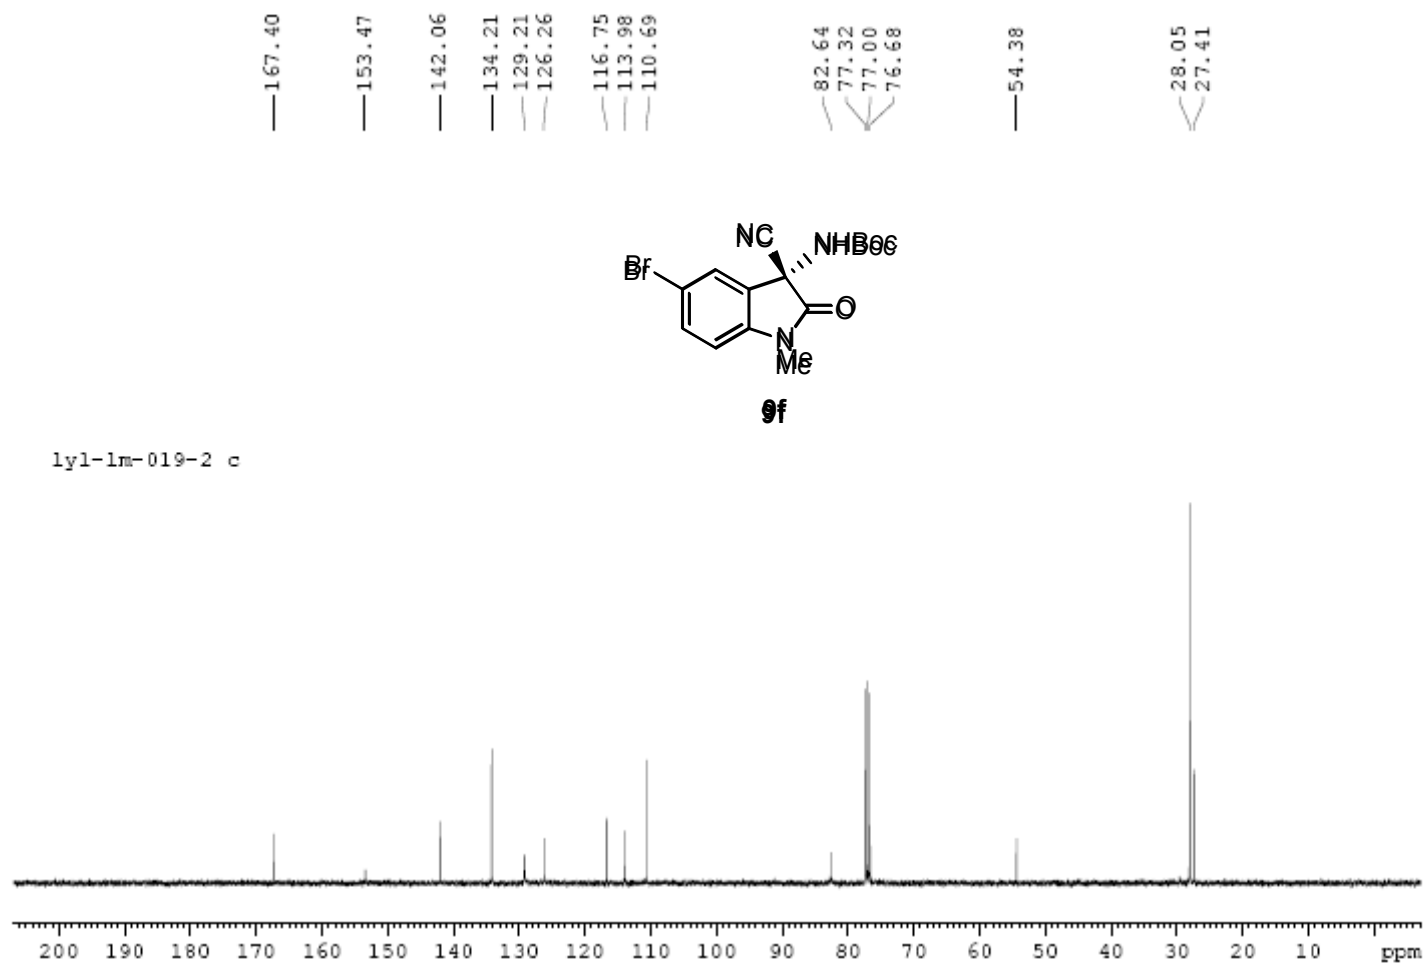

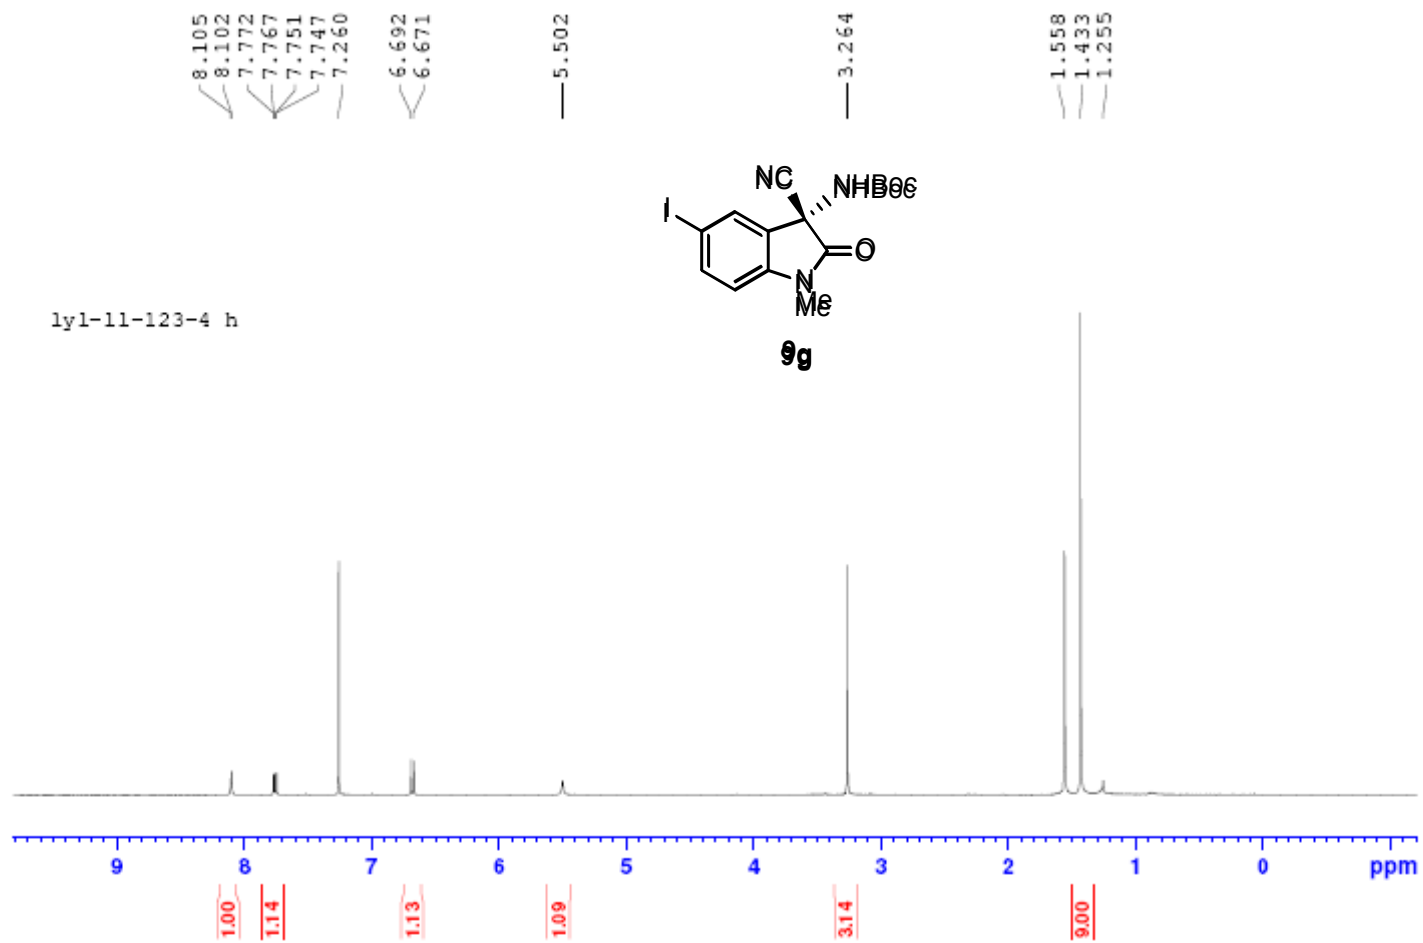

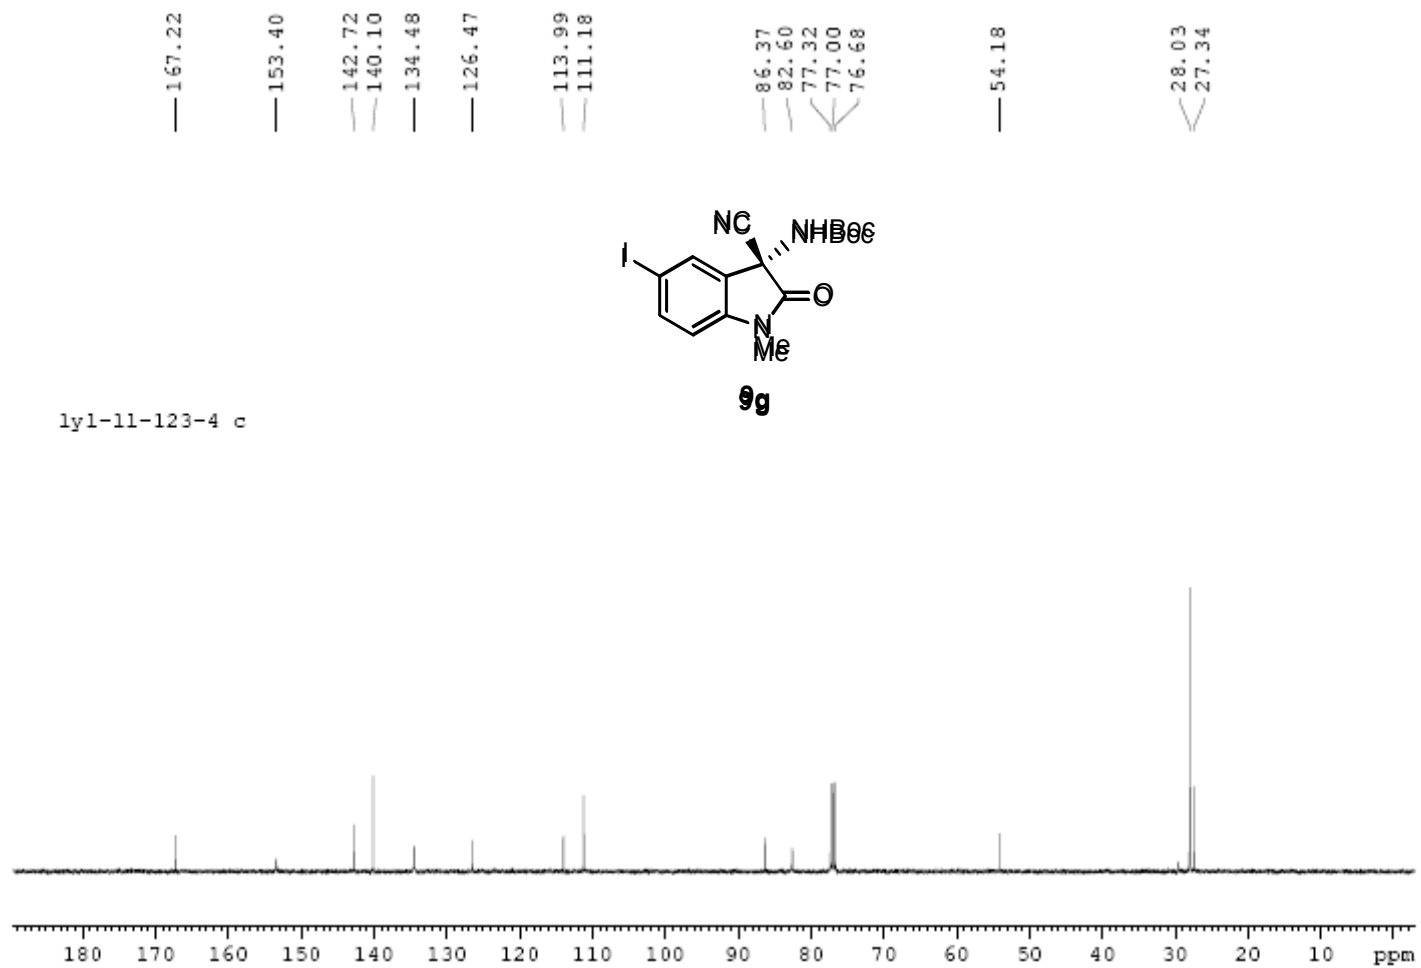

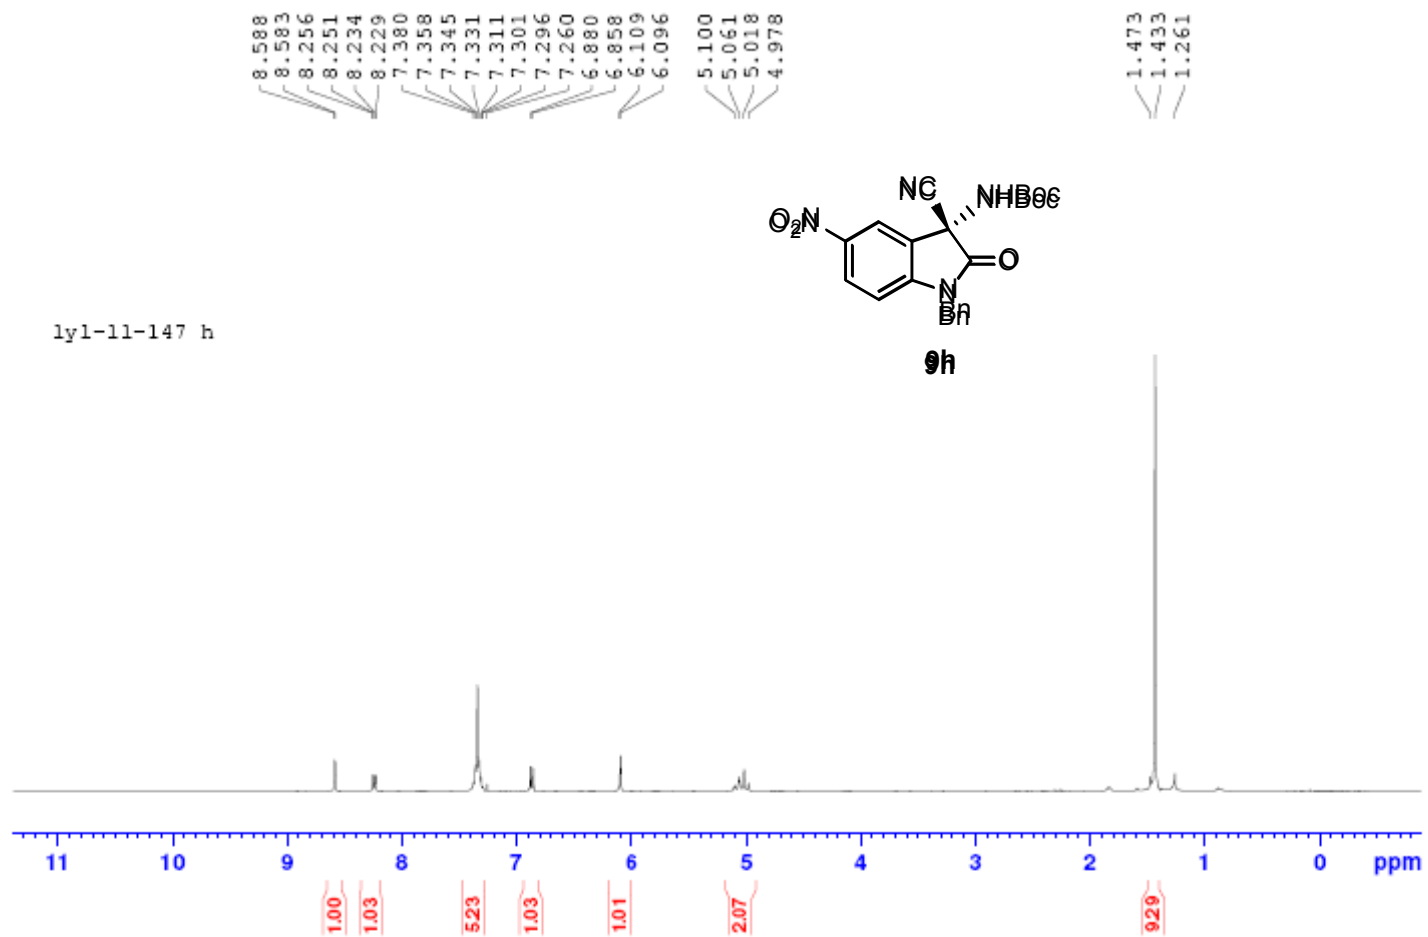



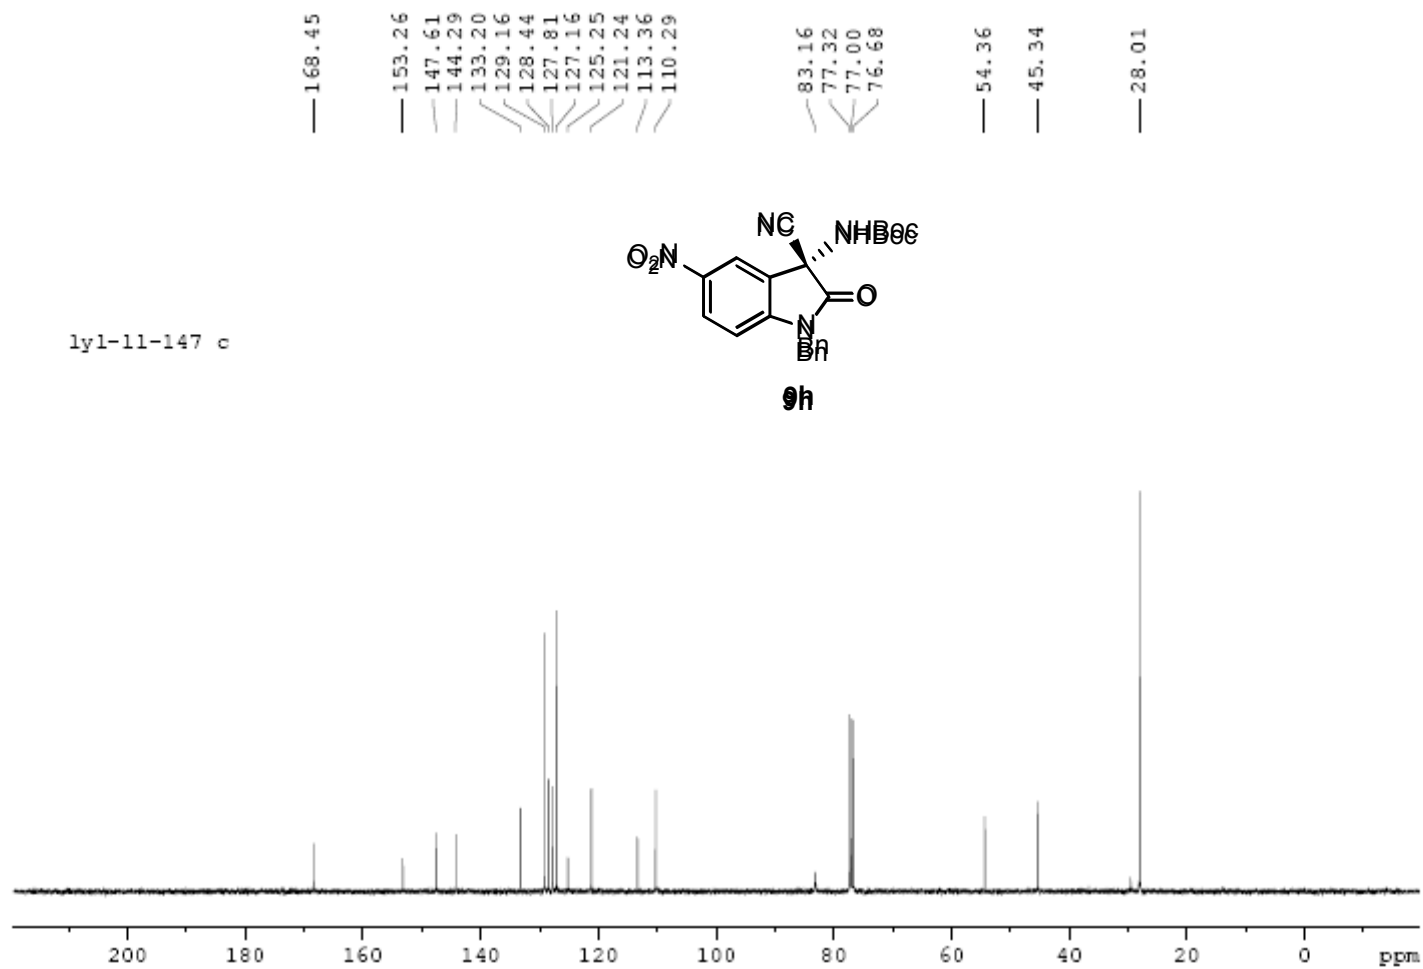

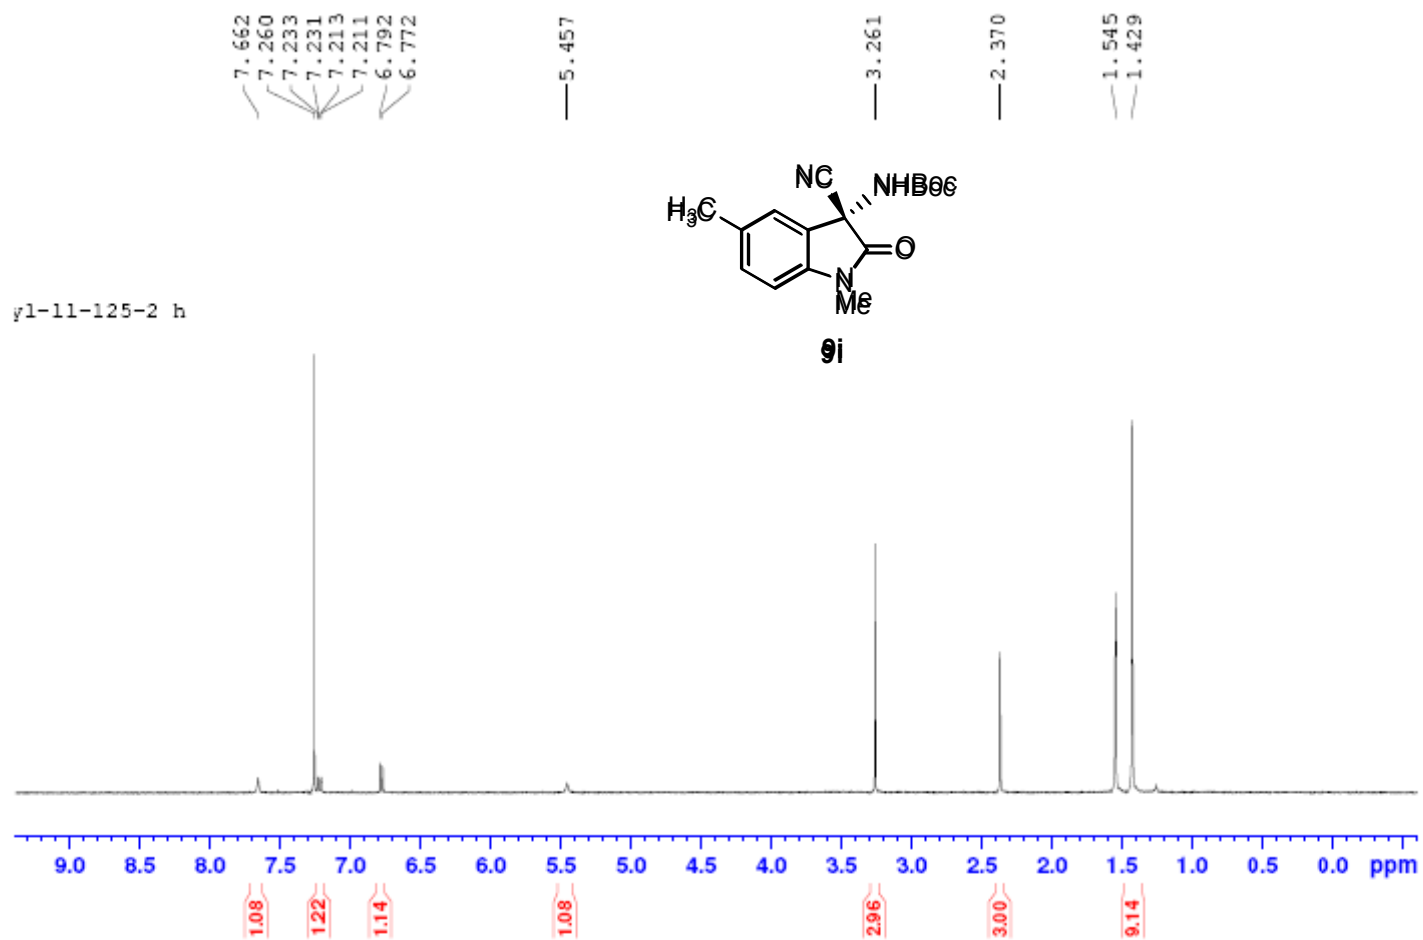

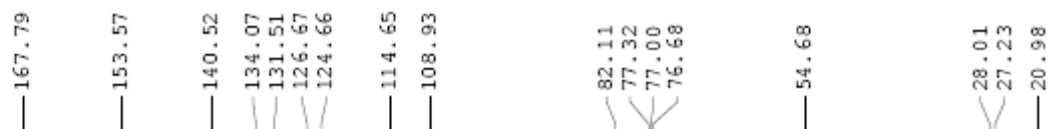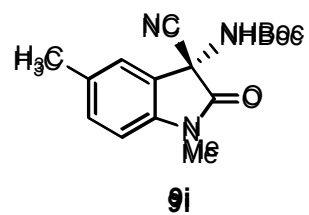

1y1-11-125-2 c

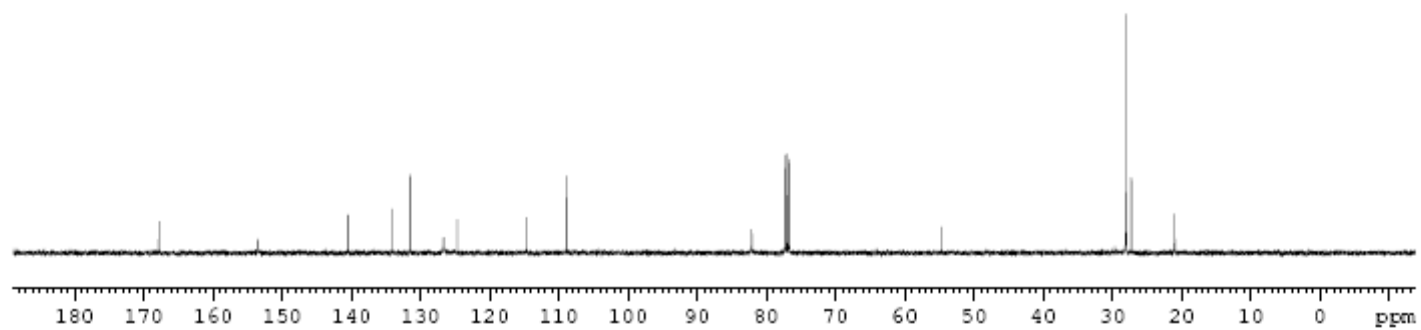

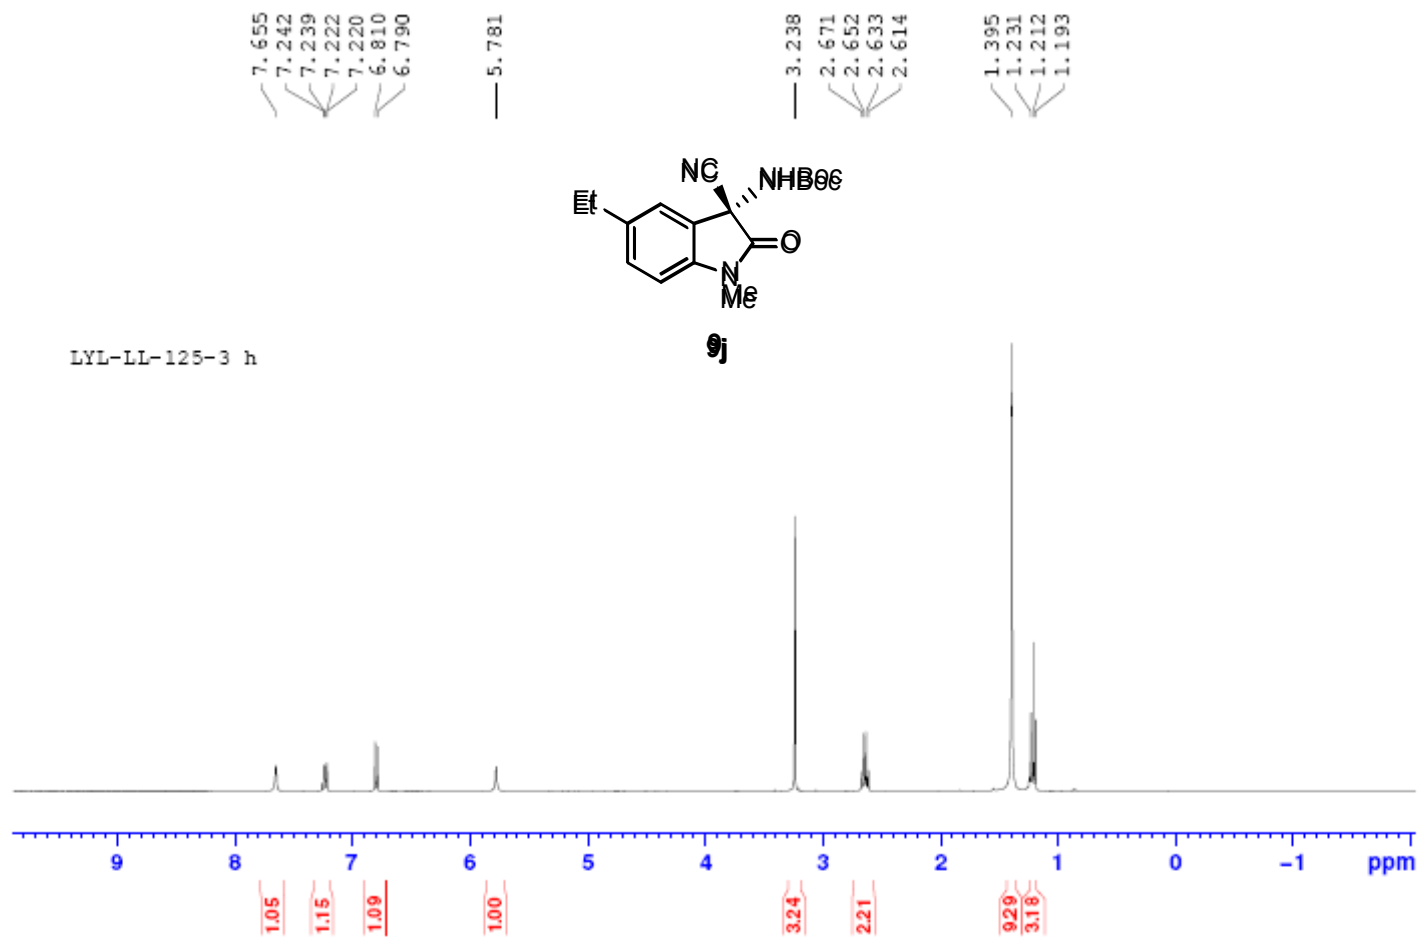

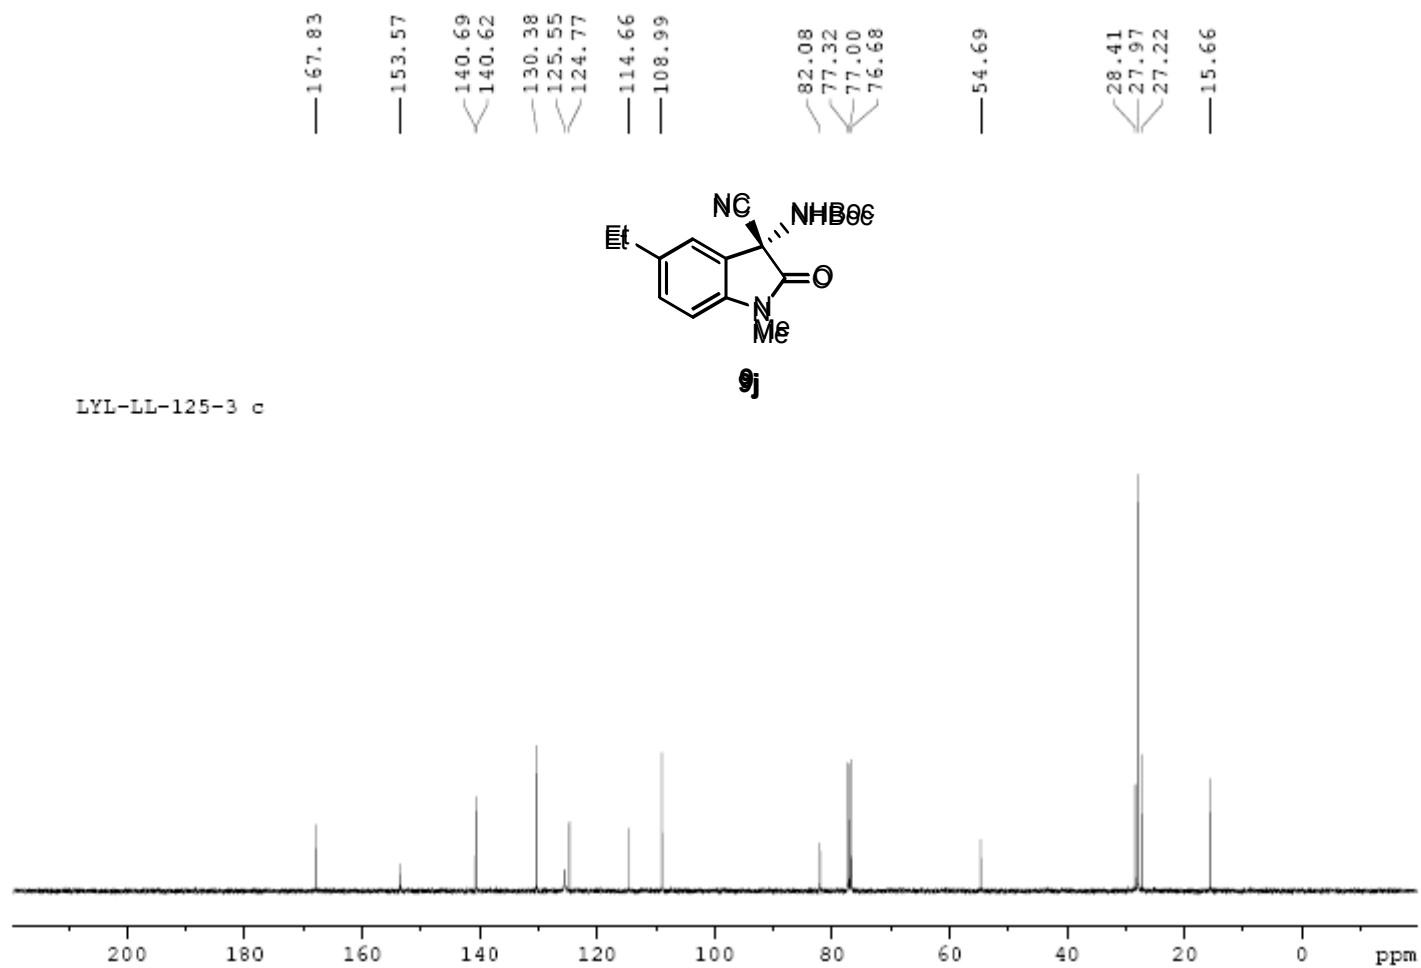

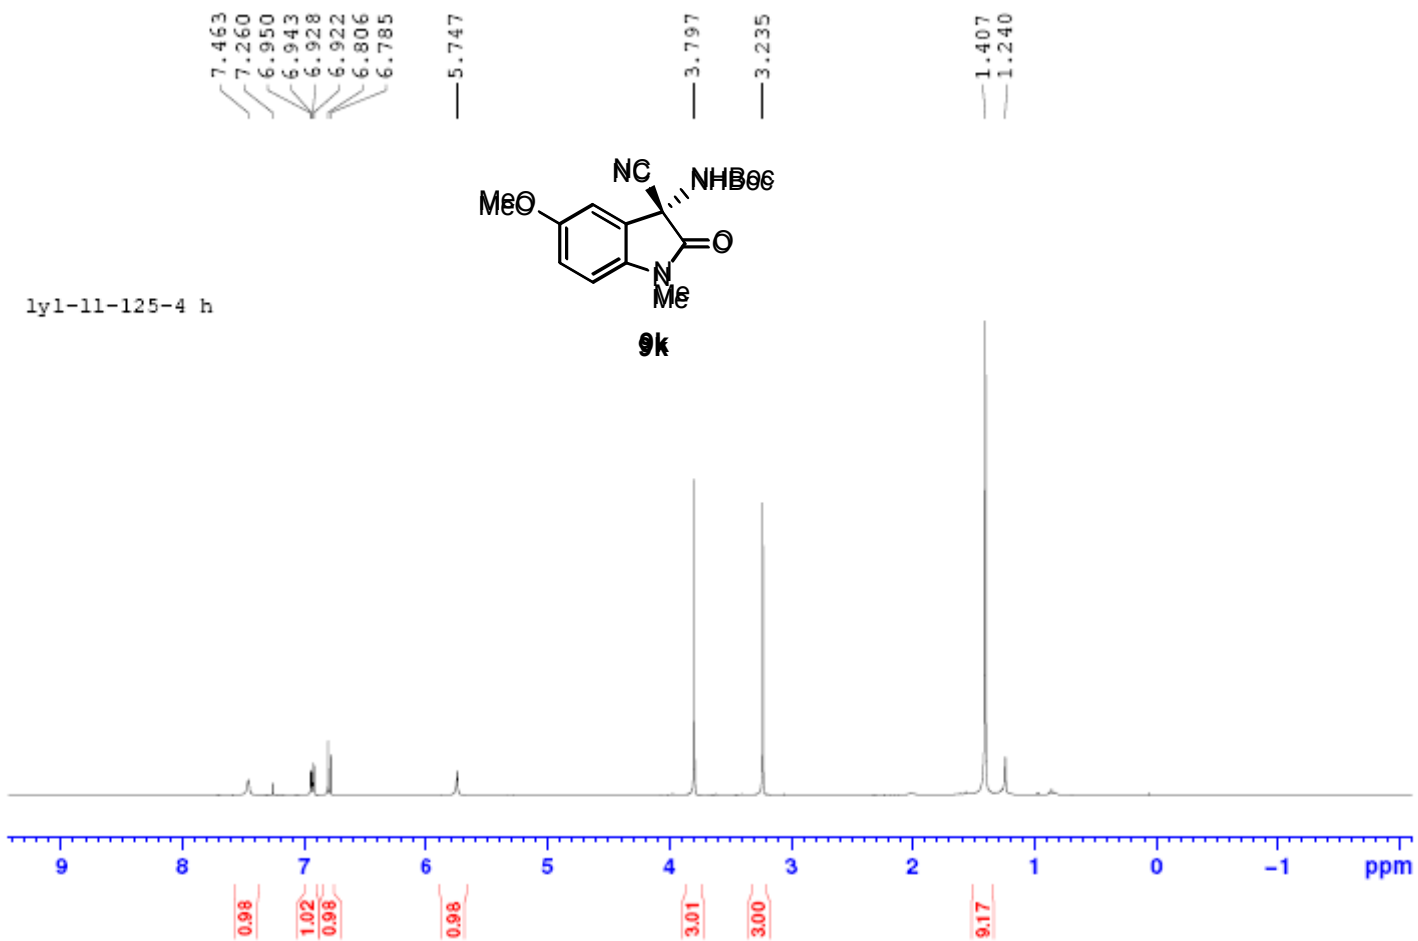

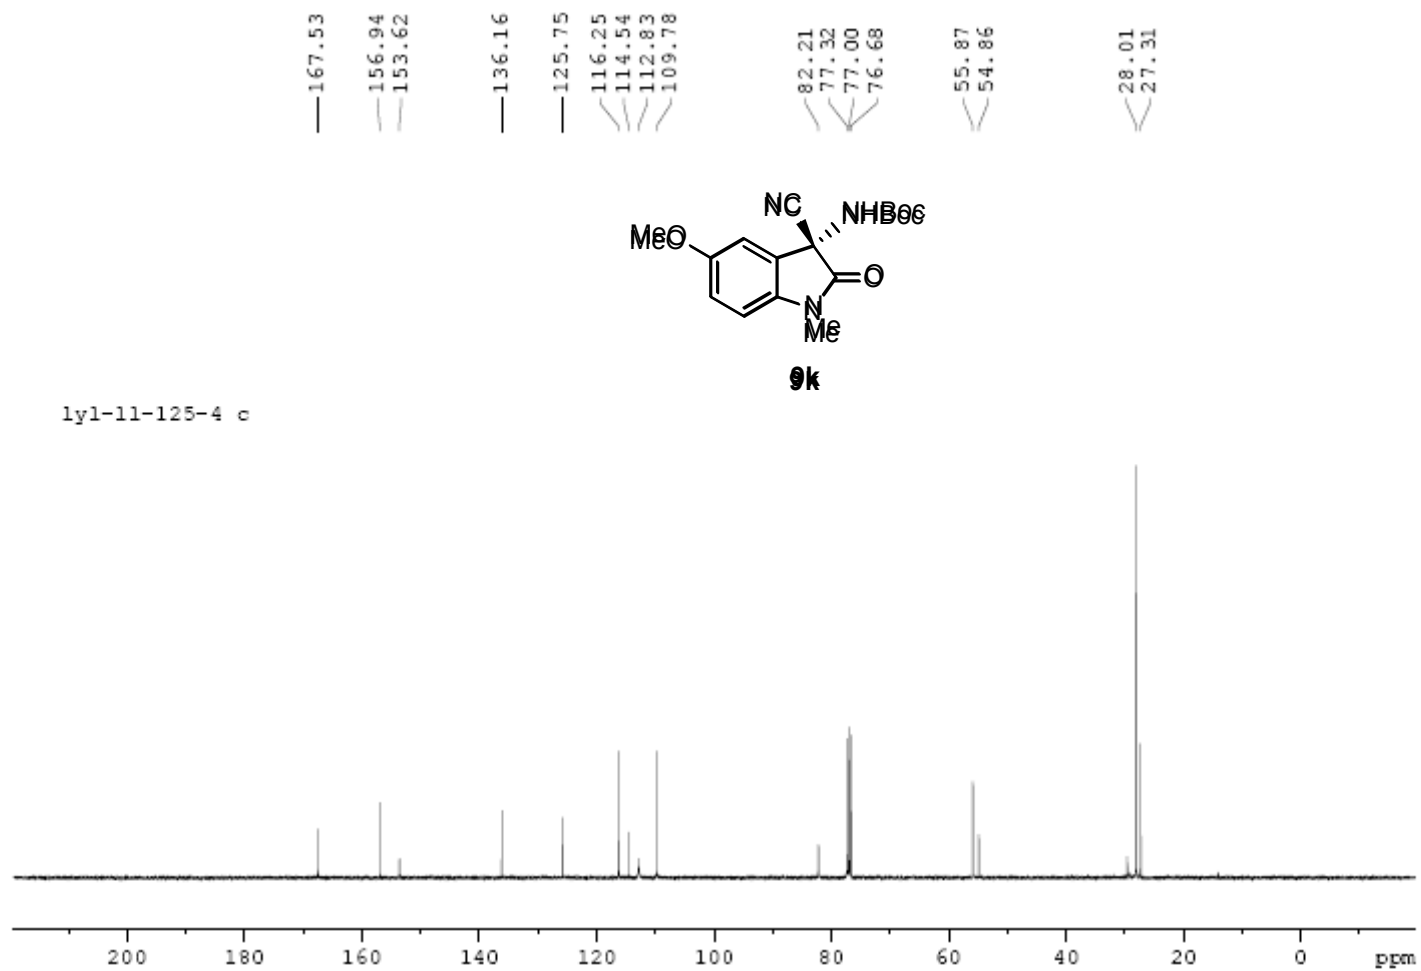

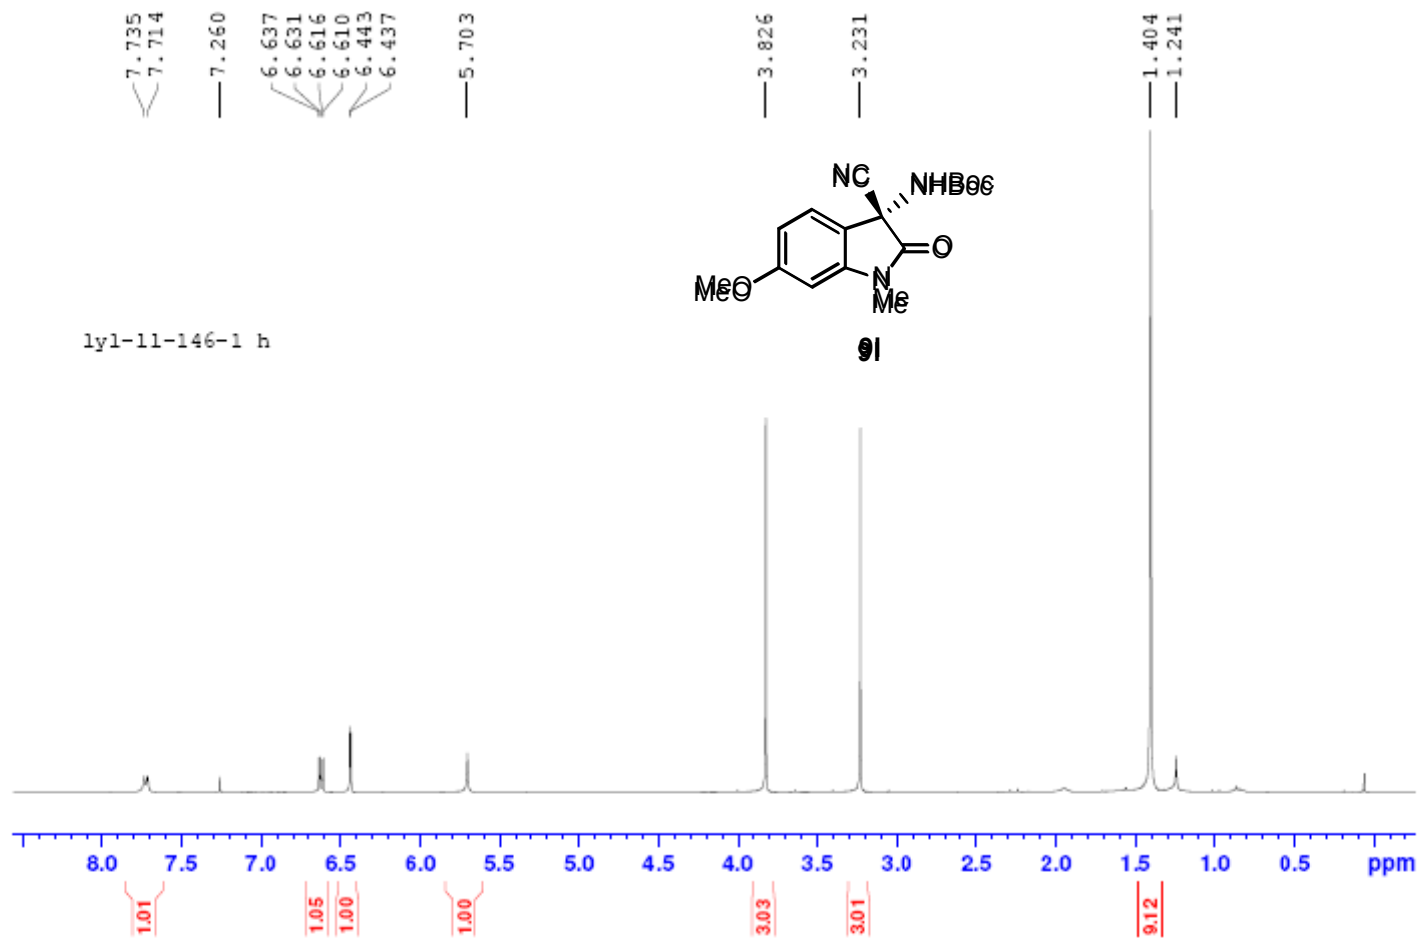



—168.38  
—162.32  
—153.63  
—144.41  
  
—127.32  
116.53  
114.79  
—107.80  
  
—97.12  
  
82.04  
77.32  
77.00  
76.68  
  
55.62  
54.26  
  
28.02  
27.22

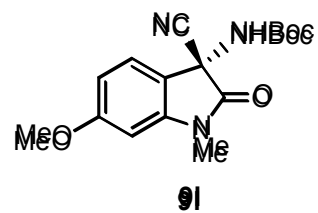

1y1-11-146-1 c

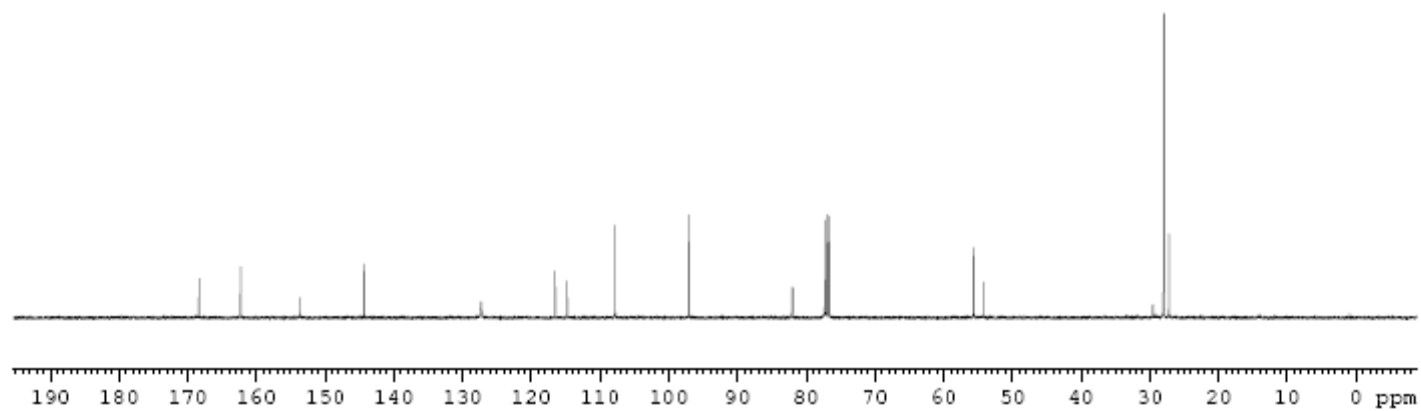

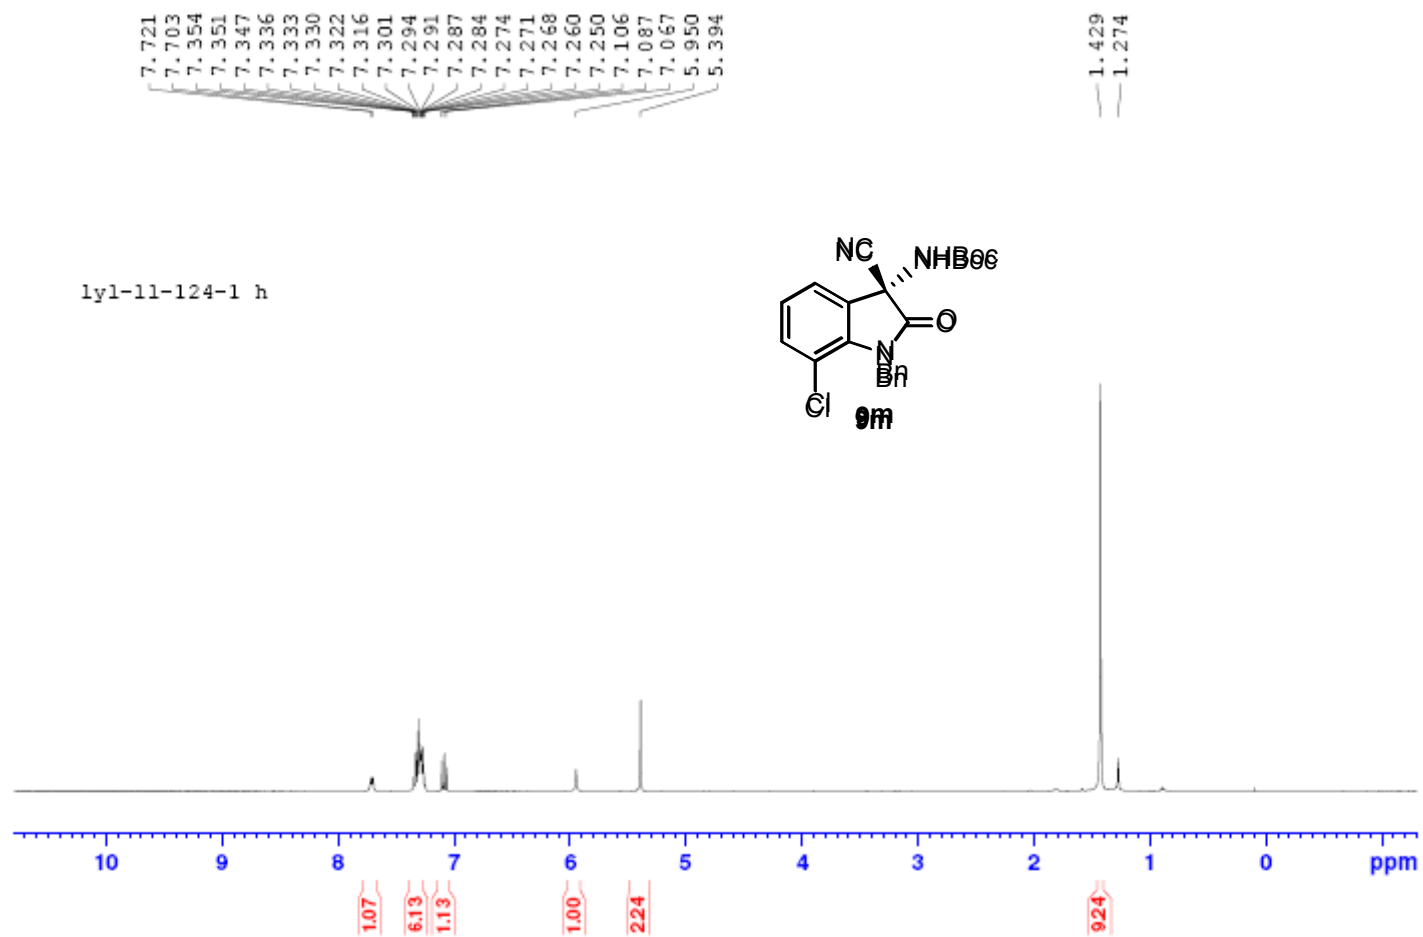

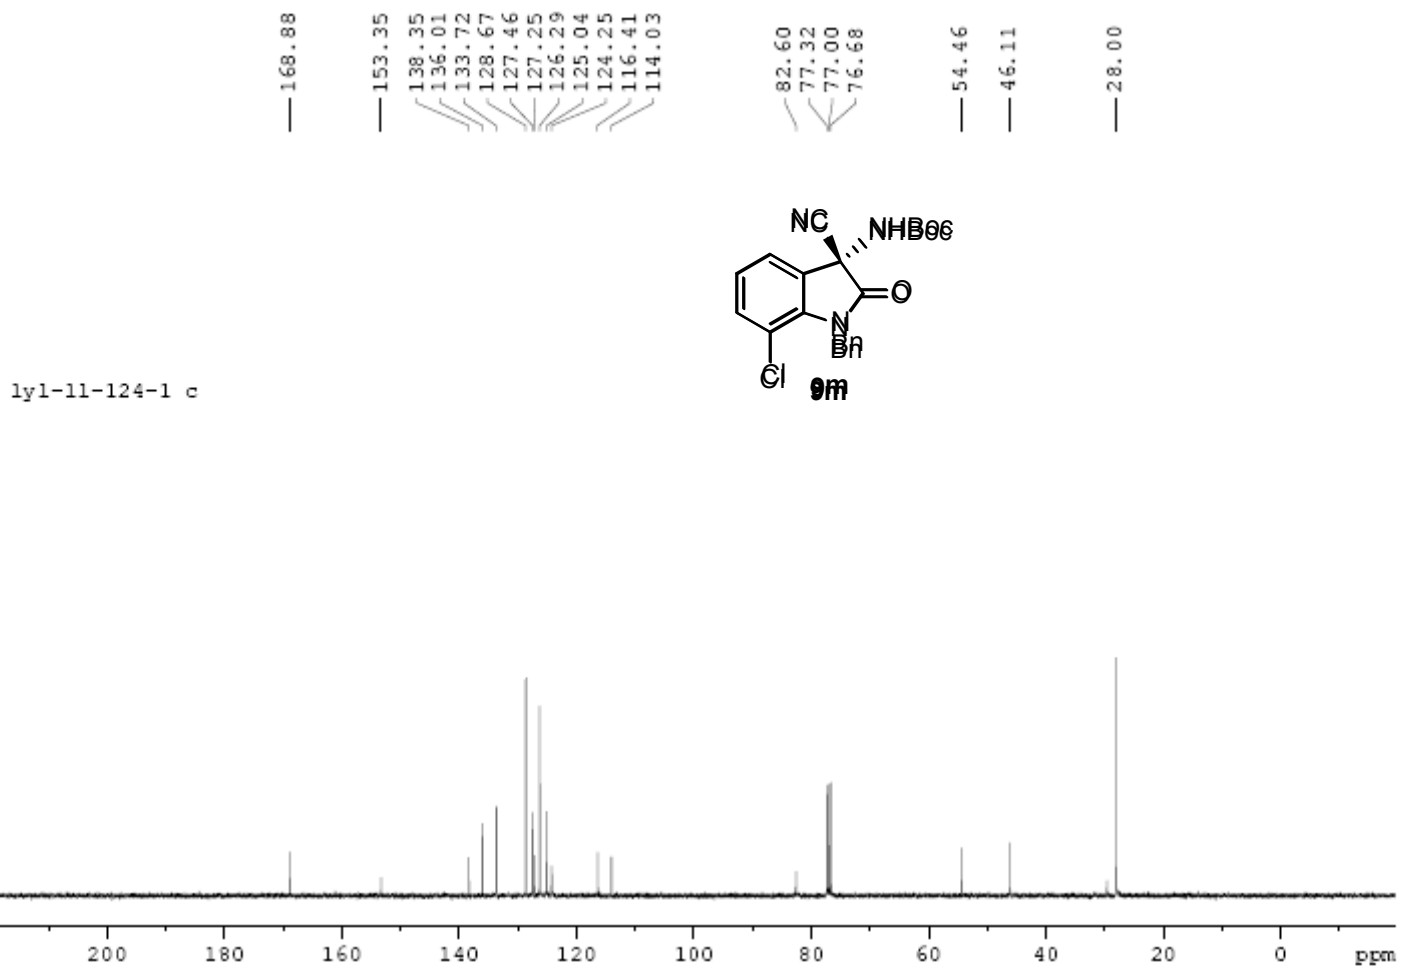

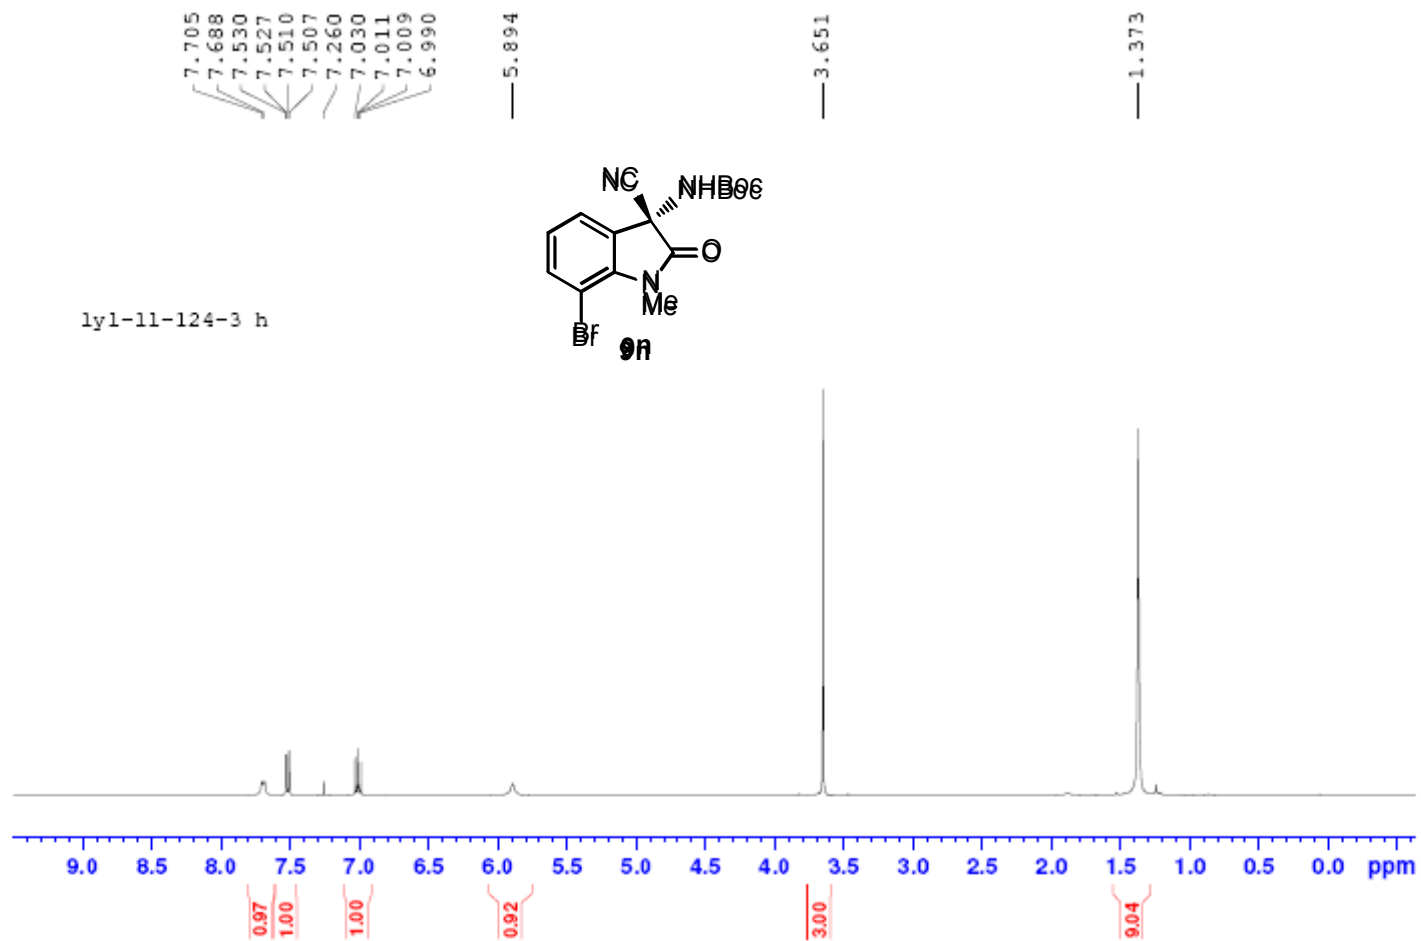

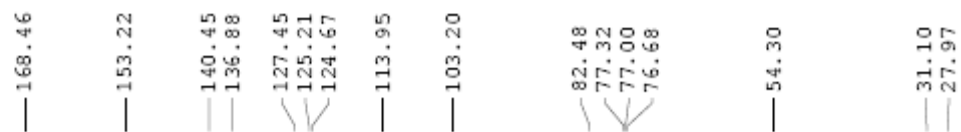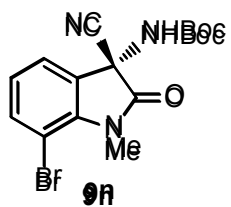

1y1-11-124-3 c

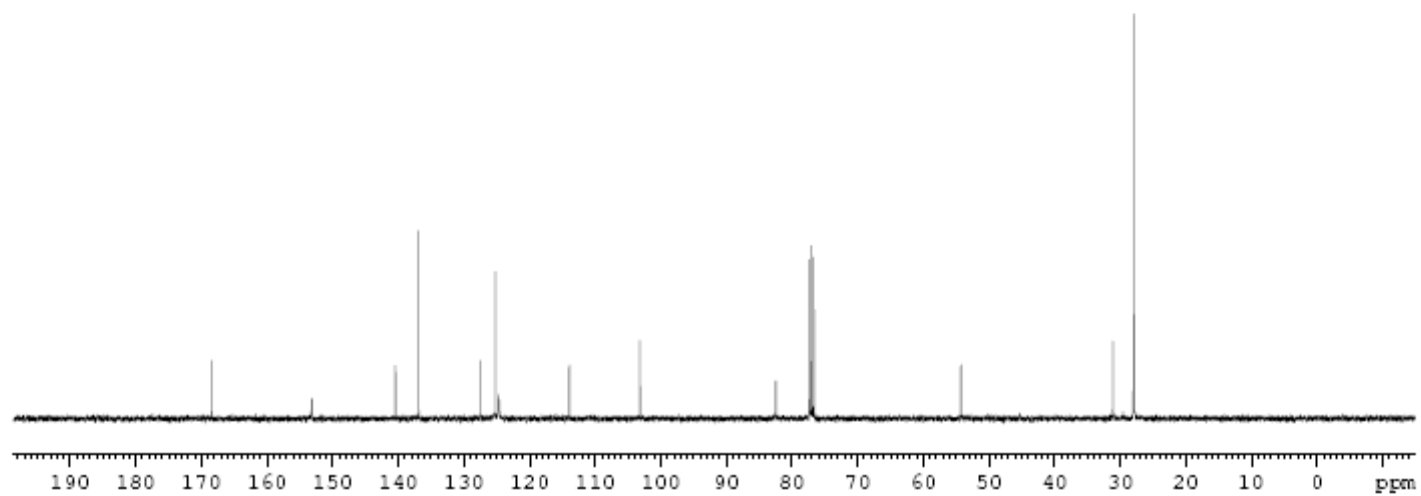

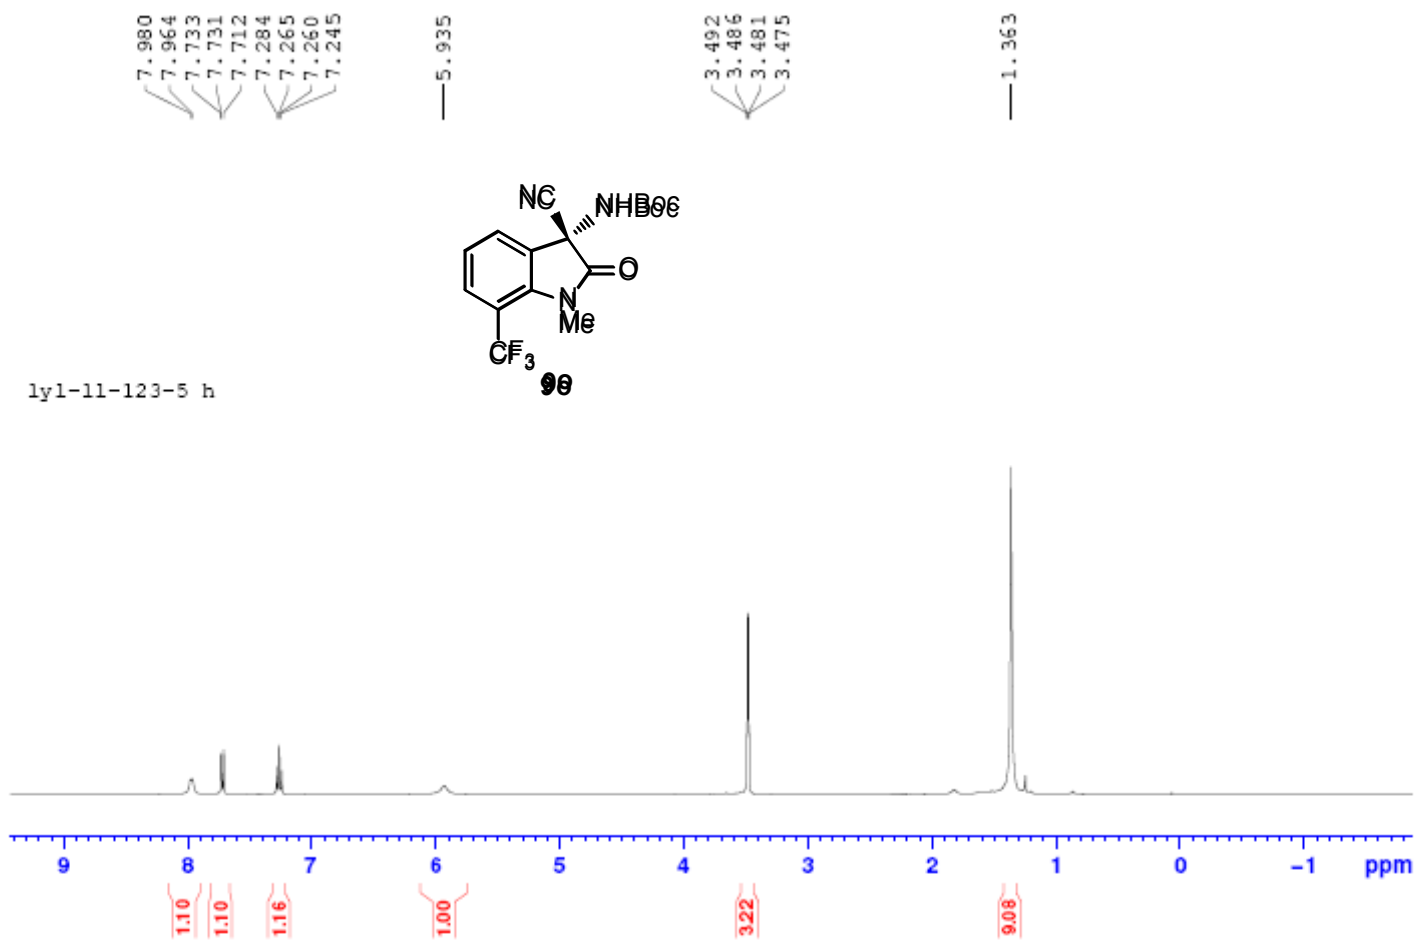

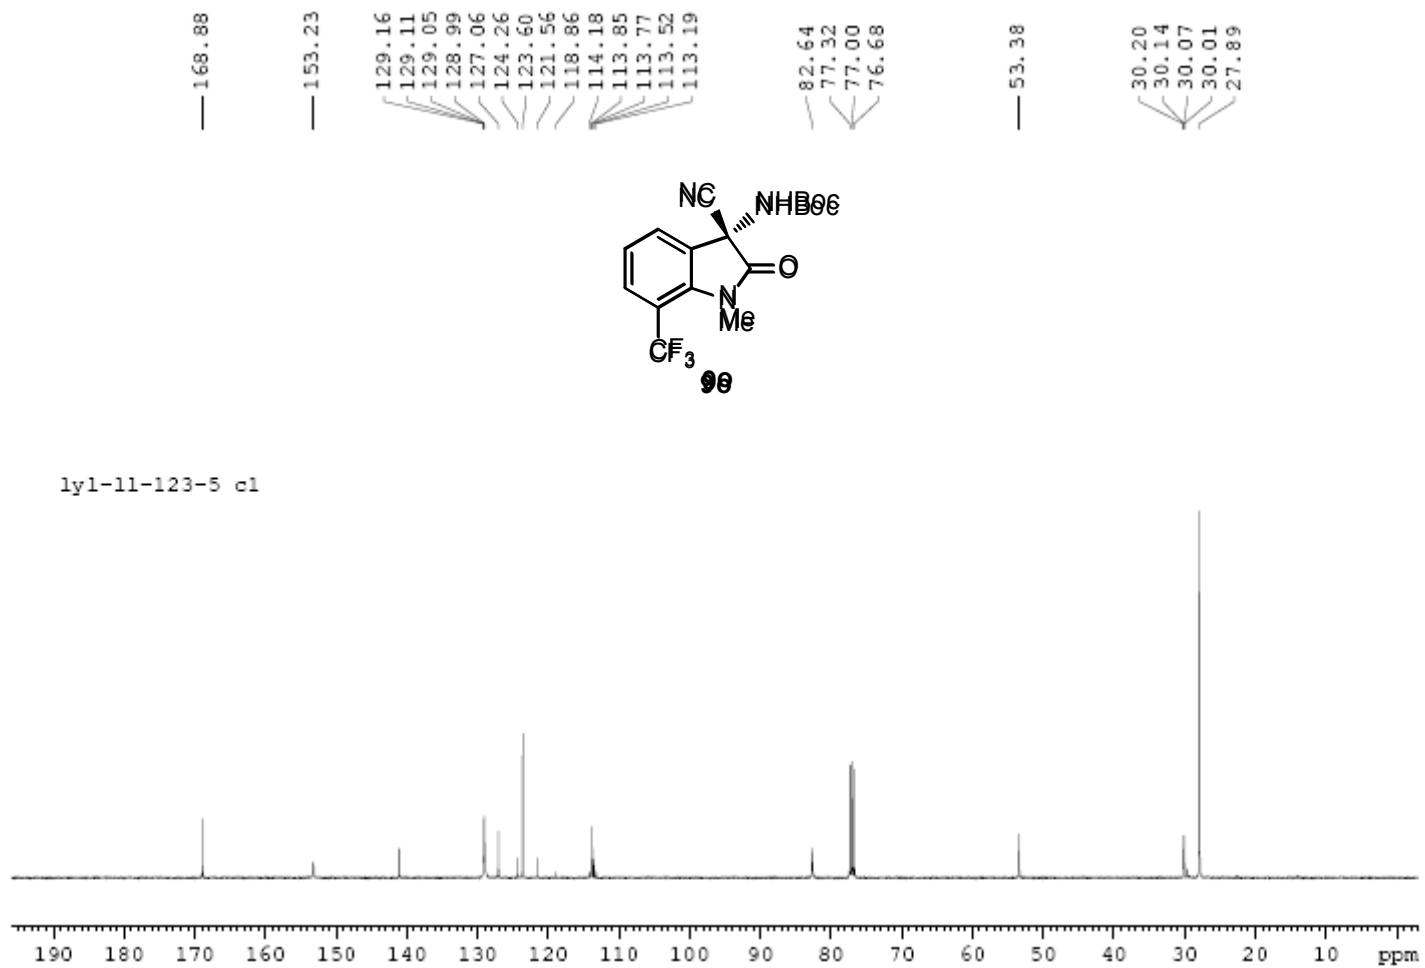

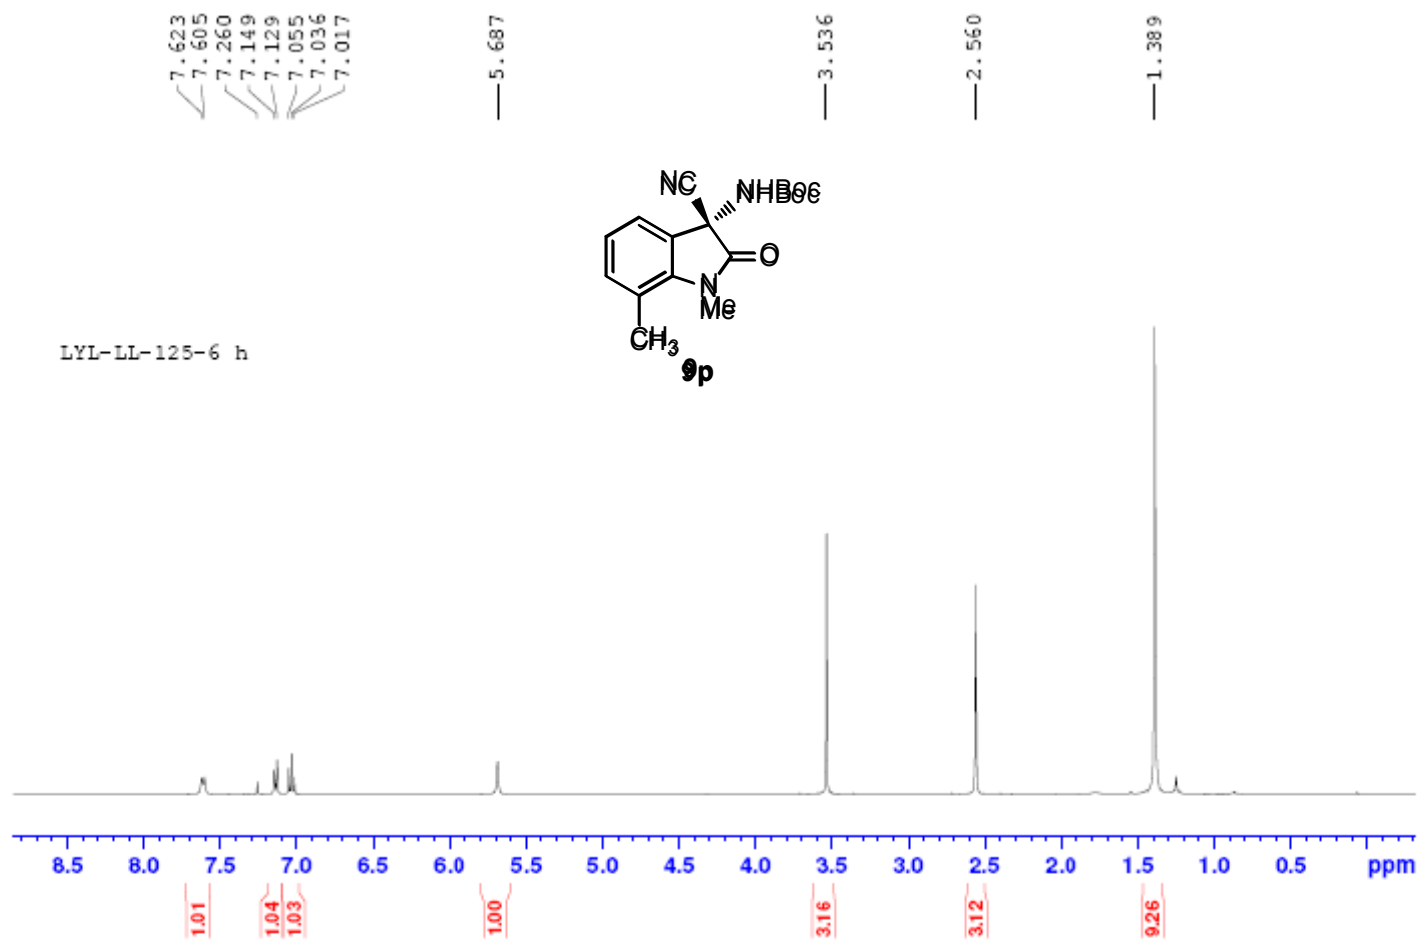



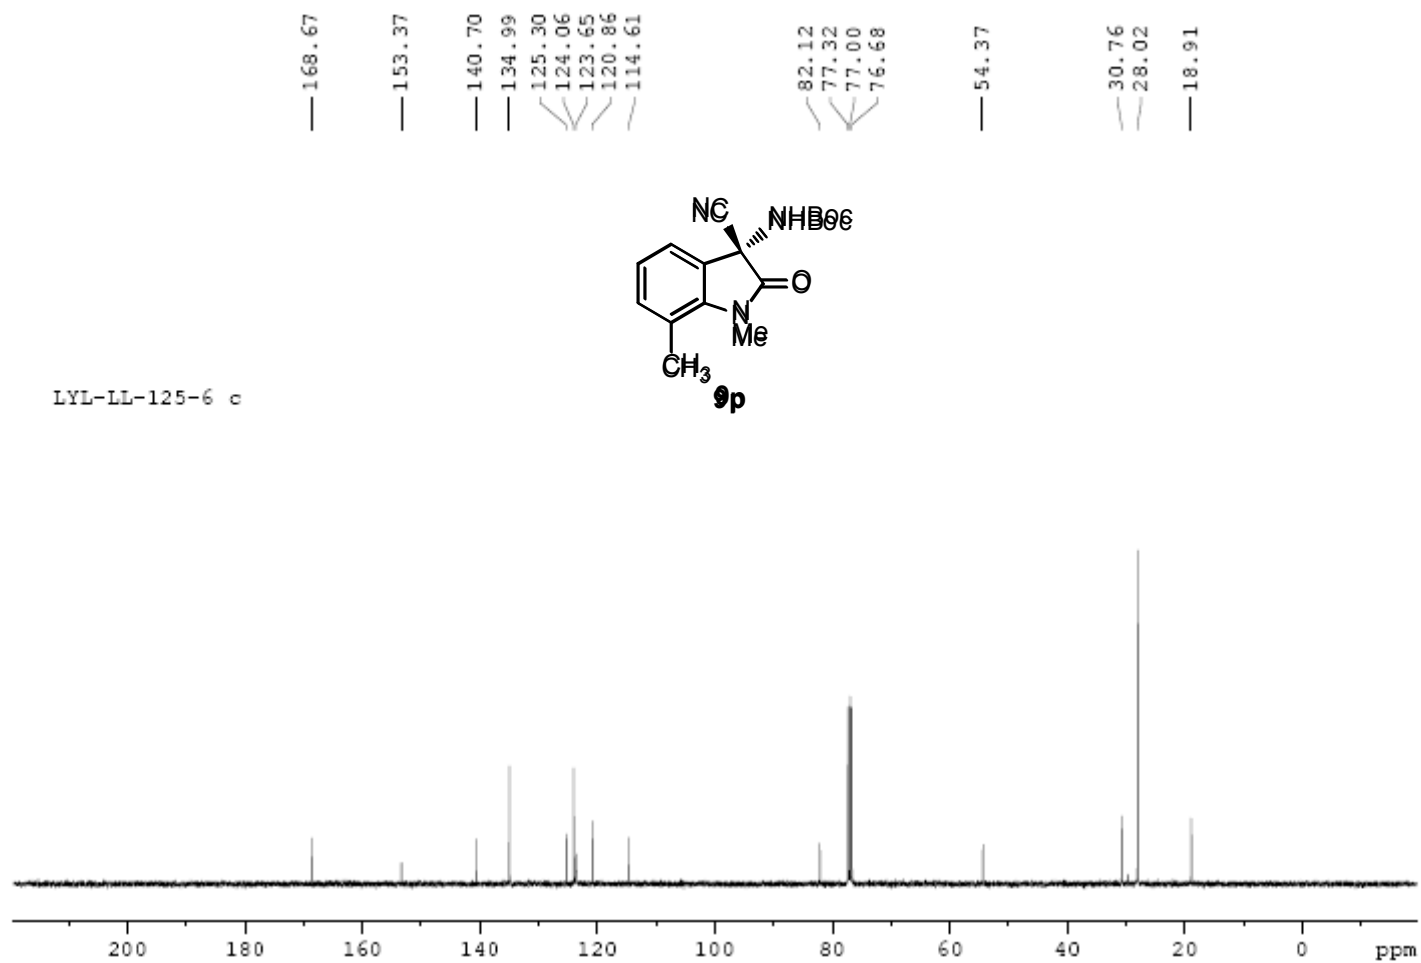

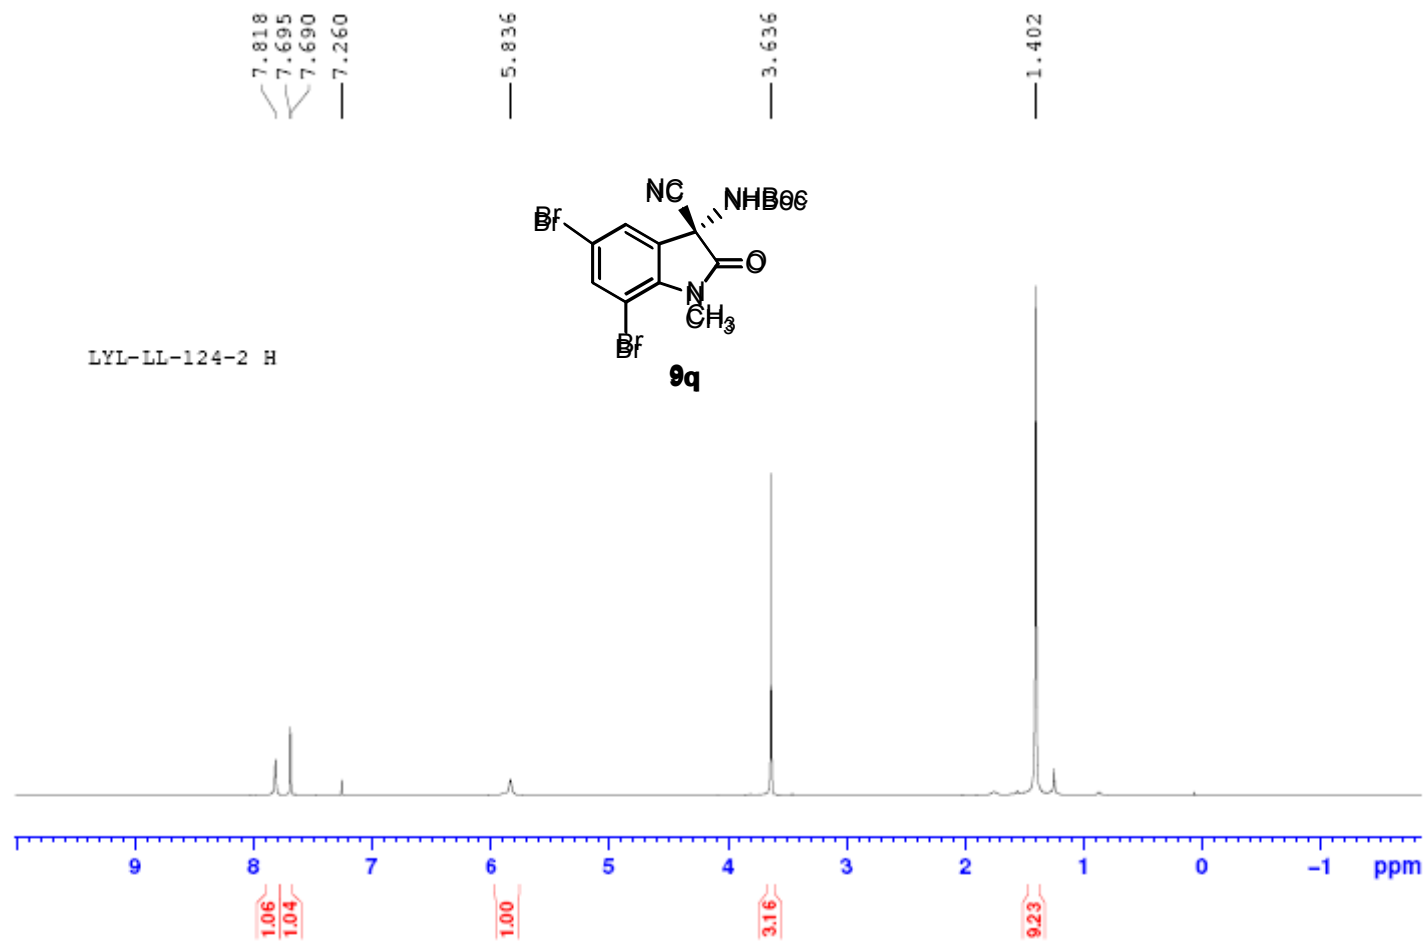

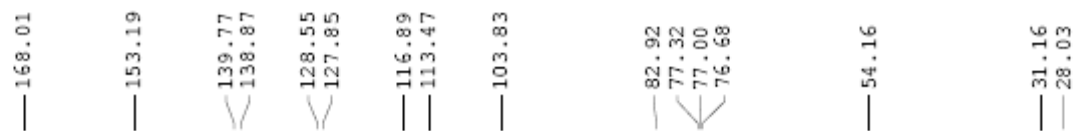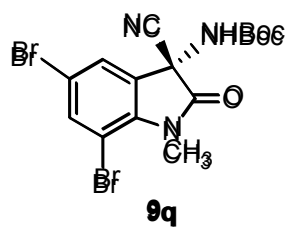

1y1-11-124-2 c

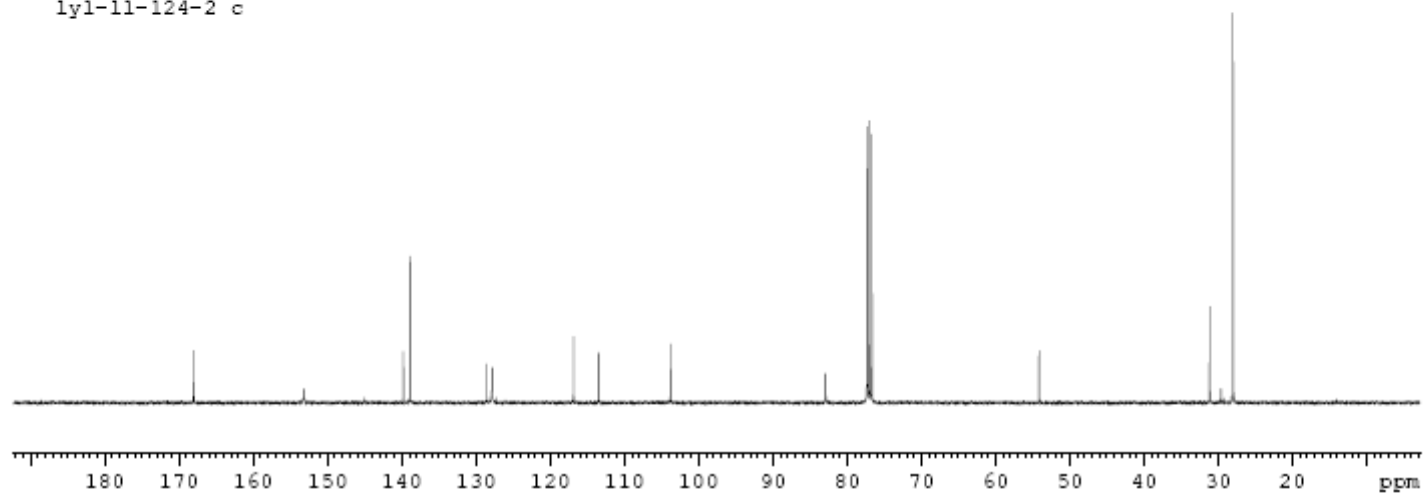

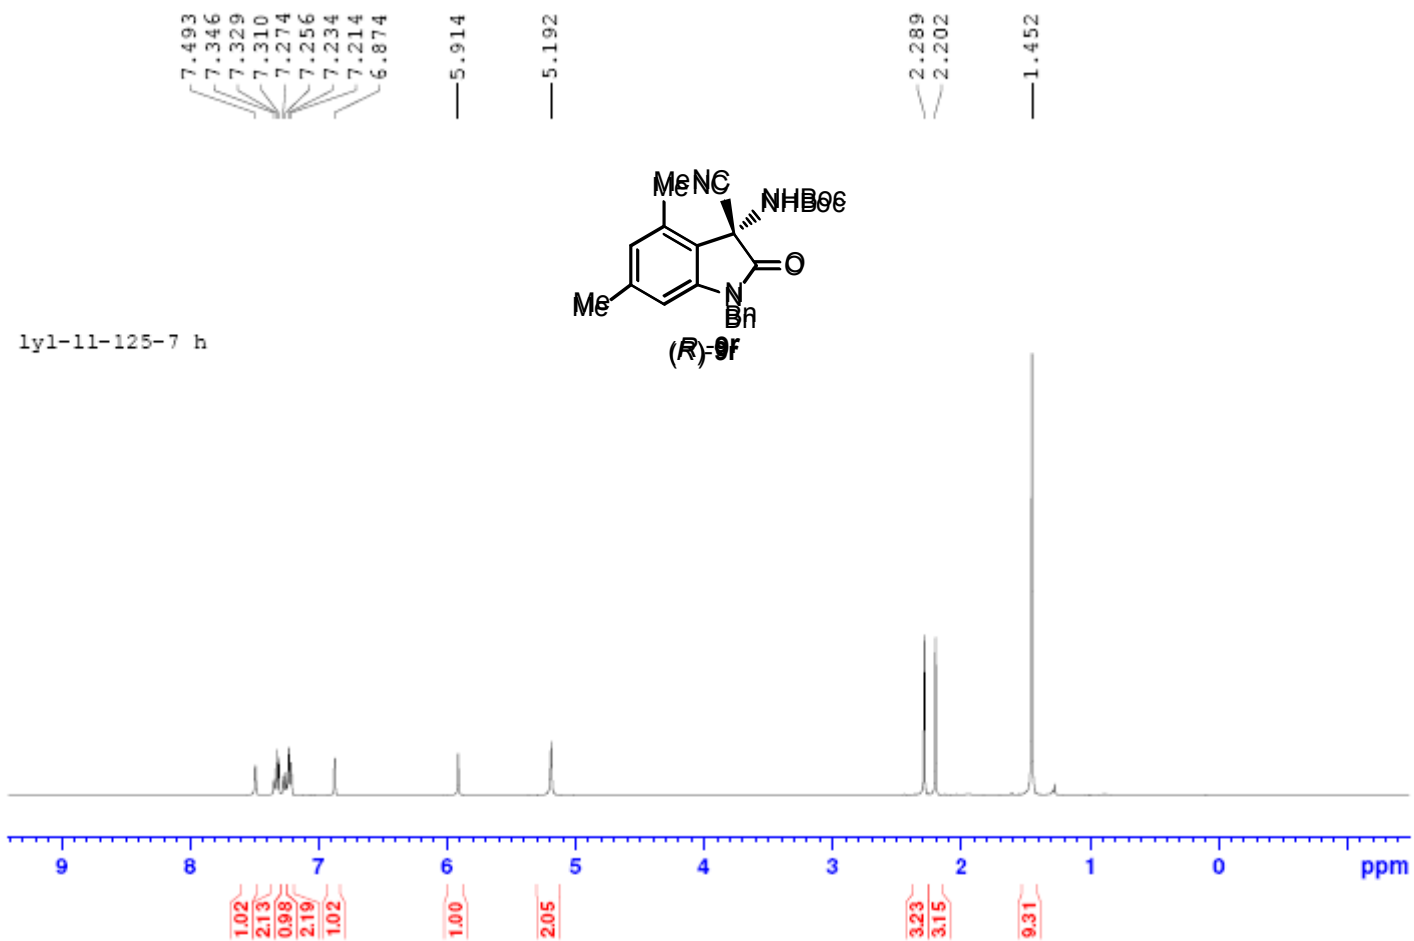

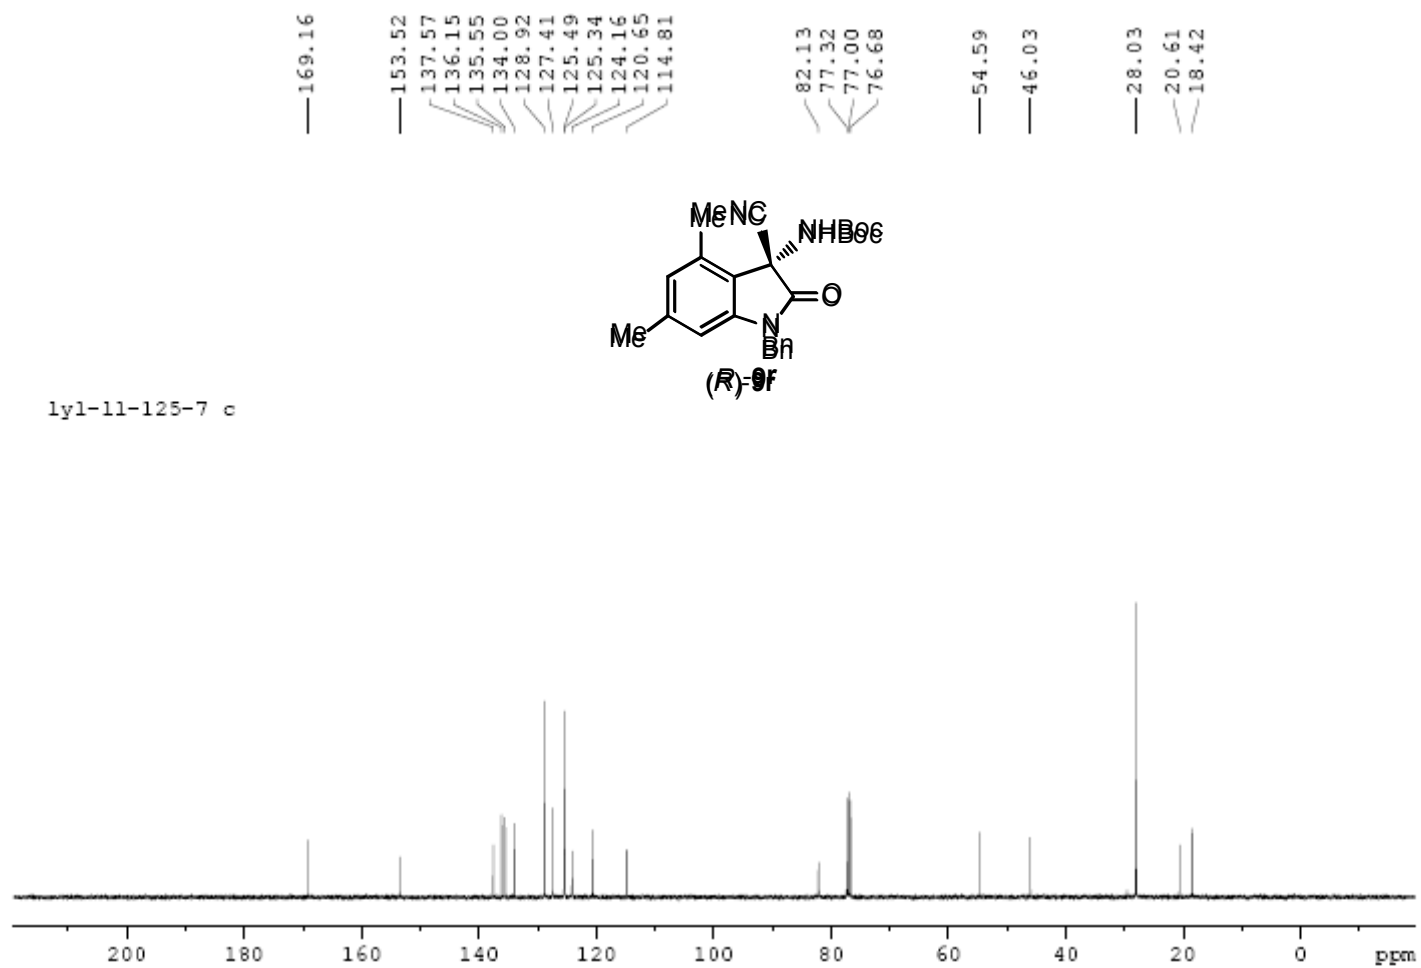

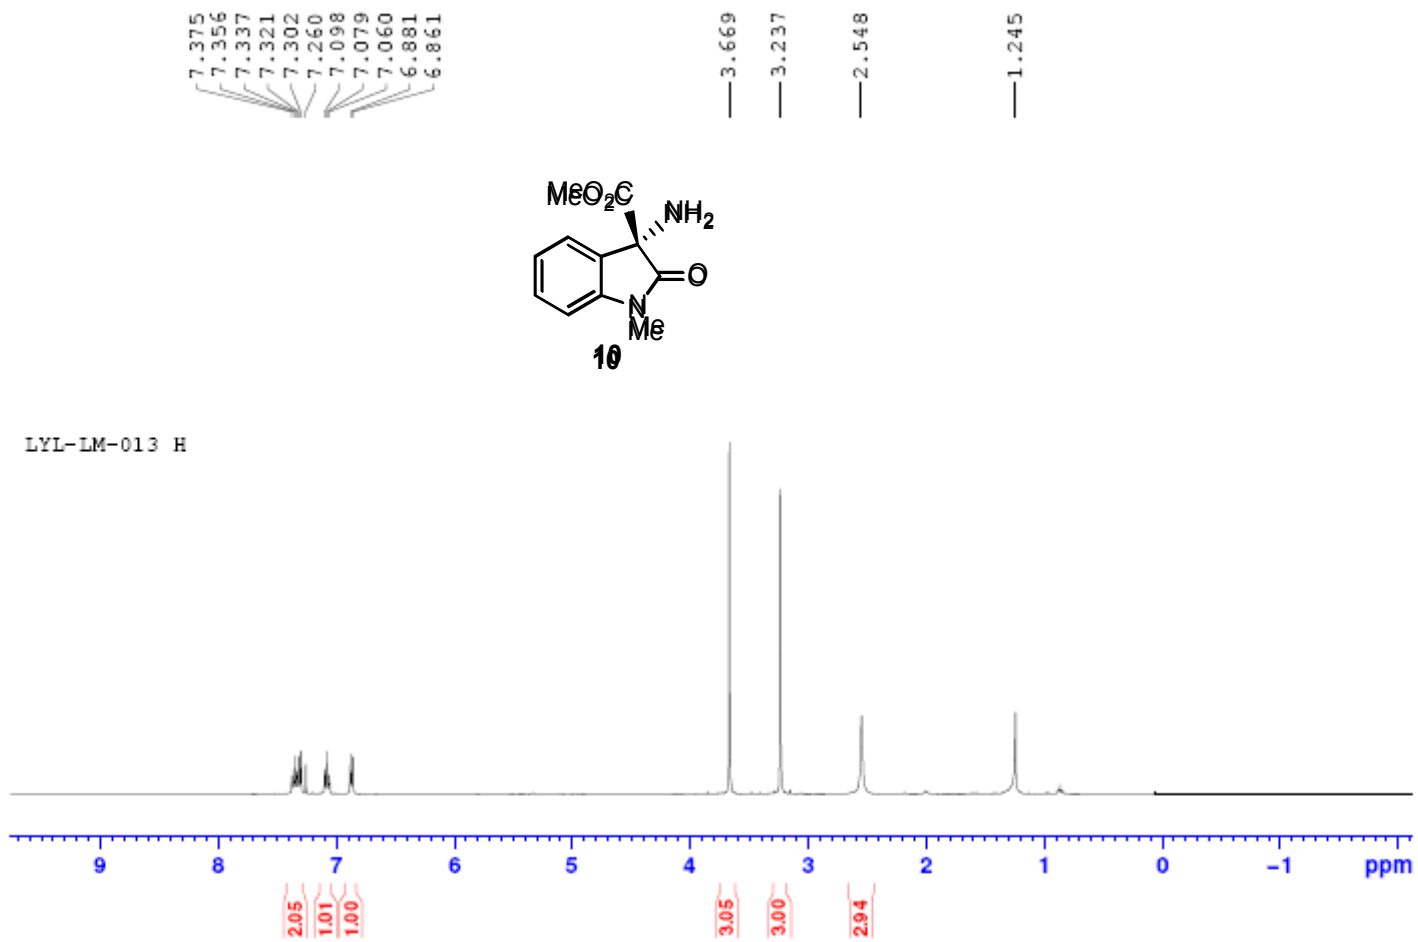

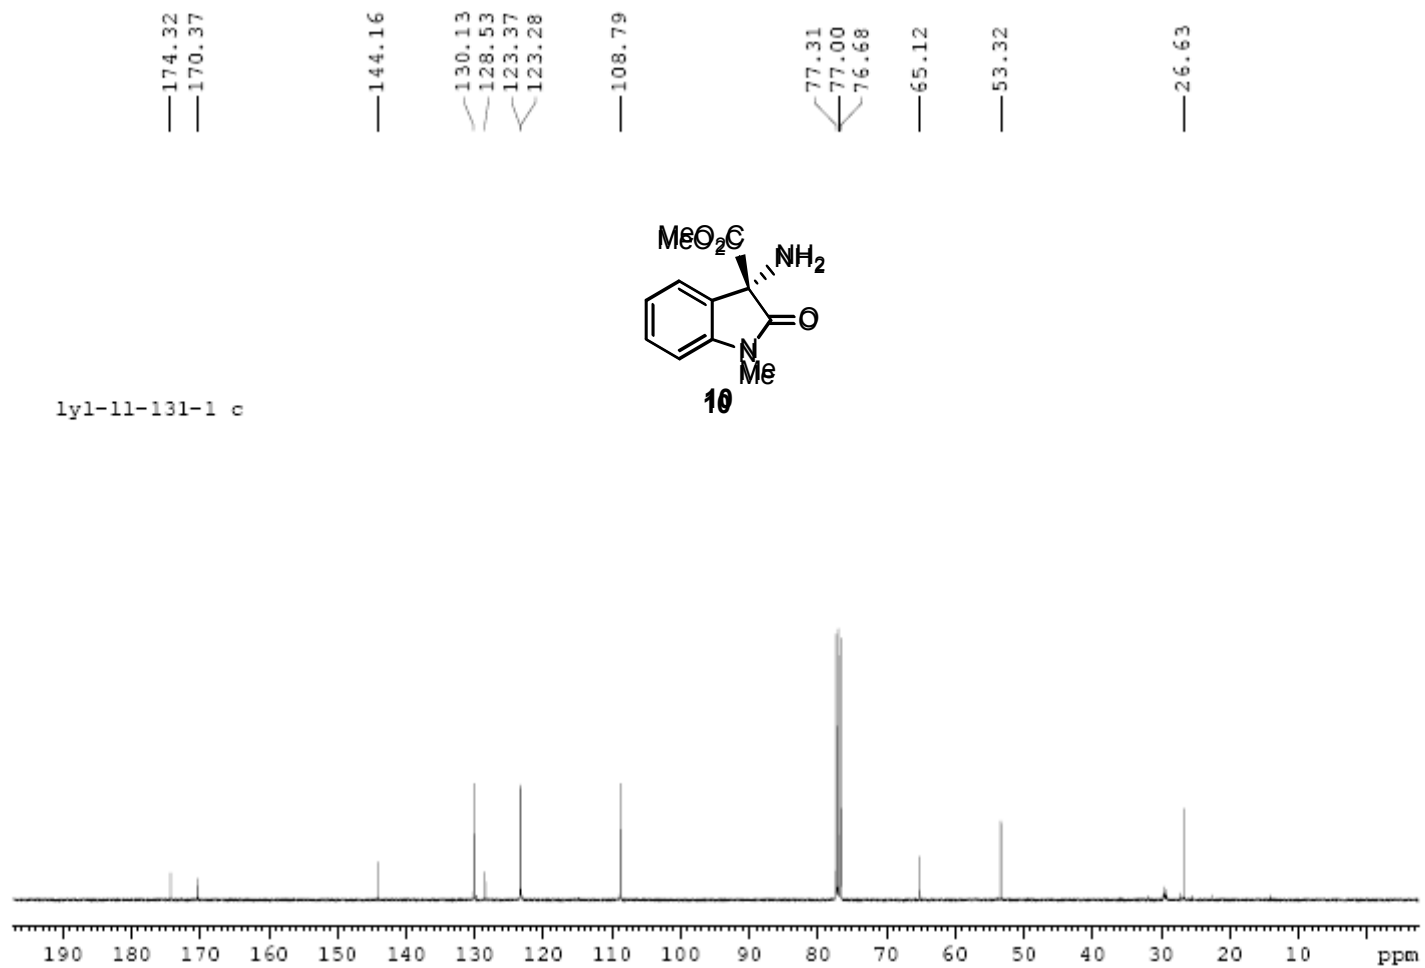

1y1-11-060-1 h

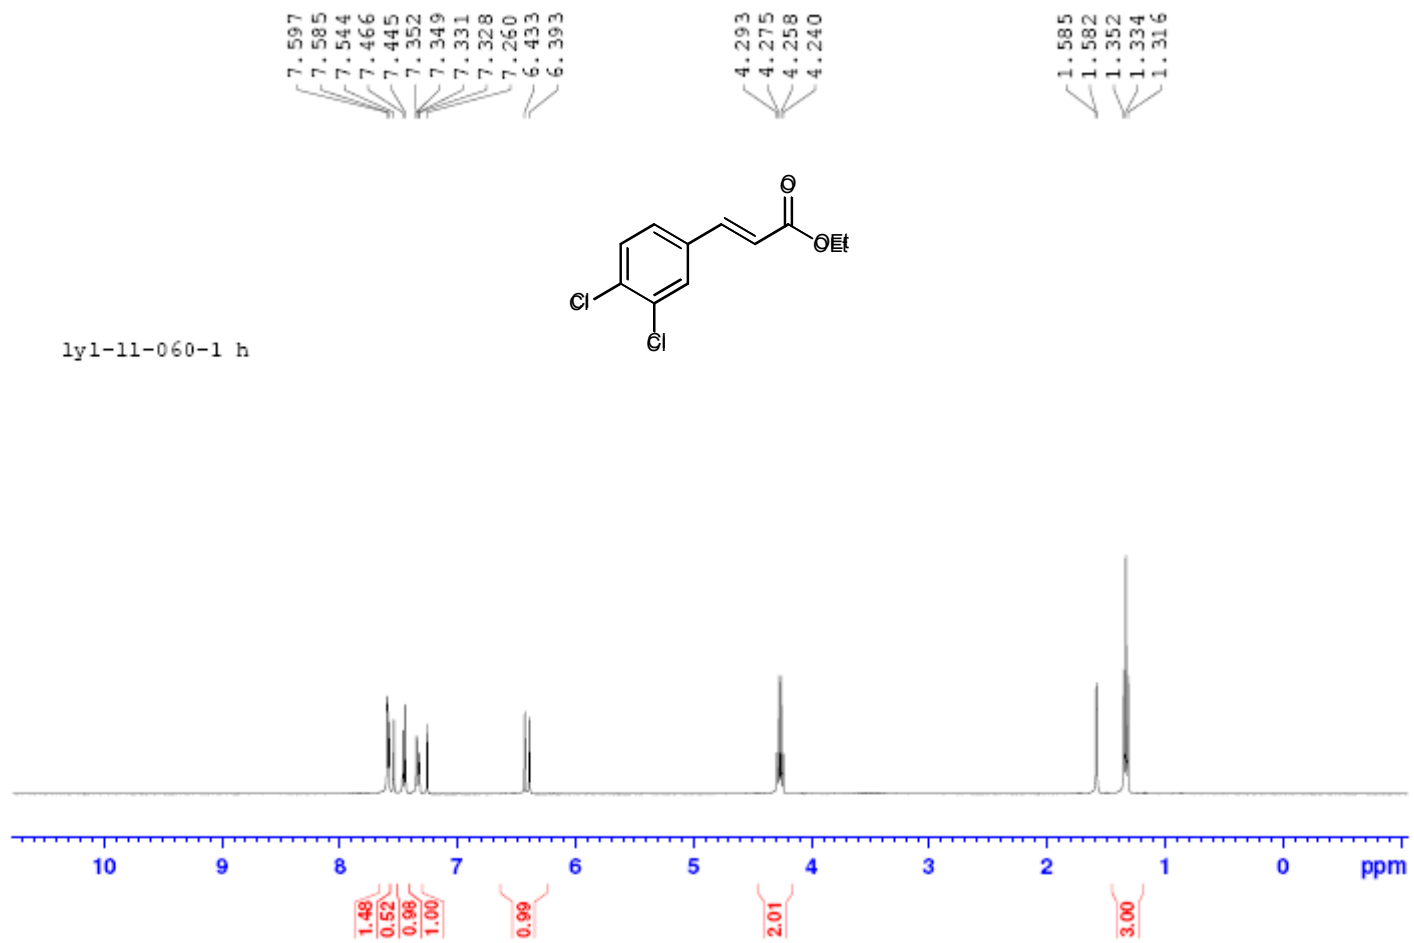



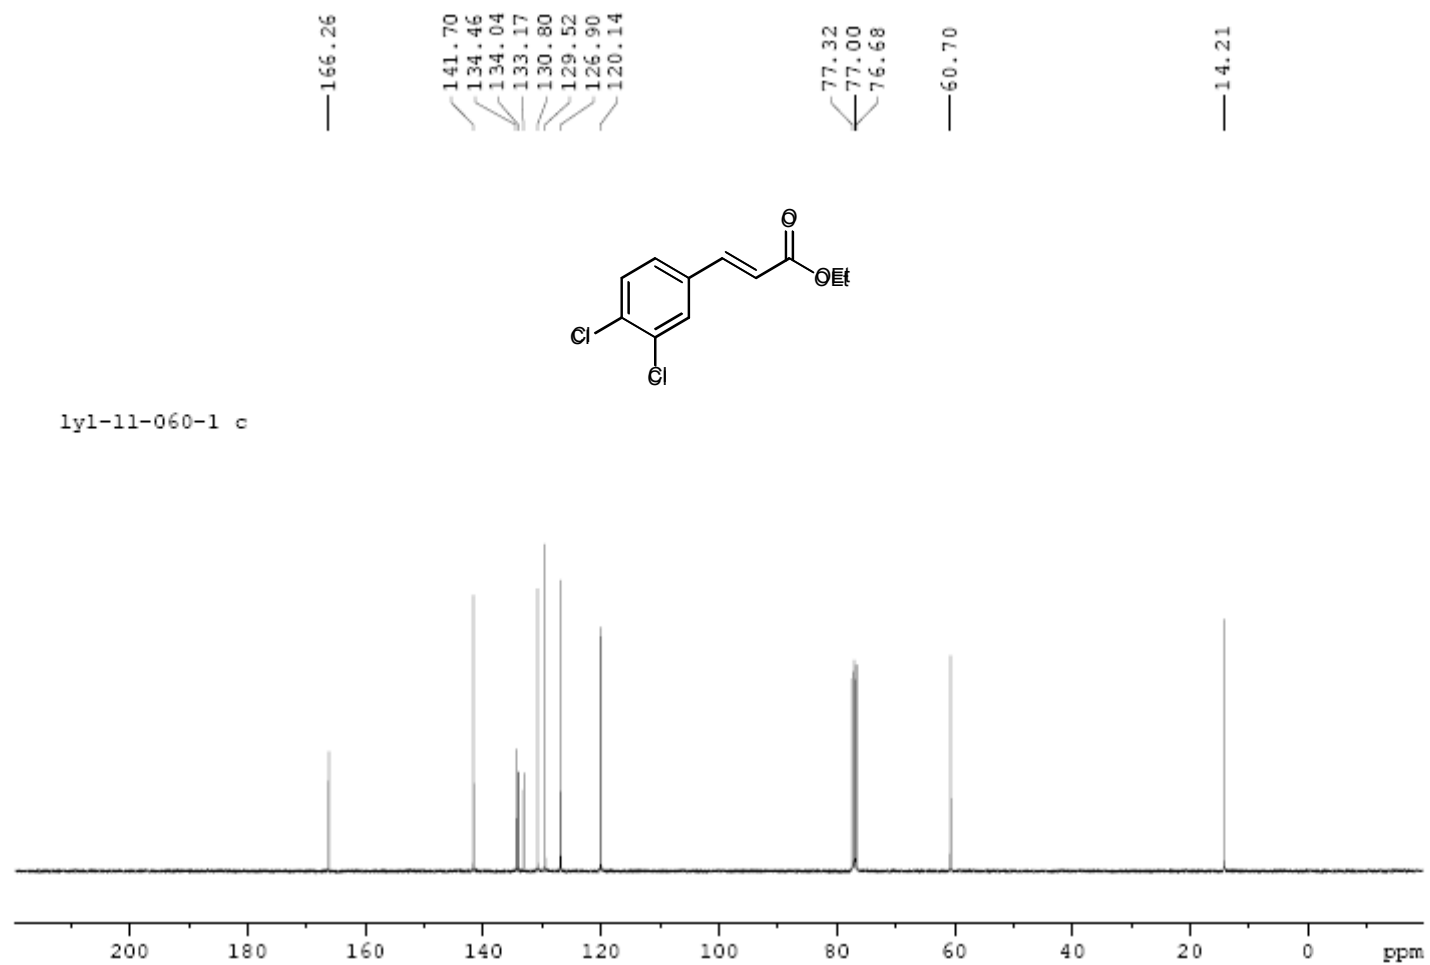

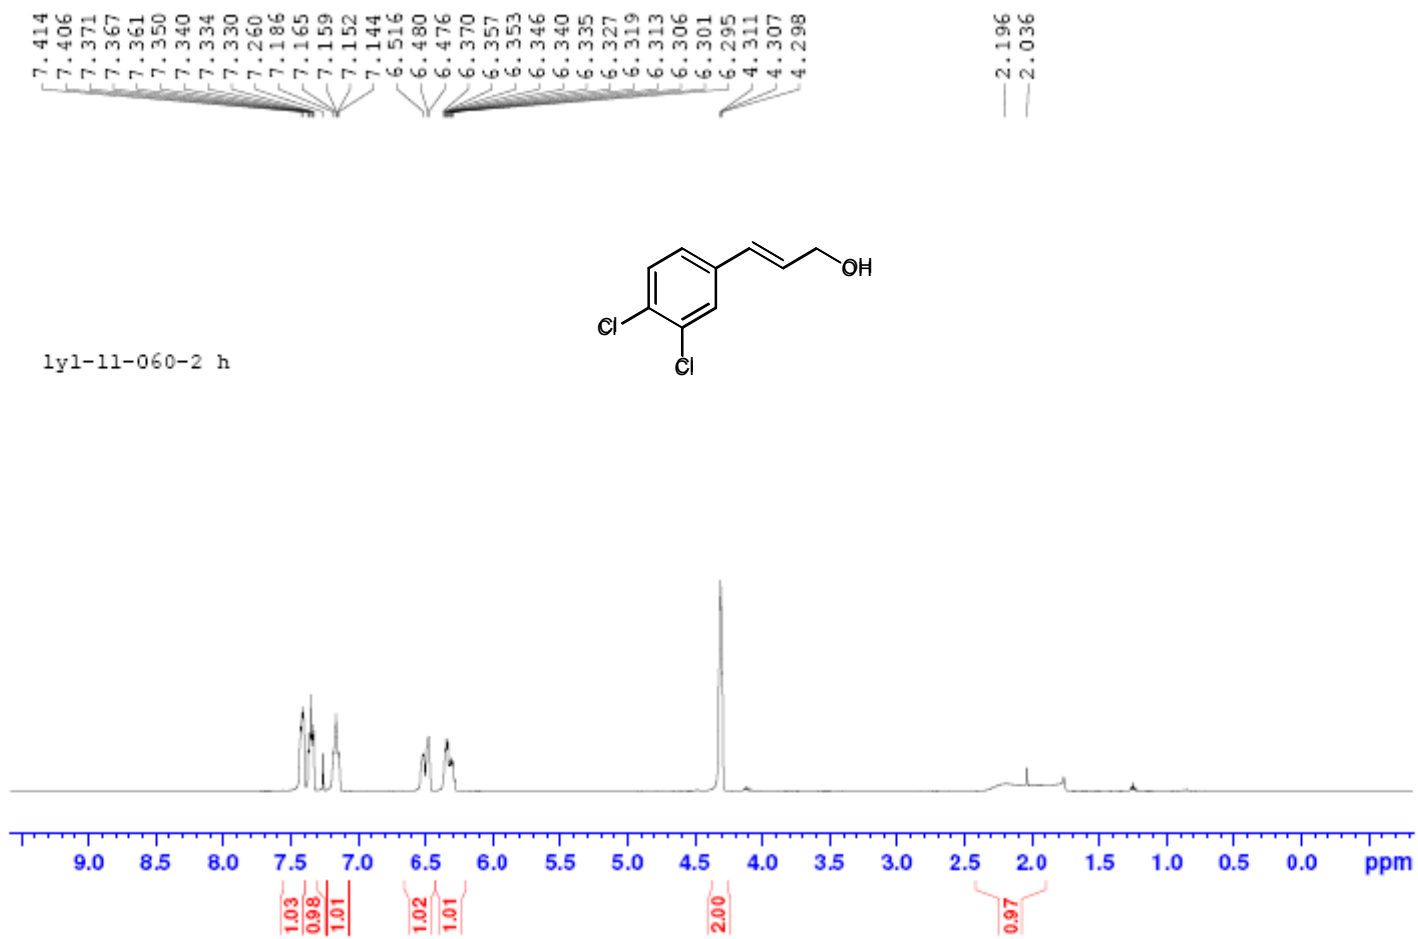

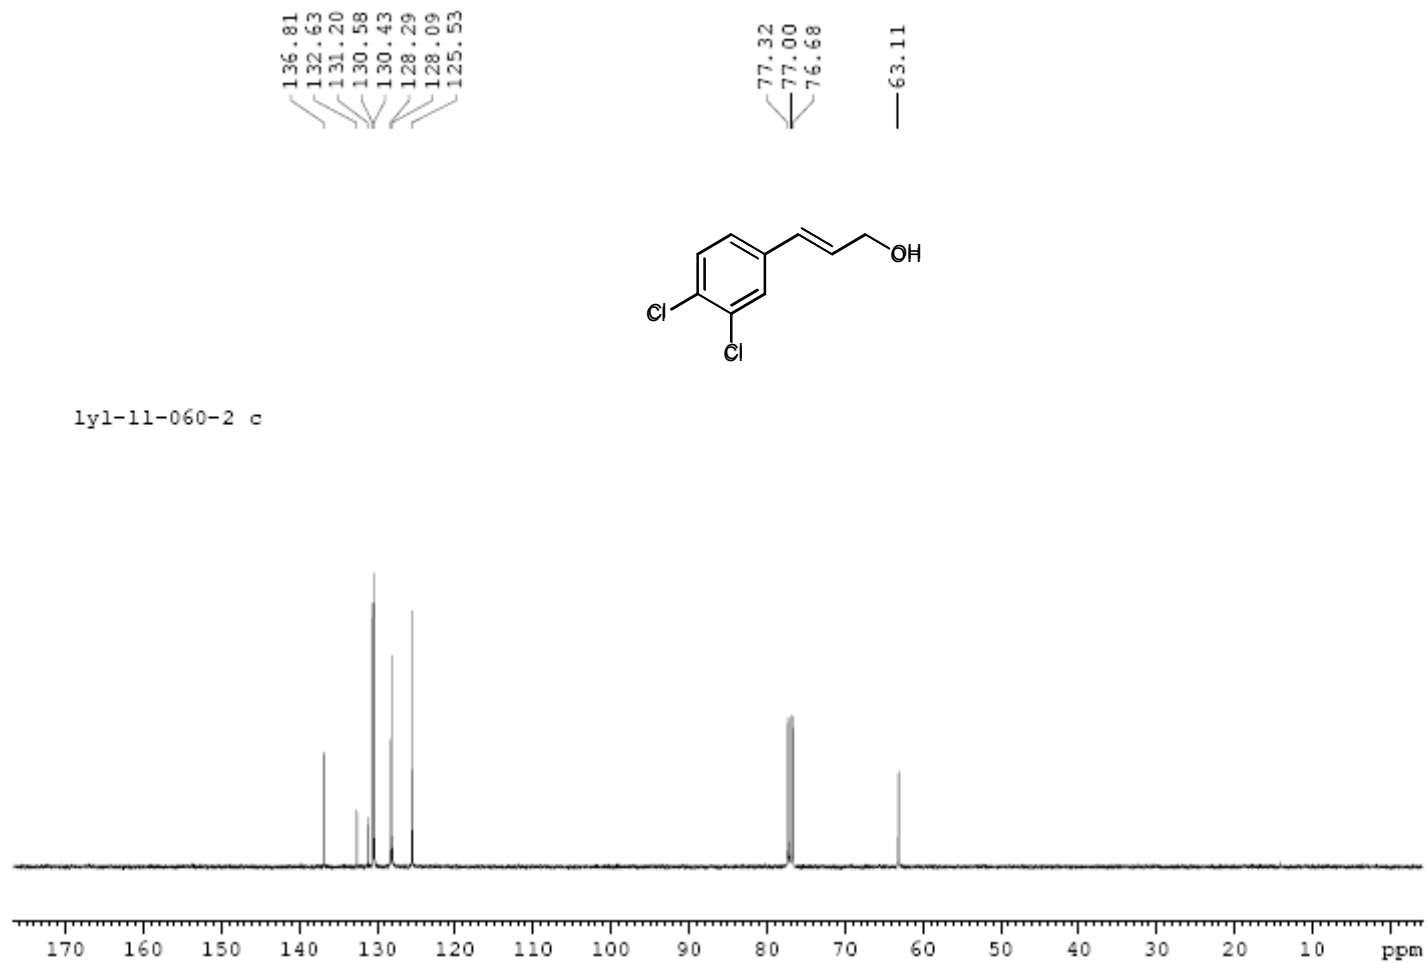

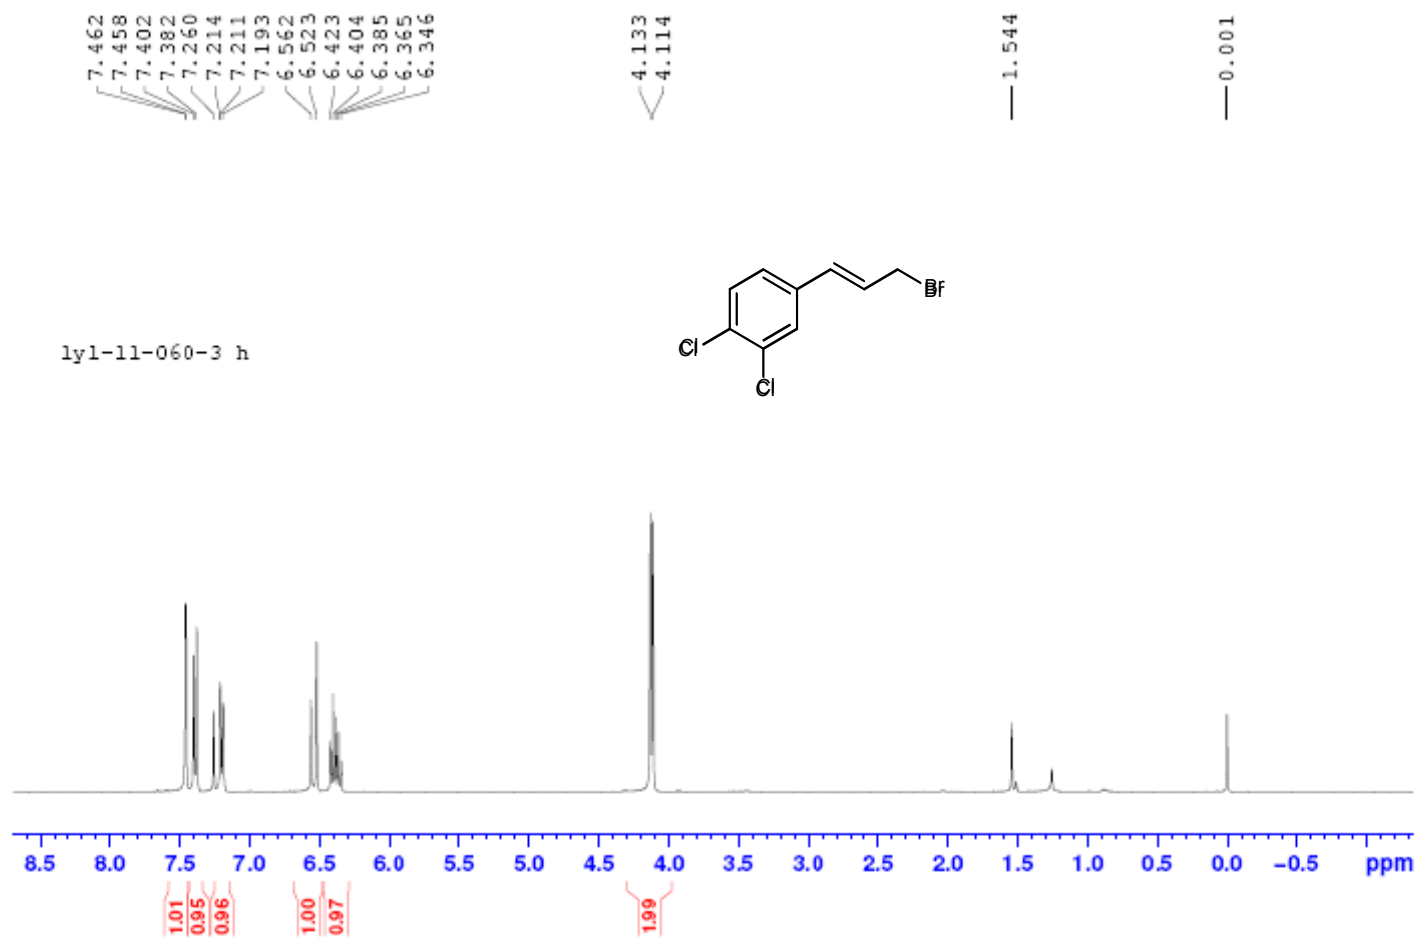

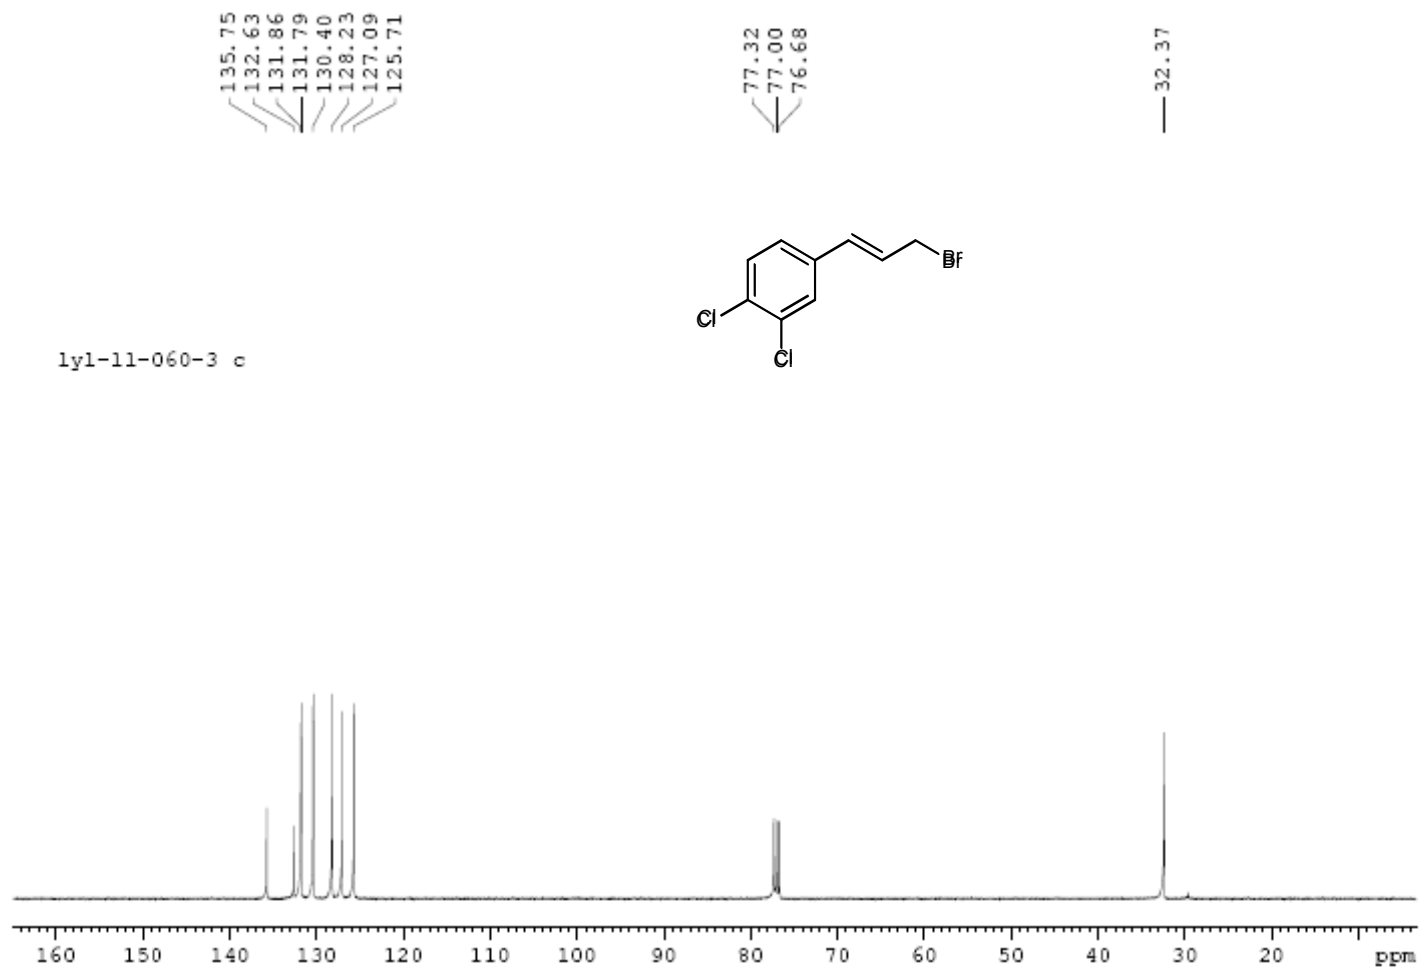

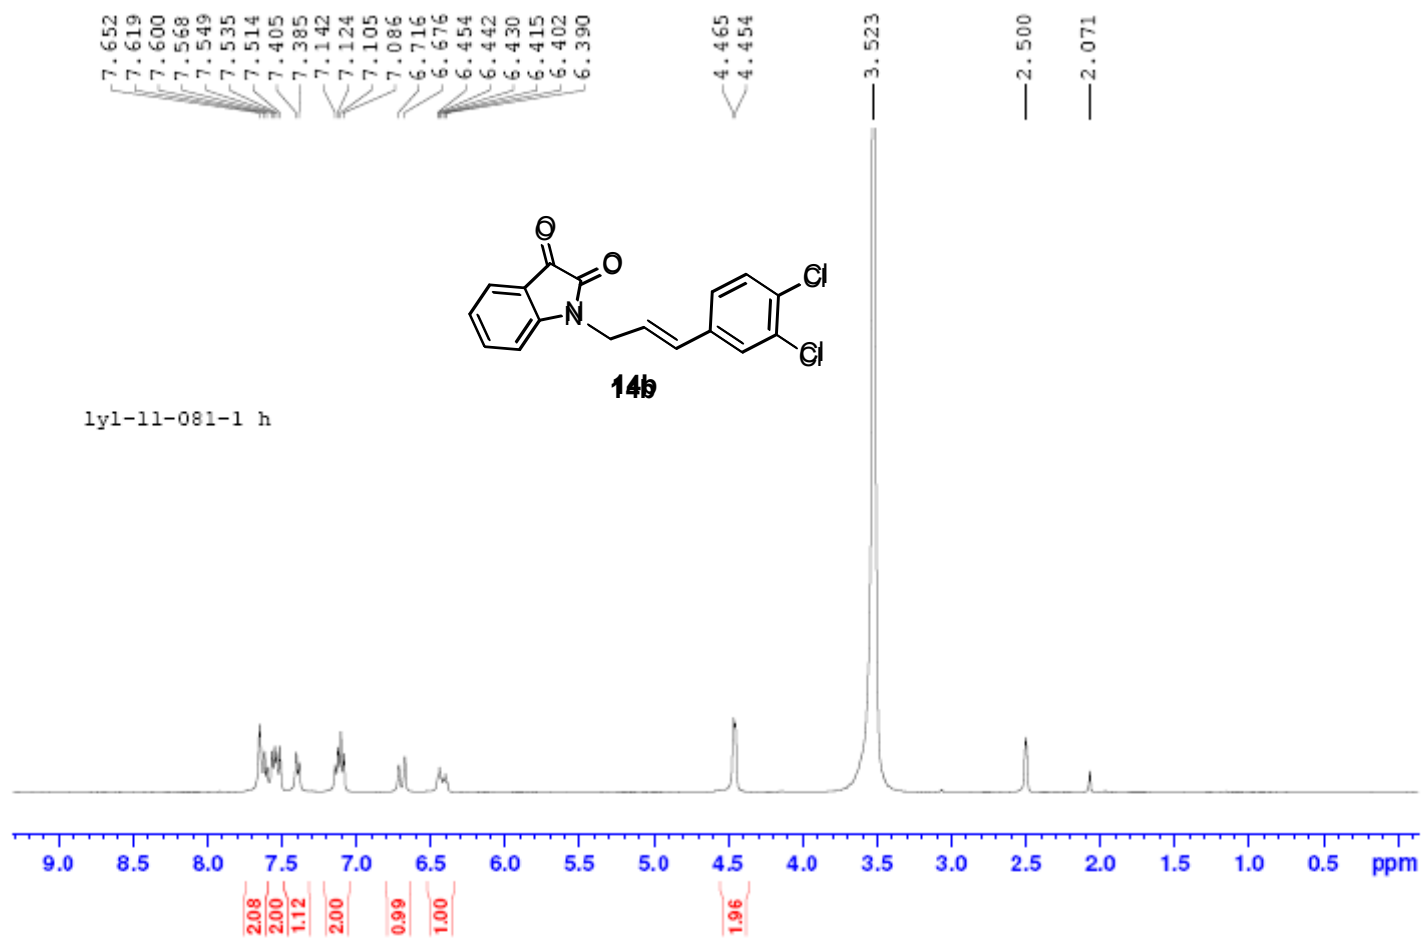

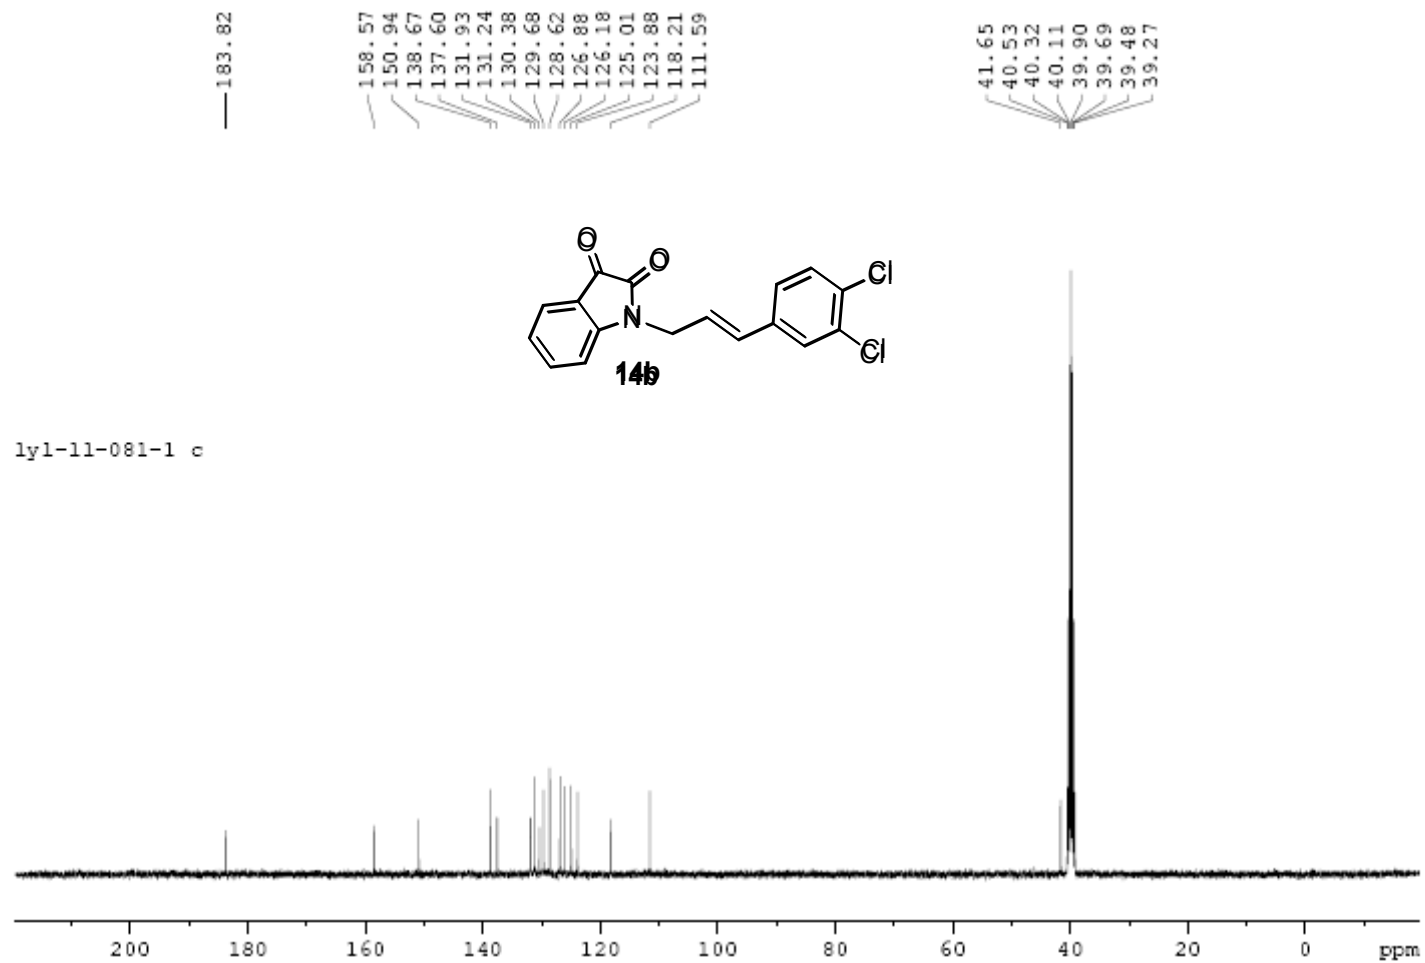

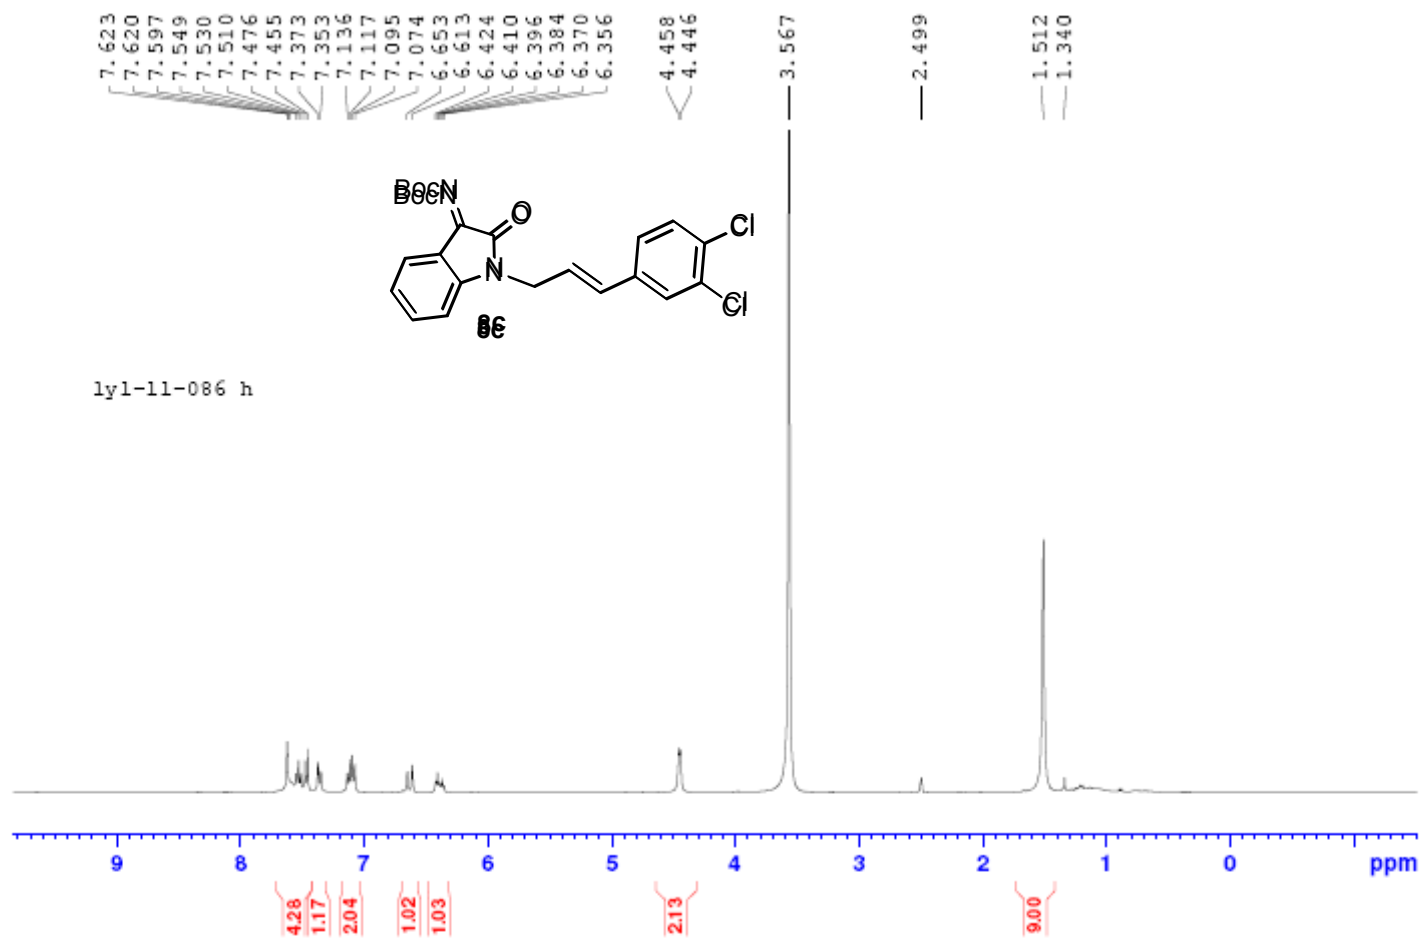



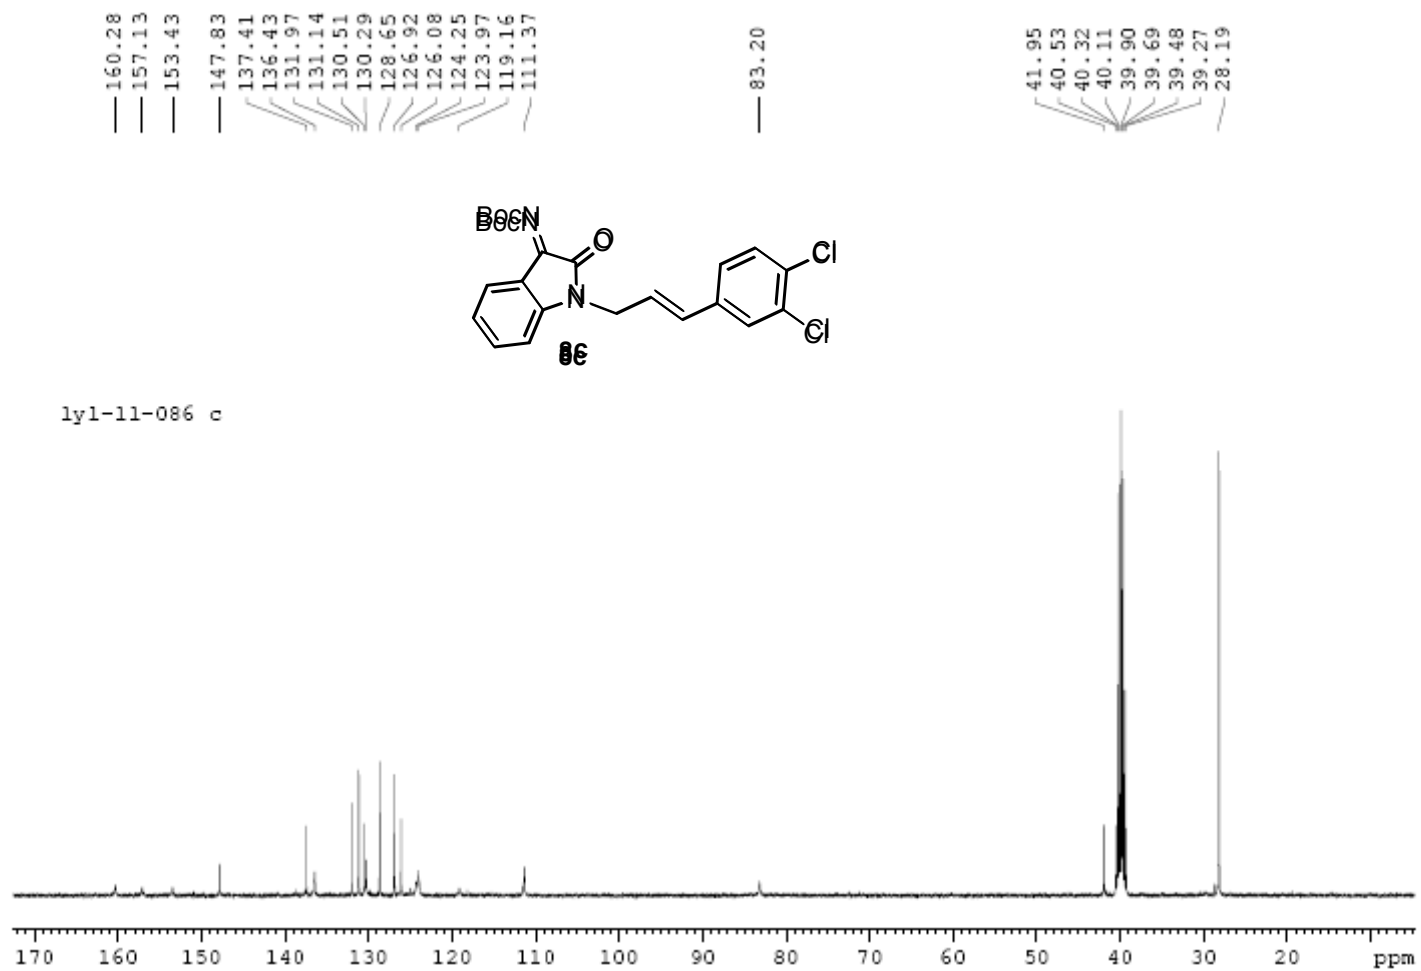

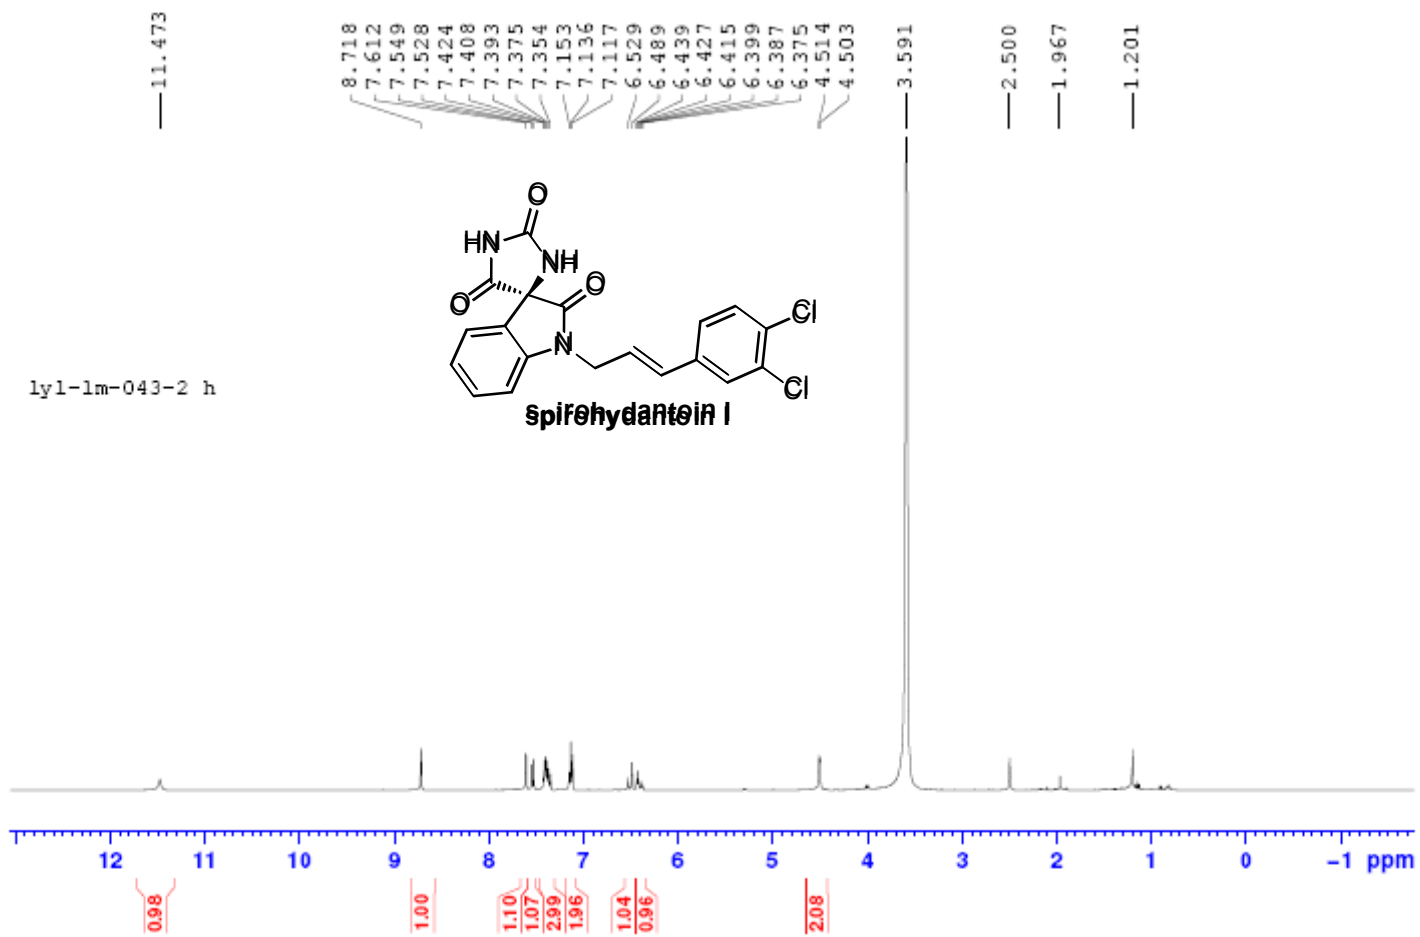

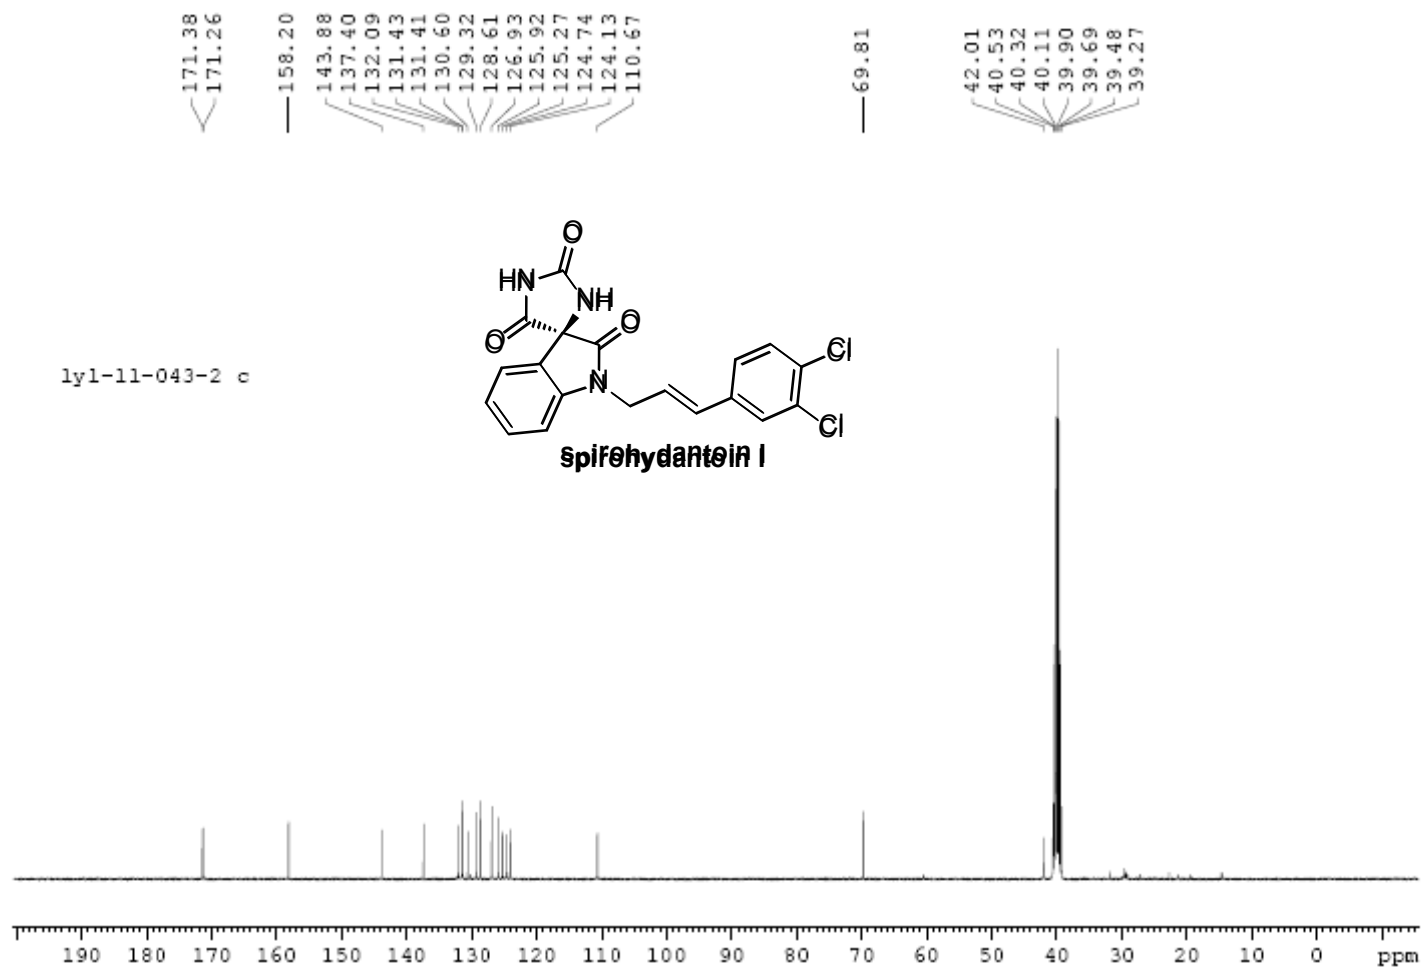

Supplement: c2cc36665g_2.pdf [file c2cc36665g_2.pdf]
