# Supplementary material for: Organocatalytic asymmetric cyanation of isatin derived N-Boc ketoimines
Source: Royal Society of Chemistry journal article supplement (doi:10.1039/c2cc36665g), 2012-10-09
Supplement: c2cc36665g_3.pdf [file c2cc36665g_3.pdf]

# Organocatalytic asymmetric cyanation of isatin derived *N*-Boc ketoimines

Yun-Lin Liu and Jian Zhou\*

Shanghai Key Laboratory of Green Chemistry and Chemical Processes, Department of Chemistry,  
East China Normal University, 3663N Zhongshan Road, Shanghai 200062, China,

*E-mail: jzhou@chem.ecnu.edu.cn*

## Supporting Information

### (Part III)

| Content                                            | Page |
|----------------------------------------------------|------|
| HPLC spectra of product 9a-r, 10, spirohydantoin I | 2-24 |

Operator:del Timebase:U-3000 Sequence:yl

Page 1-1  
 2012-9-4 10:25

3296 Iyl-IM-091-RAC-AD-1.0-85/15-230

|                  |                                 |                   |          |
|------------------|---------------------------------|-------------------|----------|
| Sample Name:     | Iyl-IM-091-RAC-AD-1.0-85/15-230 | Injection Volume: | 20.0     |
| Vial Number:     | 998                             | Channel:          | UV_VI8_1 |
| Sample Type:     | standard                        | Wavelength:       | 230      |
| Control Program: | Liu Yunlin                      | Bandwidth:        | n.a.     |
| Quantif. Method: | Iyl                             | Dilution Factor:  | 1.0000   |
| Recording Time:  | 2012-8-2 21:31                  | Sample Weight:    | 1.0000   |
| Run Time (min):  | 18.84                           | Sample Amount:    | 1.0000   |

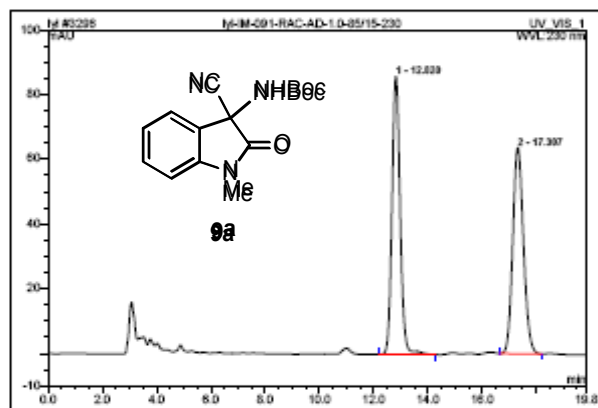

| No.           | RetTime min | Peak Name | Height mAU | Area mAU*min | RelArea % | Amount | Type |
|---------------|-------------|-----------|------------|--------------|-----------|--------|------|
| 1             | 12.82       | n.a.      | 85.995     | 29.852       | 50.67     | n.a.   | SMB  |
| 2             | 17.31       | n.a.      | 63.706     | 29.053       | 49.33     | n.a.   | SMB  |
| <b>Total:</b> |             |           | 149.701    | 58.915       | 100.00    | 0.000  |      |

default/integration

Chromleon (c) Dionex 1996-2005  
 Version 6.80 SR8a Build 2543 (158225)

Operator:del Timebase:U-3000 Sequence:yl

Page 1-1  
 2012-9-6 6:29

3293 Iyl-IM-091-ASY-AD-1.0-85/15-230

|                  |                                 |                   |          |
|------------------|---------------------------------|-------------------|----------|
| Sample Name:     | Iyl-IM-091-ASY-AD-1.0-85/15-230 | Injection Volume: | 20.0     |
| Vial Number:     | 998                             | Channel:          | UV_VI8_1 |
| Sample Type:     | standard                        | Wavelength:       | 230      |
| Control Program: | Liu Yunlin                      | Bandwidth:        | n.a.     |
| Quantif. Method: | Iyl                             | Dilution Factor:  | 1.0000   |
| Recording Time:  | 2012-8-2 20:27                  | Sample Weight:    | 1.0000   |
| Run Time (min):  | 18.43                           | Sample Amount:    | 1.0000   |

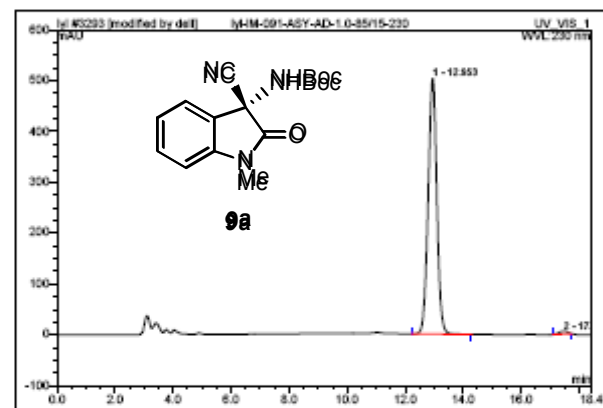

| No.           | RetTime min | Peak Name | Height mAU | Area mAU*min | RelArea % | Amount | Type |
|---------------|-------------|-----------|------------|--------------|-----------|--------|------|
| 1             | 12.95       | n.a.      | 502.805    | 174.206      | 98.87     | n.a.   | SMB  |
| 2             | 17.47       | n.a.      | 5.685      | 1.999        | 1.13      | n.a.   | SMB* |
| <b>Total:</b> |             |           | 508.493    | 176.205      | 100.00    | 0.000  |      |

default/integration

Chromleon (c) Dionex 1996-2005  
 Version 6.80 SR8a Build 2543 (158225)

Operator:deli Timebase:U-3000 Sequence:yl

Page 1-1  
 2012-8-6 6:50

3115 Iyl-II-125-1-RAC-AS-1.0-85/15-230

|                  |                                   |                   |          |
|------------------|-----------------------------------|-------------------|----------|
| Sample Name:     | Iyl-II-125-1-RAC-AS-1.0-85/15-230 | Injection Volume: | 20.0     |
| Vial Number:     | 898                               | Channel:          | UV_VI8_1 |
| Sample Type:     | standard                          | Wavelength:       | 230      |
| Control Program: | Liu Yunlin                        | Bandwidth:        | n.a.     |
| Quantif. Method: | Iyl                               | Dilution Factor:  | 1.0000   |
| Recording Time:  | 2012-8-8 17:37                    | Sample Weight:    | 1.0000   |
| Run Time (min):  | 33.88                             | Sample Amount:    | 1.0000   |

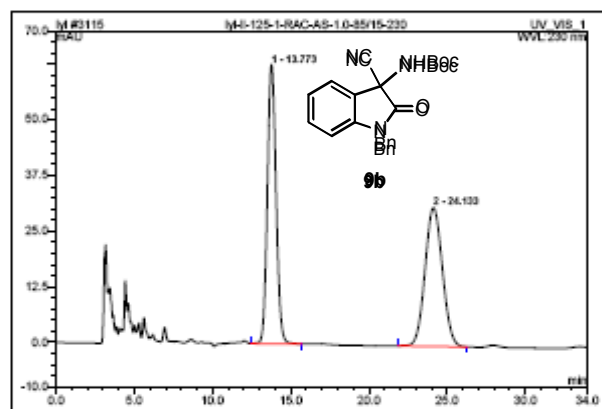

| No.    | RetTime min | Peak Name | Height mAU | Area mAU*min | Rel.Area % | Amount | Type |
|--------|-------------|-----------|------------|--------------|------------|--------|------|
| 1      | 13.77       | n.a.      | 62.804     | 40.451       | 50.13      | n.a.   | BMB  |
| 2      | 24.13       | n.a.      | 31.154     | 40.243       | 49.87      | n.a.   | BMB  |
| Total: |             |           | 93.957     | 80.694       | 100.00     | 0.000  |      |

default/integration

Chromleon (c) Dionex 1996-2005  
 Version 6.80 SR8a Build 2643 (155225)

Operator:deli Timebase:U-3000 Sequence:yl

Page 1-1  
 2012-8-6 6:51

3116 Iyl-II-125-1-ASY-AS-1.0-85/15-230

|                  |                                   |                   |          |
|------------------|-----------------------------------|-------------------|----------|
| Sample Name:     | Iyl-II-125-1-ASY-AS-1.0-85/15-230 | Injection Volume: | 20.0     |
| Vial Number:     | 898                               | Channel:          | UV_VI8_1 |
| Sample Type:     | standard                          | Wavelength:       | 230      |
| Control Program: | Liu Yunlin                        | Bandwidth:        | n.a.     |
| Quantif. Method: | Iyl                               | Dilution Factor:  | 1.0000   |
| Recording Time:  | 2012-8-8 18:12                    | Sample Weight:    | 1.0000   |
| Run Time (min):  | 27.37                             | Sample Amount:    | 1.0000   |

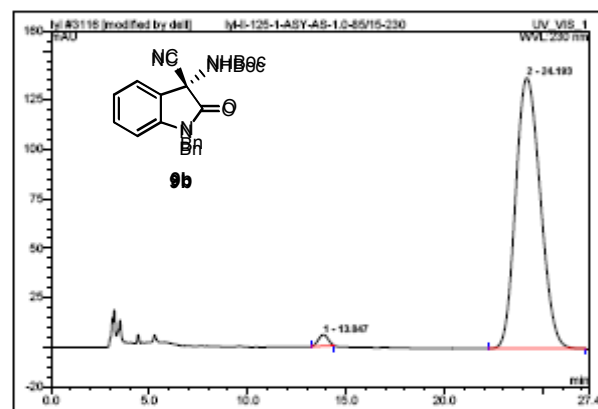

| No.    | RetTime min | Peak Name | Height mAU | Area mAU*min | Rel.Area % | Amount | Type |
|--------|-------------|-----------|------------|--------------|------------|--------|------|
| 1      | 13.86       | n.a.      | 5.705      | 3.262        | 1.61       | n.a.   | BMB  |
| 2      | 24.19       | n.a.      | 136.913    | 198.799      | 98.39      | n.a.   | BMB  |
| Total: |             |           | 142.618    | 202.061      | 100.00     | 0.000  |      |

default/integration

Chromleon (c) Dionex 1996-2005  
 Version 6.80 SR8a Build 2643 (155225)

Operator: dell Timebase: U-3000 Sequence: (j)

Page 1-1  
 2012-8-11 11:25

3141 Iyl-II-126-1-rac-AD-1.0-85/15-230

|                  |                                   |                   |          |
|------------------|-----------------------------------|-------------------|----------|
| Sample Name:     | Iyl-II-126-1-rac-AD-1.0-85/15-230 | Injection Volume: | 20.0     |
| Vial Number:     | 898                               | Channel:          | UV_VI8_1 |
| Sample Type:     | standard                          | Wavelength:       | 230      |
| Control Program: | Liu Yunlin                        | Bandwidth:        | n.a.     |
| Quantif. Method: | Iyl                               | Dilution Factor:  | 1.0000   |
| Recording Time:  | 2012-8-11 10:44                   | Sample Weight:    | 1.0000   |
| Run Time (min):  | 17.36                             | Sample Amount:    | 1.0000   |

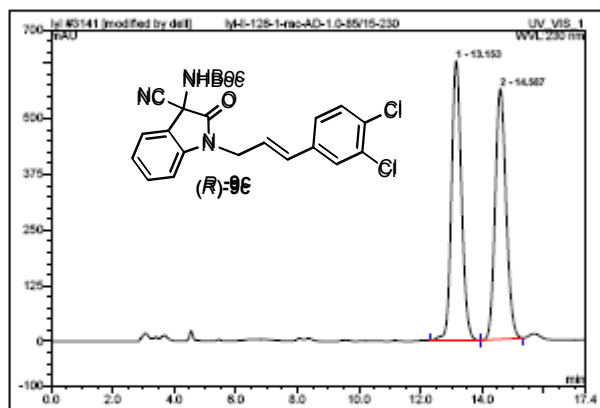

| No.    | RetTime min | Peak Name | Height mAU | Area mAU/min | Rel.Area % | Amount | Type |
|--------|-------------|-----------|------------|--------------|------------|--------|------|
| 1      | 13.15       | n.a.      | 628.368    | 236.494      | 50.53      | n.a.   | BMB* |
| 2      | 14.55       | n.a.      | 563.041    | 231.522      | 49.47      | n.a.   | BMB* |
| Total: |             |           | 1191.410   | 468.016      | 100.00     | 0.000  |      |

default/integration

Chromleon (c) Dionex 1996-2005  
 Version 6.80 SR8a Build 2643 (155225)

Operator: dell Timebase: U-3000 Sequence: (j)

Page 1-1  
 2012-8-11 11:25

3142 Iyl-II-126-1-asy-AD-1.0-85/15-230

|                  |                                   |                   |          |
|------------------|-----------------------------------|-------------------|----------|
| Sample Name:     | Iyl-II-126-1-asy-AD-1.0-85/15-230 | Injection Volume: | 20.0     |
| Vial Number:     | 898                               | Channel:          | UV_VI8_1 |
| Sample Type:     | standard                          | Wavelength:       | 230      |
| Control Program: | Liu Yunlin                        | Bandwidth:        | n.a.     |
| Quantif. Method: | Iyl                               | Dilution Factor:  | 1.0000   |
| Recording Time:  | 2012-8-11 11:04                   | Sample Weight:    | 1.0000   |
| Run Time (min):  | 16.93                             | Sample Amount:    | 1.0000   |

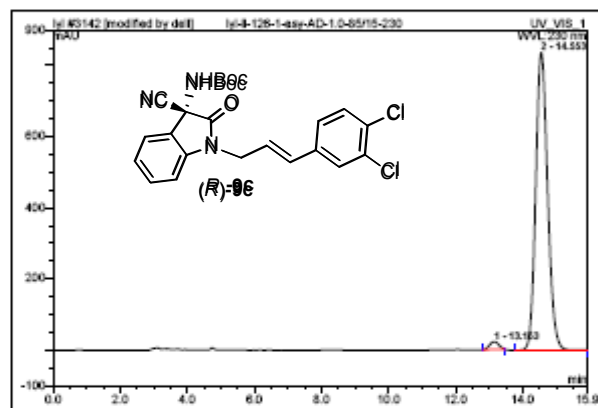

| No.    | RetTime min | Peak Name | Height mAU | Area mAU/min | Rel.Area % | Amount | Type |
|--------|-------------|-----------|------------|--------------|------------|--------|------|
| 1      | 13.15       | n.a.      | 22.137     | 6.960        | 1.98       | n.a.   | BMB* |
| 2      | 14.55       | n.a.      | 836.796    | 344.959      | 98.02      | n.a.   | BMB* |
| Total: |             |           | 858.933    | 351.939      | 100.00     | 0.000  |      |

default/integration

Chromleon (c) Dionex 1996-2005  
 Version 6.80 SR8a Build 2643 (155225)

Operator:deli Timebase:U-3000 Sequence:(j)

Page 1-1  
 2012-9-4 9:57

3237 Iyl-Im-015-RAC-AD-1.0-85/15-230

|                  |                                 |                   |          |
|------------------|---------------------------------|-------------------|----------|
| Sample Name:     | Iyl-Im-016-RAC-AD-1.0-85/15-230 | Injection Volume: | 20.0     |
| Vial Number:     | 898                             | Channel:          | UV_VI8_1 |
| Sample Type:     | standard                        | Wavelength:       | 230      |
| Control Program: | Liu Yunlin                      | Bandwidth:        | n.a.     |
| Quantif. Method: | Iyl                             | Dilution Factor:  | 1.0000   |
| Recording Time:  | 2012-8-22 16:41                 | Sample Weight:    | 1.0000   |
| Run Time (min):  | 20.26                           | Sample Amount:    | 1.0000   |

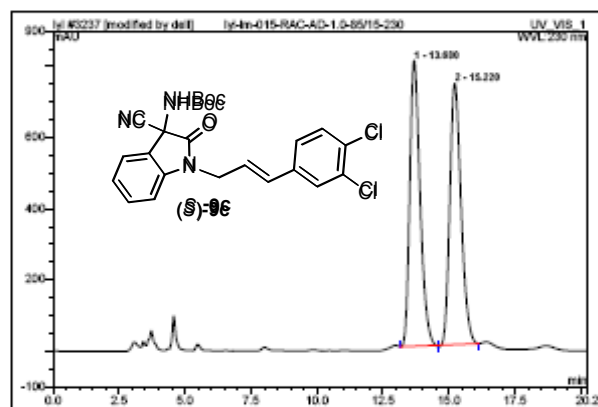

| No.    | RetTime min | Peak Name | Height mAU | Area mAU/min | Rel.Area % | Amount | Type |
|--------|-------------|-----------|------------|--------------|------------|--------|------|
| 1      | 13.68       | n.a.      | 803.591    | 364.262      | 50.15      | n.a.   | BM*  |
| 2      | 15.22       | n.a.      | 734.355    | 362.189      | 49.85      | n.a.   | MB*  |
| Total: |             |           | 1537.946   | 726.451      | 100.00     | 0.000  |      |

default/integration

Chromleon (c) Dionex 1996-2005  
 Version 6.80 SR8a Build 2643 (158225)

Operator:deli Timebase:U-3000 Sequence:(j)

Page 1-1  
 2012-9-4 9:56

3236 Iyl-Im-015-asy-AD-1.0-85/15-230

|                  |                                 |                   |          |
|------------------|---------------------------------|-------------------|----------|
| Sample Name:     | Iyl-Im-015-asy-AD-1.0-85/15-230 | Injection Volume: | 20.0     |
| Vial Number:     | 898                             | Channel:          | UV_VI8_1 |
| Sample Type:     | standard                        | Wavelength:       | 230      |
| Control Program: | Liu Yunlin                      | Bandwidth:        | n.a.     |
| Quantif. Method: | Iyl                             | Dilution Factor:  | 1.0000   |
| Recording Time:  | 2012-8-22 16:21                 | Sample Weight:    | 1.0000   |
| Run Time (min):  | 17.24                           | Sample Amount:    | 1.0000   |

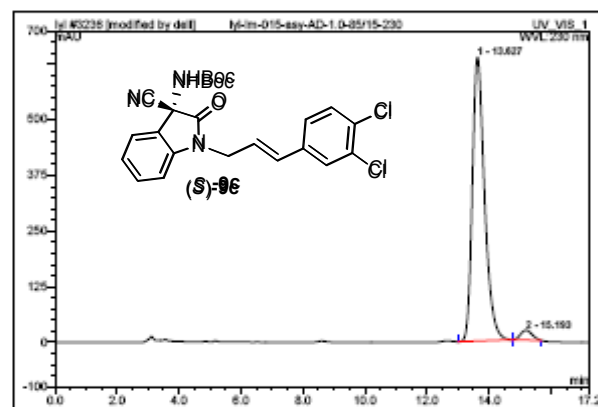

| No.    | RetTime min | Peak Name | Height mAU | Area mAU/min | Rel.Area % | Amount | Type |
|--------|-------------|-----------|------------|--------------|------------|--------|------|
| 1      | 13.63       | n.a.      | 638.238    | 291.181      | 96.82      | n.a.   | BMB* |
| 2      | 15.19       | n.a.      | 22.243     | 9.573        | 3.18       | n.a.   | BMB* |
| Total: |             |           | 660.481    | 300.754      | 100.00     | 0.000  |      |

default/integration

Chromleon (c) Dionex 1996-2005  
 Version 6.80 SR8a Build 2643 (158225)

Operator:deli Timebase:U-3000 Sequence:yl

Page 1-1  
 2012-8-6 2:32

3108 Iyl-II-123-1-RAC-AD-1.0-85/15-230

|                  |                                   |                   |          |
|------------------|-----------------------------------|-------------------|----------|
| Sample Name:     | Iyl-II-123-1-RAC-AD-1.0-85/15-230 | Injection Volume: | 20.0     |
| Vial Number:     | 898                               | Channel:          | UV_VI8_1 |
| Sample Type:     | standard                          | Wavelength:       | 230      |
| Control Program: | Liu Yunlin                        | Bandwidth:        | n.a.     |
| Quantif. Method: | Iyl                               | Dilution Factor:  | 1.0000   |
| Recording Time:  | 2012-8-8 13:04                    | Sample Weight:    | 1.0000   |
| Run Time (min):  | 16.38                             | Sample Amount:    | 1.0000   |

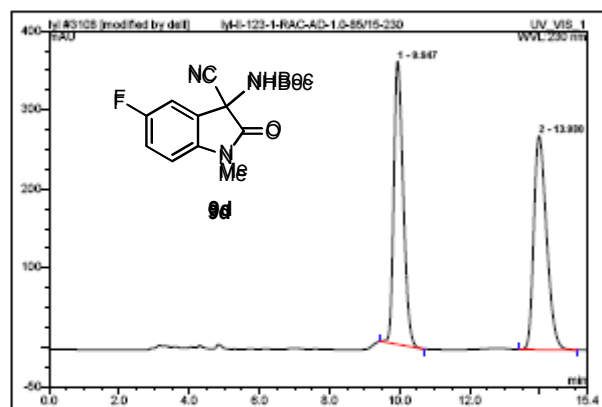

| No.    | RetTime min | Peak Name | Height mAU | Area mAU/min | Rel.Area % | Amount | Type |
|--------|-------------|-----------|------------|--------------|------------|--------|------|
| 1      | 9.95        | n.a.      | 357.972    | 111.052      | 49.34      | n.a.   | SMB* |
| 2      | 13.98       | n.a.      | 270.452    | 114.046      | 50.66      | n.a.   | SMB  |
| Total: |             |           | 628.324    | 225.108      | 100.00     | 0.000  |      |

default/integration

Chromleon (c) Dionex 1996-2005  
 Version 6.80 SR8a Build 2643 (155225)

Operator:deli Timebase:U-3000 Sequence:yl

Page 1-1  
 2012-8-6 1:08

3105 Iyl-II-123-1-ASY-AD-1.0-85/15-230

|                  |                                   |                   |          |
|------------------|-----------------------------------|-------------------|----------|
| Sample Name:     | Iyl-II-123-1-ASY-AD-1.0-85/15-230 | Injection Volume: | 20.0     |
| Vial Number:     | 898                               | Channel:          | UV_VI8_1 |
| Sample Type:     | standard                          | Wavelength:       | 230      |
| Control Program: | Liu Yunlin                        | Bandwidth:        | n.a.     |
| Quantif. Method: | Iyl                               | Dilution Factor:  | 1.0000   |
| Recording Time:  | 2012-8-8 12:15                    | Sample Weight:    | 1.0000   |
| Run Time (min):  | 14.88                             | Sample Amount:    | 1.0000   |

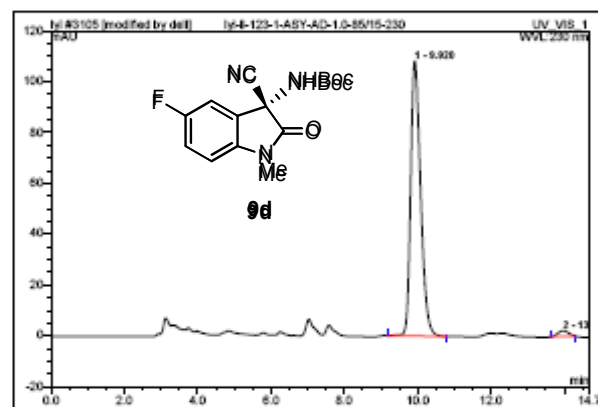

| No.    | RetTime min | Peak Name | Height mAU | Area mAU/min | Rel.Area % | Amount | Type |
|--------|-------------|-----------|------------|--------------|------------|--------|------|
| 1      | 9.92        | n.a.      | 108.214    | 33.896       | 97.87      | n.a.   | SMB  |
| 2      | 13.97       | n.a.      | 2.217      | 0.737        | 2.13       | n.a.   | SMB* |
| Total: |             |           | 110.431    | 34.633       | 100.00     | 0.000  |      |

default/integration

Chromleon (c) Dionex 1996-2005  
 Version 6.80 SR8a Build 2643 (155225)

Operator: dell Timebase: U-3000 Sequence: (j)

Page 1-1  
 2012-8-6 1:07

3106 Iyl-II-123-2-RAC-AD-1.0-85/15-230

|                  |                                   |                   |          |
|------------------|-----------------------------------|-------------------|----------|
| Sample Name:     | Iyl-II-123-2-RAC-AD-1.0-85/15-230 | Injection Volume: | 20.0     |
| Vial Number:     | 898                               | Channel:          | UV_VI8_1 |
| Sample Type:     | standard                          | Wavelength:       | 230      |
| Control Program: | Liu Yunlin                        | Bandwidth:        | n.a.     |
| Quantif. Method: | Iyl                               | Dilution Factor:  | 1.0000   |
| Recording Time:  | 2012-8-8 12:30                    | Sample Weight:    | 1.0000   |
| Run Time (min):  | 18.18                             | Sample Amount:    | 1.0000   |

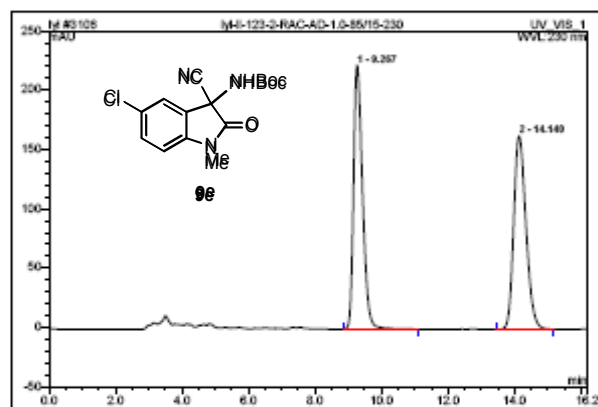

| No.           | RetTime min | Peak Name | Height mAU     | Area mAU/min   | Rel.Area %    | Amount       | Type |
|---------------|-------------|-----------|----------------|----------------|---------------|--------------|------|
| 1             | 9.27        | n.a.      | 222.575        | 69.650         | 90.03         | n.a.         | SMB  |
| 2             | 14.14       | n.a.      | 163.022        | 69.577         | 49.97         | n.a.         | SMB  |
| <b>Total:</b> |             |           | <b>385.597</b> | <b>139.227</b> | <b>100.00</b> | <b>0.000</b> |      |

default/integration

Chromleon (c) Dionex 1996-2005  
 Version 6.80 SR8a Build 2643 (155225)

Operator: dell Timebase: U-3000 Sequence: (j)

Page 1-1  
 2012-8-6 1:08

3107 Iyl-II-123-2-ASY-AD-1.0-85/15-230

|                  |                                   |                   |          |
|------------------|-----------------------------------|-------------------|----------|
| Sample Name:     | Iyl-II-123-2-ASY-AD-1.0-85/15-230 | Injection Volume: | 20.0     |
| Vial Number:     | 898                               | Channel:          | UV_VI8_1 |
| Sample Type:     | standard                          | Wavelength:       | 230      |
| Control Program: | Liu Yunlin                        | Bandwidth:        | n.a.     |
| Quantif. Method: | Iyl                               | Dilution Factor:  | 1.0000   |
| Recording Time:  | 2012-8-8 12:48                    | Sample Weight:    | 1.0000   |
| Run Time (min):  | 16.03                             | Sample Amount:    | 1.0000   |

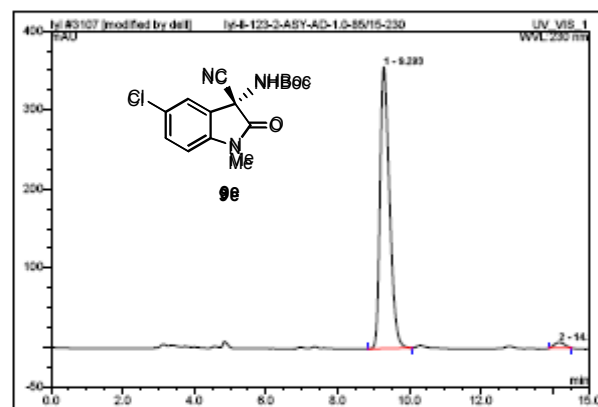

| No.           | RetTime min | Peak Name | Height mAU     | Area mAU/min   | Rel.Area %    | Amount       | Type |
|---------------|-------------|-----------|----------------|----------------|---------------|--------------|------|
| 1             | 9.29        | n.a.      | 365.957        | 109.239        | 97.79         | n.a.         | SMB  |
| 2             | 14.19       | n.a.      | 7.205          | 2.464          | 2.21          | n.a.         | SMB  |
| <b>Total:</b> |             |           | <b>363.196</b> | <b>111.703</b> | <b>100.00</b> | <b>0.000</b> |      |

default/integration

Chromleon (c) Dionex 1996-2005  
 Version 6.80 SR8a Build 2643 (155225)

Operator:deli Timebase:U-3000 Sequence:(j)

Page 1-1  
 2012-8-6 2:33

3109 Iyl-II-123-3-RAC-AD-1.0-85/15-230

|                  |                                   |                   |          |
|------------------|-----------------------------------|-------------------|----------|
| Sample Name:     | Iyl-II-123-3-RAC-AD-1.0-85/15-230 | Injection Volume: | 20.0     |
| Vial Number:     | 898                               | Channel:          | UV_VI8_1 |
| Sample Type:     | standard                          | Wavelength:       | 230      |
| Control Program: | Liu Yunlin                        | Bandwidth:        | n.a.     |
| Quantif. Method: | Iyl                               | Dilution Factor:  | 1.0000   |
| Recording Time:  | 2012-8-8 14:07                    | Sample Weight:    | 1.0000   |
| Run Time (min):  | 21.87                             | Sample Amount:    | 1.0000   |

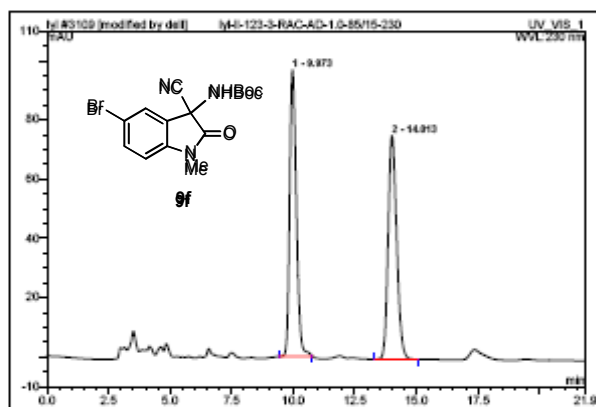

| No.           | RetTime min | Peak Name | Height mAU | Area mAU/min | Rel.Area % | Amount | Type |
|---------------|-------------|-----------|------------|--------------|------------|--------|------|
| 1             | 9.97        | n.a.      | 95.594     | 30.506       | 50.11      | n.a.   | SMB* |
| 2             | 14.01       | n.a.      | 75.405     | 30.373       | 49.89      | n.a.   | SMB  |
| <b>Total:</b> |             |           | 171.999    | 60.878       | 100.00     | 0.000  |      |

default/integration

Chromleon (c) Dionex 1996-2005  
 Version 6.80 SR8a Build 2643 (155225)

Operator:deli Timebase:U-3000 Sequence:(j)

Page 1-1  
 2012-8-6 2:50

3110 Iyl-II-123-3-ASY-AD-1.0-85/15-230

|                  |                                   |                   |          |
|------------------|-----------------------------------|-------------------|----------|
| Sample Name:     | Iyl-II-123-3-ASY-AD-1.0-85/15-230 | Injection Volume: | 20.0     |
| Vial Number:     | 898                               | Channel:          | UV_VI8_1 |
| Sample Type:     | standard                          | Wavelength:       | 230      |
| Control Program: | Liu Yunlin                        | Bandwidth:        | n.a.     |
| Quantif. Method: | Iyl                               | Dilution Factor:  | 1.0000   |
| Recording Time:  | 2012-8-8 14:30                    | Sample Weight:    | 1.0000   |
| Run Time (min):  | 18.11                             | Sample Amount:    | 1.0000   |

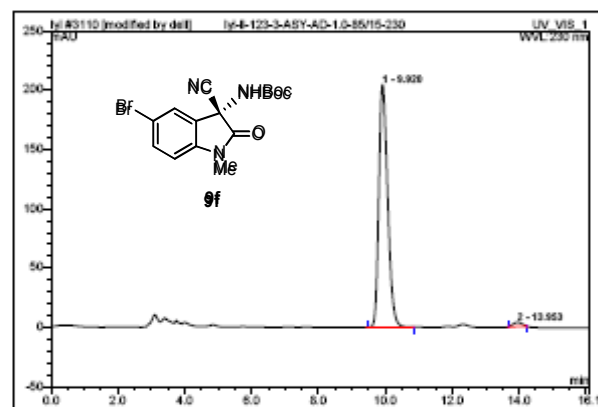

| No.           | RetTime min | Peak Name | Height mAU | Area mAU/min | Rel.Area % | Amount | Type |
|---------------|-------------|-----------|------------|--------------|------------|--------|------|
| 1             | 9.92        | n.a.      | 204.653    | 62.698       | 99.21      | n.a.   | SMB  |
| 2             | 13.95       | n.a.      | 3.656      | 1.140        | 1.79       | n.a.   | SMB* |
| <b>Total:</b> |             |           | 208.308    | 63.828       | 100.00     | 0.000  |      |

default/integration

Chromleon (c) Dionex 1996-2005  
 Version 6.80 SR8a Build 2643 (155225)



Operator:deli Timebase:U-3000 Sequence:yl

Page 1-1  
 2012-8-6 3:14

3111 Iyl-II-123-4-RAC-AD-1.0-85/15-230

|                  |                                   |                   |          |
|------------------|-----------------------------------|-------------------|----------|
| Sample Name:     | Iyl-II-123-4-RAC-AD-1.0-85/15-230 | Injection Volume: | 20.0     |
| Vial Number:     | 898                               | Channel:          | UV_VI8_1 |
| Sample Type:     | standard                          | Wavelength:       | 230      |
| Control Program: | Liu Yunlin                        | Bandwidth:        | n.a.     |
| Quantif. Method: | Iyl                               | Dilution Factor:  | 1.0000   |
| Recording Time:  | 2012-8-8 14:47                    | Sample Weight:    | 1.0000   |
| Run Time (min):  | 22.87                             | Sample Amount:    | 1.0000   |

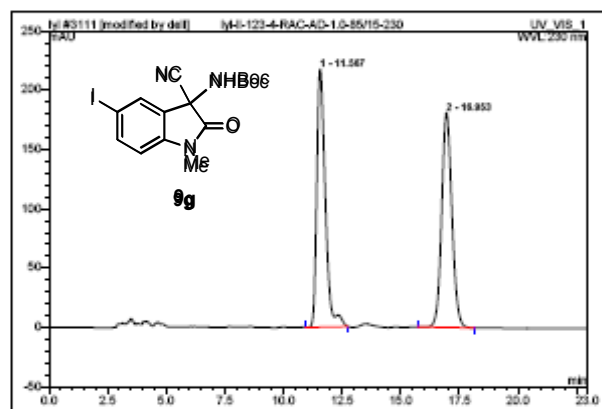

| No.           | RetTime min | Peak Name | Height mAU     | Area mAU/min   | Rel.Area %    | Amount       | Type |
|---------------|-------------|-----------|----------------|----------------|---------------|--------------|------|
| 1             | 11.57       | n.a.      | 217.500        | 91.215         | 48.78         | n.a.         | SMB* |
| 2             | 16.95       | n.a.      | 180.933        | 92.021         | 50.22         | n.a.         | SMB* |
| <b>Total:</b> |             |           | <b>398.432</b> | <b>183.236</b> | <b>100.00</b> | <b>0.000</b> |      |

default/integration

Chromleon (c) Dionex 1996-2005  
 Version 6.80 SR8a Build 2643 (155225)

Operator:deli Timebase:U-3000 Sequence:yl

Page 1-1  
 2012-8-6 3:22

3112 Iyl-II-123-4-ASY-AD-1.0-85/15-230

|                  |                                   |                   |          |
|------------------|-----------------------------------|-------------------|----------|
| Sample Name:     | Iyl-II-123-4-ASY-AD-1.0-85/15-230 | Injection Volume: | 20.0     |
| Vial Number:     | 898                               | Channel:          | UV_VI8_1 |
| Sample Type:     | standard                          | Wavelength:       | 230      |
| Control Program: | Liu Yunlin                        | Bandwidth:        | n.a.     |
| Quantif. Method: | Iyl                               | Dilution Factor:  | 1.0000   |
| Recording Time:  | 2012-8-8 16:12                    | Sample Weight:    | 1.0000   |
| Run Time (min):  | 17.88                             | Sample Amount:    | 1.0000   |

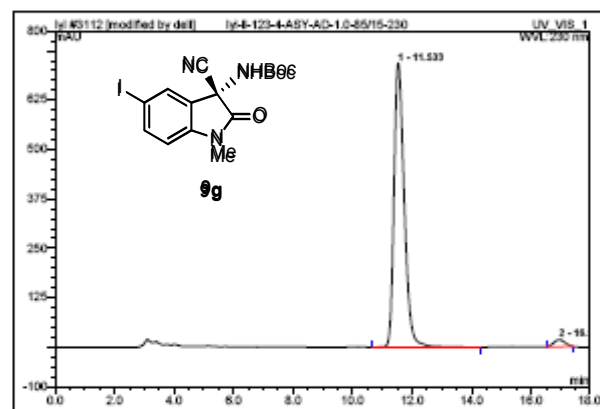

| No.           | RetTime min | Peak Name | Height mAU     | Area mAU/min   | Rel.Area %    | Amount       | Type |
|---------------|-------------|-----------|----------------|----------------|---------------|--------------|------|
| 1             | 11.53       | n.a.      | 718.576        | 295.898        | 97.40         | n.a.         | SMB* |
| 2             | 16.95       | n.a.      | 17.396         | 7.644          | 2.60          | n.a.         | SMB* |
| <b>Total:</b> |             |           | <b>735.972</b> | <b>293.541</b> | <b>100.00</b> | <b>0.000</b> |      |

default/integration

Chromleon (c) Dionex 1996-2005  
 Version 6.80 SR8a Build 2643 (155225)

Operator:deli Timebase:U-3000 Sequence:yl

Page 1-1  
 2012-9-6 6:27

3214 Iyl-II-147-RAC-AD-1.0-85/15-230

|                  |                                 |                   |          |
|------------------|---------------------------------|-------------------|----------|
| Sample Name:     | Iyl-II-147-RAC-AD-1.0-85/15-230 | Injection Volume: | 20.0     |
| Vial Number:     | 898                             | Channel:          | UV_VI8_1 |
| Sample Type:     | standard                        | Wavelength:       | 230      |
| Control Program: | Liu Yunlin                      | Bandwidth:        | n.a.     |
| Quantif. Method: | Iyl                             | Dilution Factor:  | 1.0000   |
| Recording Time:  | 2012-8-18 18:31                 | Sample Weight:    | 1.0000   |
| Run Time (min):  | 28.48                           | Sample Amount:    | 1.0000   |

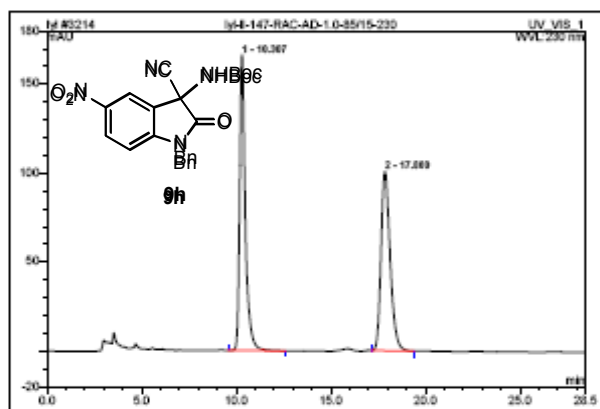

| No.    | Ret.Time min | Peak Name | Height mAU | Area mAU/min | Rel.Area % | Amount | Type |
|--------|--------------|-----------|------------|--------------|------------|--------|------|
| 1      | 10.31        | n.a.      | 165.209    | 58.215       | 50.83      | n.a.   | SMB  |
| 2      | 17.86        | n.a.      | 100.550    | 55.324       | 49.17      | n.a.   | SMB  |
| Total: |              |           | 265.760    | 114.543      | 100.00     | 0.000  |      |

default/integration

Chromleon (c) Dionex 1996-2005  
 Version 6.80 SR8a Build 2643 (155225)

Operator:deli Timebase:U-3000 Sequence:yl

Page 1-1  
 2012-9-6 6:28

3215 Iyl-II-147-asy-AD-1.0-85/15-230

|                  |                                 |                   |          |
|------------------|---------------------------------|-------------------|----------|
| Sample Name:     | Iyl-II-147-asy-AD-1.0-85/15-230 | Injection Volume: | 20.0     |
| Vial Number:     | 898                             | Channel:          | UV_VI8_1 |
| Sample Type:     | standard                        | Wavelength:       | 230      |
| Control Program: | Liu Yunlin                      | Bandwidth:        | n.a.     |
| Quantif. Method: | Iyl                             | Dilution Factor:  | 1.0000   |
| Recording Time:  | 2012-8-18 17:01                 | Sample Weight:    | 1.0000   |
| Run Time (min):  | 19.68                           | Sample Amount:    | 1.0000   |

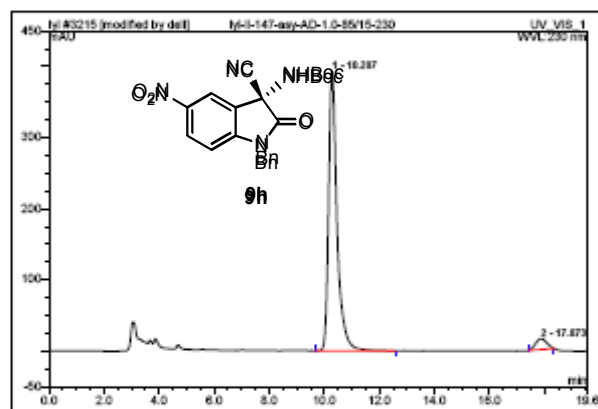

| No.    | Ret.Time min | Peak Name | Height mAU | Area mAU/min | Rel.Area % | Amount | Type |
|--------|--------------|-----------|------------|--------------|------------|--------|------|
| 1      | 10.25        | n.a.      | 392.833    | 139.469      | 95.10      | n.a.   | SMB  |
| 2      | 17.87        | n.a.      | 15.301     | 7.180        | 4.90       | n.a.   | SMB  |
| Total: |              |           | 408.134    | 146.649      | 100.00     | 0.000  |      |

default/integration

Chromleon (c) Dionex 1996-2005  
 Version 6.80 SR8a Build 2643 (155225)

Operator:deli Timebase:U-3000 Sequence:yl

Page 1-1  
 2012-9-7 10:59

3320 Iyl-II-125-2-rac-AD-1.0-85/15-230

|                  |                                   |                   |          |
|------------------|-----------------------------------|-------------------|----------|
| Sample Name:     | Iyl-II-125-2-rac-AD-1.0-85/15-230 | Injection Volume: | 20.0     |
| Vial Number:     | 898                               | Channel:          | UV_VI8_1 |
| Sample Type:     | standard                          | Wavelength:       | 230      |
| Control Program: | Liu Yunlin                        | Bandwidth:        | n.a.     |
| Quantif. Method: | Iyl                               | Dilution Factor:  | 1.0000   |
| Recording Time:  | 2012-8-7 10:37                    | Sample Weight:    | 1.0000   |
| Run Time (min):  | 17.82                             | Sample Amount:    | 1.0000   |

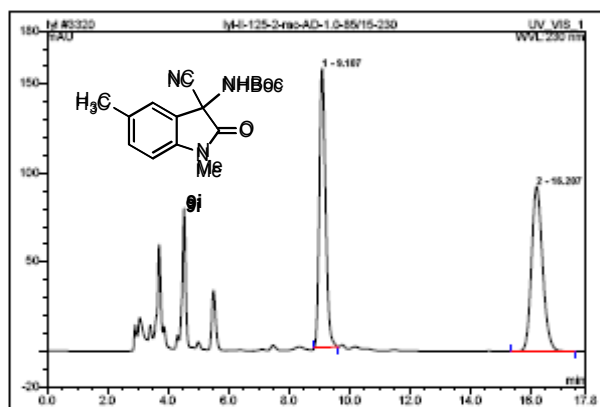

| No.           | Ret.Time min | Peak Name | Height mAU     | Area mAU/min  | Rel.Area %    | Amount       | Type |
|---------------|--------------|-----------|----------------|---------------|---------------|--------------|------|
| 1             | 9.11         | n.a.      | 155.696        | 37.508        | 48.73         | n.a.         | SMB  |
| 2             | 16.21        | n.a.      | 92.666         | 39.459        | 51.27         | n.a.         | SMB  |
| <b>Total:</b> |              |           | <b>248.362</b> | <b>76.966</b> | <b>100.00</b> | <b>0.000</b> |      |

default/integration

Chromleon (c) Dionex 1996-2005  
 Version 6.80 SR8a Build 2643 (158225)

Operator:deli Timebase:U-3000 Sequence:yl

Page 1-1  
 2012-9-7 10:59

3319 Iyl-II-125-2-asy-AD-1.0-85/15-230

|                  |                                   |                   |          |
|------------------|-----------------------------------|-------------------|----------|
| Sample Name:     | Iyl-II-125-2-asy-AD-1.0-85/15-230 | Injection Volume: | 20.0     |
| Vial Number:     | 898                               | Channel:          | UV_VI8_1 |
| Sample Type:     | standard                          | Wavelength:       | 230      |
| Control Program: | Liu Yunlin                        | Bandwidth:        | n.a.     |
| Quantif. Method: | Iyl                               | Dilution Factor:  | 1.0000   |
| Recording Time:  | 2012-8-7 10:19                    | Sample Weight:    | 1.0000   |
| Run Time (min):  | 17.32                             | Sample Amount:    | 1.0000   |

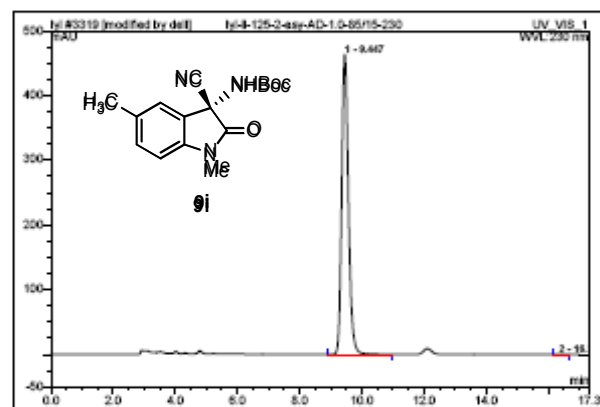

| No.           | Ret.Time min | Peak Name | Height mAU     | Area mAU/min   | Rel.Area %    | Amount       | Type |
|---------------|--------------|-----------|----------------|----------------|---------------|--------------|------|
| 1             | 9.45         | n.a.      | 463.796        | 116.241        | 99.99         | n.a.         | SMB  |
| 2             | 16.34        | n.a.      | 0.026          | 0.007          | 0.01          | n.a.         | SMB* |
| <b>Total:</b> |              |           | <b>463.822</b> | <b>116.248</b> | <b>100.00</b> | <b>0.000</b> |      |

default/integration

Chromleon (c) Dionex 1996-2005  
 Version 6.80 SR8a Build 2643 (158225)

Operator: dell Timebase: U-3000 Sequence: (j)

Page 1-1  
 2012-8-11 3:47

3151 Iyl-II-125-3-rac-AD-1.0-85/15-230

|                  |                                   |                   |          |
|------------------|-----------------------------------|-------------------|----------|
| Sample Name:     | Iyl-II-125-3-rac-AD-1.0-85/15-230 | Injection Volume: | 20.0     |
| Vial Number:     | 898                               | Channel:          | UV_VI8_1 |
| Sample Type:     | standard                          | Wavelength:       | 230      |
| Control Program: | Liu Yunlin                        | Bandwidth:        | n.a.     |
| Quantif. Method: | Iyl                               | Dilution Factor:  | 1.0000   |
| Recording Time:  | 2012-8-11 15:30                   | Sample Weight:    | 1.0000   |
| Run Time (min):  | 12.67                             | Sample Amount:    | 1.0000   |

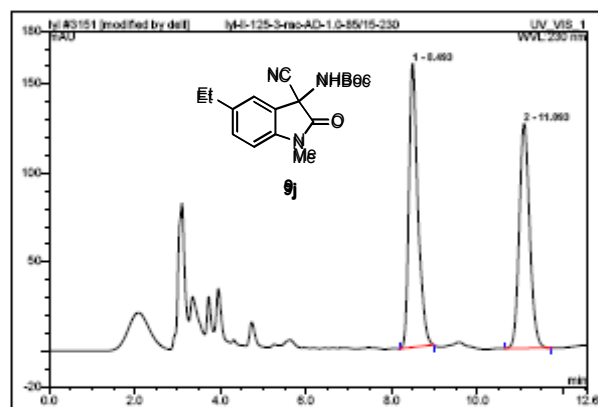

| No.           | Ret.Time min | Peak Name | Height mAU | Area mAU*min | Rel.Area % | Amount | Type |
|---------------|--------------|-----------|------------|--------------|------------|--------|------|
| 1             | 8.46         | n.a.      | 159.519    | 38.748       | 52.08      | n.a.   | BMB* |
| 2             | 11.05        | n.a.      | 125.357    | 35.648       | 47.92      | n.a.   | BMB* |
| <b>Total:</b> |              |           | 285.876    | 74.396       | 100.00     | 0.000  |      |

default/integration

Chromleon (c) Dionex 1996-2005  
 Version 6.80 SR8a Build 2643 (155225)

Operator: dell Timebase: U-3000 Sequence: (j)

Page 1-1  
 2012-8-11 3:47

3149 Iyl-II-125-3-asy-AD-1.0-85/15-230

|                  |                                   |                   |          |
|------------------|-----------------------------------|-------------------|----------|
| Sample Name:     | Iyl-II-125-3-asy-AD-1.0-85/15-230 | Injection Volume: | 20.0     |
| Vial Number:     | 898                               | Channel:          | UV_VI8_1 |
| Sample Type:     | standard                          | Wavelength:       | 230      |
| Control Program: | Liu Yunlin                        | Bandwidth:        | n.a.     |
| Quantif. Method: | Iyl                               | Dilution Factor:  | 1.0000   |
| Recording Time:  | 2012-8-11 14:47                   | Sample Weight:    | 1.0000   |
| Run Time (min):  | 16.73                             | Sample Amount:    | 1.0000   |

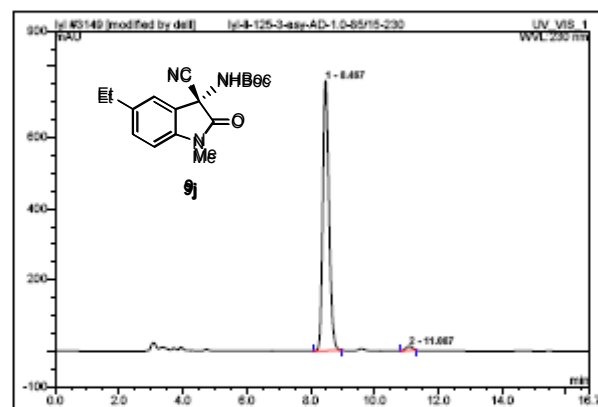

| No.           | Ret.Time min | Peak Name | Height mAU | Area mAU*min | Rel.Area % | Amount | Type |
|---------------|--------------|-----------|------------|--------------|------------|--------|------|
| 1             | 8.47         | n.a.      | 759.154    | 170.917      | 98.49      | n.a.   | BMB* |
| 2             | 11.05        | n.a.      | 11.487     | 2.626        | 1.51       | n.a.   | BMB* |
| <b>Total:</b> |              |           | 770.651    | 173.444      | 100.00     | 0.000  |      |

default/integration

Chromleon (c) Dionex 1996-2005  
 Version 6.80 SR8a Build 2643 (155225)

Operator:deli Timebase:U-3000 Sequence:yl

Page 1-1  
 2012-8-12 1:03

3174 Iyl-II-125-4-RAC-AS-1.0-85/15-230

|                  |                                   |                   |          |
|------------------|-----------------------------------|-------------------|----------|
| Sample Name:     | Iyl-II-125-4-RAC-AS-1.0-85/15-230 | Injection Volume: | 20.0     |
| Vial Number:     | 898                               | Channel:          | UV_VI8_1 |
| Sample Type:     | standard                          | Wavelength:       | 230      |
| Control Program: | Liu Yunlin                        | Bandwidth:        | n.a.     |
| Quantif. Method: | Iyl                               | Dilution Factor:  | 1.0000   |
| Recording Time:  | 2012-8-12 11:48                   | Sample Weight:    | 1.0000   |
| Run Time (min):  | 36.33                             | Sample Amount:    | 1.0000   |

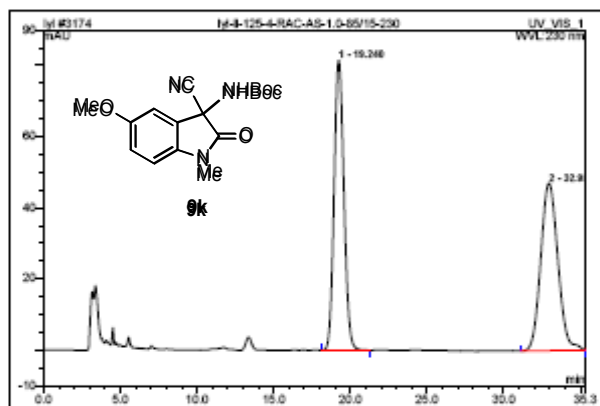

| No.    | RetTime min | Peak Name | Height mAU | Area mAU/min | Rel.Area % | Amount | Type |
|--------|-------------|-----------|------------|--------------|------------|--------|------|
| 1      | 15.24       | n.a.      | 81.495     | 60.590       | 48.86      | n.a.   | BMB  |
| 2      | 32.95       | n.a.      | 47.070     | 60.935       | 50.14      | n.a.   | BMB  |
| Total: |             |           | 128.565    | 121.525      | 100.00     | 0.000  |      |

default/integration

Chromleon (c) Dionex 1996-2005  
 Version 6.80 SR8a Build 2643 (155225)

Operator:deli Timebase:U-3000 Sequence:yl

Page 1-1  
 2012-8-12 1:02

3175 Iyl-II-125-4-asy-AS-1.0-85/15-230

|                  |                                   |                   |          |
|------------------|-----------------------------------|-------------------|----------|
| Sample Name:     | Iyl-II-125-4-asy-AS-1.0-85/15-230 | Injection Volume: | 20.0     |
| Vial Number:     | 898                               | Channel:          | UV_VI8_1 |
| Sample Type:     | standard                          | Wavelength:       | 230      |
| Control Program: | Liu Yunlin                        | Bandwidth:        | n.a.     |
| Quantif. Method: | Iyl                               | Dilution Factor:  | 1.0000   |
| Recording Time:  | 2012-8-12 12:22                   | Sample Weight:    | 1.0000   |
| Run Time (min):  | 33.80                             | Sample Amount:    | 1.0000   |

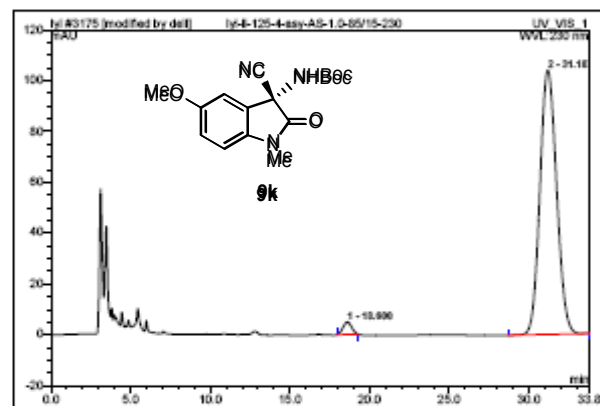

| No.    | RetTime min | Peak Name | Height mAU | Area mAU/min | Rel.Area % | Amount | Type |
|--------|-------------|-----------|------------|--------------|------------|--------|------|
| 1      | 18.60       | n.a.      | 4.885      | 3.074        | 2.38       | n.a.   | BMB* |
| 2      | 31.18       | n.a.      | 103.993    | 125.849      | 97.62      | n.a.   | BMB* |
| Total: |             |           | 108.868    | 128.923      | 100.00     | 0.000  |      |

default/integration

Chromleon (c) Dionex 1996-2005  
 Version 6.80 SR8a Build 2643 (155225)

Operator: dell Timebase: U-3000 Sequence: (j)

Page 1-1  
 2012-9-6 6:26

3196 Iyl-II-139-1-RAC-AD-1.0-85/15-230

Sample Name: Iyl-II-139-1-RAC-AD-1.0-85/15-230 Injection Volume: 20.0  
 Vial Number: 898 Channel: UV\_VI8\_1  
 Sample Type: standard Wavelength: 230  
 Control Program: Liu Yunlin Bandwidth: n.a.  
 Quantif. Method: Iyl Dilution Factor: 1.0000  
 Recording Time: 2012-8-16 16:38 Sample Weight: 1.0000  
 Run Time (min): 23.64 Sample Amount: 1.0000

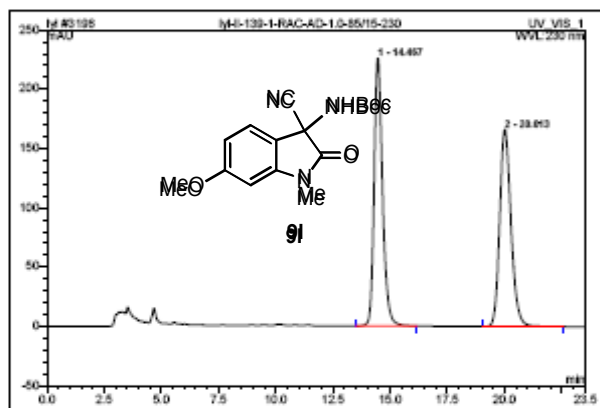

| No.    | RetTime min | Peak Name | Height mAU | Area mAU*min | Rel.Area % | Amount | Type |
|--------|-------------|-----------|------------|--------------|------------|--------|------|
| 1      | 14.47       | n.a       | 225.793    | 95.420       | 50.20      | n.a.   | SMB  |
| 2      | 20.01       | n.a       | 165.355    | 95.658       | 49.80      | n.a.   | SMB  |
| Total: |             |           | 392.152    | 192.078      | 100.00     | 0.000  |      |

default/integration

Chromleon (c) Dionex 1996-2005  
 Version 6.80 SR8a Build 2643 (155225)

Operator: dell Timebase: U-3000 Sequence: (j)

Page 1-1  
 2012-9-6 6:26

3195 Iyl-II-139-1-ASY-AD-1.0-85/15-230

Sample Name: Iyl-II-139-1-ASY-AD-1.0-85/15-230 Injection Volume: 20.0  
 Vial Number: 898 Channel: UV\_VI8\_1  
 Sample Type: standard Wavelength: 230  
 Control Program: Liu Yunlin Bandwidth: n.a.  
 Quantif. Method: Iyl Dilution Factor: 1.0000  
 Recording Time: 2012-8-16 16:16 Sample Weight: 1.0000  
 Run Time (min): 22.23 Sample Amount: 1.0000

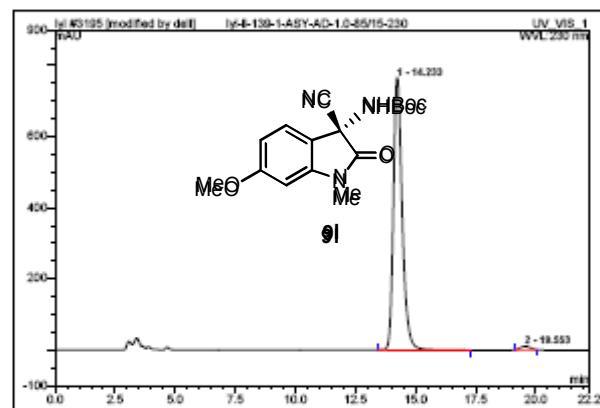

| No.    | RetTime min | Peak Name | Height mAU | Area mAU*min | Rel.Area % | Amount | Type |
|--------|-------------|-----------|------------|--------------|------------|--------|------|
| 1      | 14.23       | n.a       | 766.297    | 325.566      | 99.68      | n.a.   | SMB  |
| 2      | 15.55       | n.a       | 9.513      | 4.338        | 1.32       | n.a.   | SMB  |
| Total: |             |           | 775.810    | 329.904      | 100.00     | 0.000  |      |

default/integration

Chromleon (c) Dionex 1996-2005  
 Version 6.80 SR8a Build 2643 (155225)

Operator:deli Timebase:U-3000 Sequence:(j)

Page 1-1  
 2012-8-11 9:23

3168 Iyl-II-124-1-RAC-AS-1.0-85/15-230

|                  |                                   |                   |          |
|------------------|-----------------------------------|-------------------|----------|
| Sample Name:     | Iyl-II-124-1-RAC-AS-1.0-85/15-230 | Injection Volume: | 20.0     |
| Vial Number:     | 898                               | Channel:          | UV_VI8_1 |
| Sample Type:     | standard                          | Wavelength:       | 230      |
| Control Program: | Liu Yunlin                        | Bandwidth:        | n.a.     |
| Quantif. Method: | Iyl                               | Dilution Factor:  | 1.0000   |
| Recording Time:  | 2012-8-11 20:24                   | Sample Weight:    | 1.0000   |
| Run Time (min):  | 28.88                             | Sample Amount:    | 1.0000   |

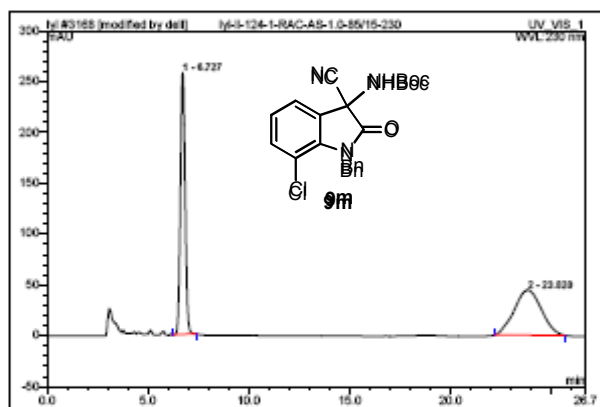

| No.           | RetTime min | Peak Name | Height mAU | Area mAU*min | Rel.Area % | Amount | Type |
|---------------|-------------|-----------|------------|--------------|------------|--------|------|
| 1             | 6.73        | n.a.      | 257.404    | 69.725       | 50.27      | n.a.   | SMB* |
| 2             | 23.82       | n.a.      | 44.178     | 69.990       | 49.73      | n.a.   | SMB* |
| <b>Total:</b> |             |           | 301.582    | 138.715      | 100.00     | 0.000  |      |

default/integration

Chromleon (c) Dionex 1996-2005  
 Version 6.80 SR8a Build 2643 (155225)

Operator:deli Timebase:U-3000 Sequence:(j)

Page 1-1  
 2012-8-11 9:23

3169 Iyl-II-124-1-ASY-AS-1.0-85/15-230

|                  |                                   |                   |          |
|------------------|-----------------------------------|-------------------|----------|
| Sample Name:     | Iyl-II-124-1-ASY-AS-1.0-85/15-230 | Injection Volume: | 20.0     |
| Vial Number:     | 898                               | Channel:          | UV_VI8_1 |
| Sample Type:     | standard                          | Wavelength:       | 230      |
| Control Program: | Liu Yunlin                        | Bandwidth:        | n.a.     |
| Quantif. Method: | Iyl                               | Dilution Factor:  | 1.0000   |
| Recording Time:  | 2012-8-11 20:23                   | Sample Weight:    | 1.0000   |
| Run Time (min):  | 28.93                             | Sample Amount:    | 1.0000   |

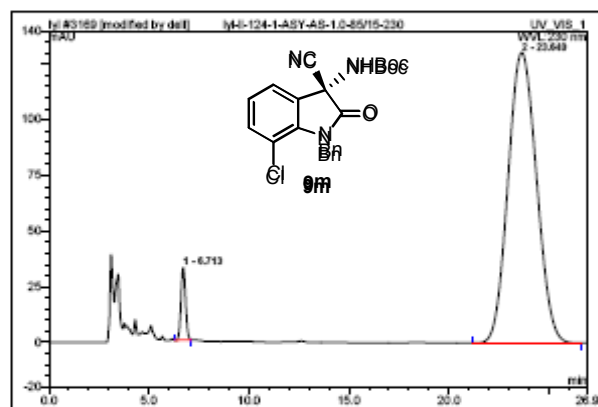

| No.           | RetTime min | Peak Name | Height mAU | Area mAU*min | Rel.Area % | Amount | Type |
|---------------|-------------|-----------|------------|--------------|------------|--------|------|
| 1             | 6.71        | n.a.      | 32.541     | 8.567        | 3.83       | n.a.   | SMB* |
| 2             | 23.64       | n.a.      | 130.700    | 215.588      | 95.17      | n.a.   | SMB  |
| <b>Total:</b> |             |           | 163.241    | 224.175      | 100.00     | 0.000  |      |

default/integration

Chromleon (c) Dionex 1996-2005  
 Version 6.80 SR8a Build 2643 (155225)

Operator:deli Timebase:U-3000 Sequence:yl

Page 1-1  
 2012-8-12 2:00

3178 Iyl-II-124-3-RAC-OD-1.0-85/15-230

|                  |                                   |                   |          |
|------------------|-----------------------------------|-------------------|----------|
| Sample Name:     | Iyl-II-124-3-RAC-OD-1.0-85/15-230 | Injection Volume: | 20.0     |
| Vial Number:     | 898                               | Channel:          | UV_VI8_1 |
| Sample Type:     | standard                          | Wavelength:       | 280      |
| Control Program: | Liu Yunlin                        | Bandwidth:        | n.a.     |
| Quantif. Method: | Iyl                               | Dilution Factor:  | 1.0000   |
| Recording Time:  | 2012-8-12 13:50                   | Sample Weight:    | 1.0000   |
| Run Time (min):  | 8.81                              | Sample Amount:    | 1.0000   |

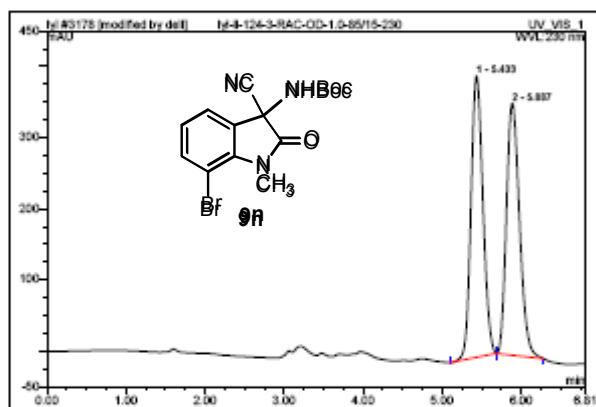

| No.           | RetTime min | Peak Name | Height mAU | Area mAU/min | Rel.Area % | Amount | Type |
|---------------|-------------|-----------|------------|--------------|------------|--------|------|
| 1             | 5.43        | n.a.      | 395.452    | 68.863       | 50.42      | n.a.   | SMB* |
| 2             | 5.88        | n.a.      | 354.285    | 67.736       | 49.58      | n.a.   | SMB* |
| <b>Total:</b> |             |           | 749.737    | 136.619      | 100.00     | 0.000  |      |

default/integration

Chromleon (c) Dionex 1996-2005  
 Version 6.80 SR8a Build 2643 (155225)

Operator:deli Timebase:U-3000 Sequence:yl

Page 1-1  
 2012-8-12 2:01

3162 Iyl-II-124-3-ASY-OD-1.0-85/15-230

|                  |                                   |                   |          |
|------------------|-----------------------------------|-------------------|----------|
| Sample Name:     | Iyl-II-124-3-ASY-OD-1.0-85/15-230 | Injection Volume: | 20.0     |
| Vial Number:     | 898                               | Channel:          | UV_VI8_1 |
| Sample Type:     | standard                          | Wavelength:       | 280      |
| Control Program: | Liu Yunlin                        | Bandwidth:        | n.a.     |
| Quantif. Method: | Iyl                               | Dilution Factor:  | 1.0000   |
| Recording Time:  | 2012-8-11 18:44                   | Sample Weight:    | 1.0000   |
| Run Time (min):  | 8.29                              | Sample Amount:    | 1.0000   |

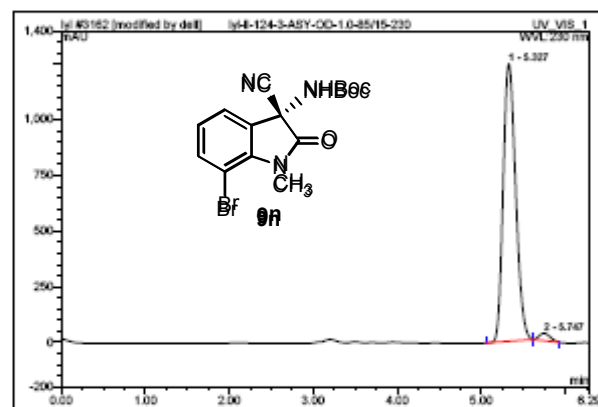

| No.           | RetTime min | Peak Name | Height mAU | Area mAU/min | Rel.Area % | Amount | Type |
|---------------|-------------|-----------|------------|--------------|------------|--------|------|
| 1             | 5.33        | n.a.      | 1247.536   | 214.315      | 97.75      | n.a.   | SMB* |
| 2             | 5.75        | n.a.      | 33.178     | 4.939        | 2.25       | n.a.   | SMB* |
| <b>Total:</b> |             |           | 1280.714   | 219.254      | 100.00     | 0.000  |      |

default/integration

Chromleon (c) Dionex 1996-2005  
 Version 6.80 SR8a Build 2643 (155225)



Operator:deli Timebase:U-3000 Sequence:yl

Page 1-1  
 2012-8-11 2:31

3146 Iyl-II-123-5-rac-AD-1.0-85/15-230

|                  |                                   |                   |          |
|------------------|-----------------------------------|-------------------|----------|
| Sample Name:     | Iyl-II-123-5-rac-AD-1.0-85/15-230 | Injection Volume: | 20.0     |
| Vial Number:     | 898                               | Channel:          | UV_VI8_1 |
| Sample Type:     | standard                          | Wavelength:       | 230      |
| Control Program: | Liu Yunlin                        | Bandwidth:        | n.a.     |
| Quantif. Method: | Iyl                               | Dilution Factor:  | 1.0000   |
| Recording Time:  | 2012-8-11 14:11                   | Sample Weight:    | 1.0000   |
| Run Time (min):  | 8.78                              | Sample Amount:    | 1.0000   |

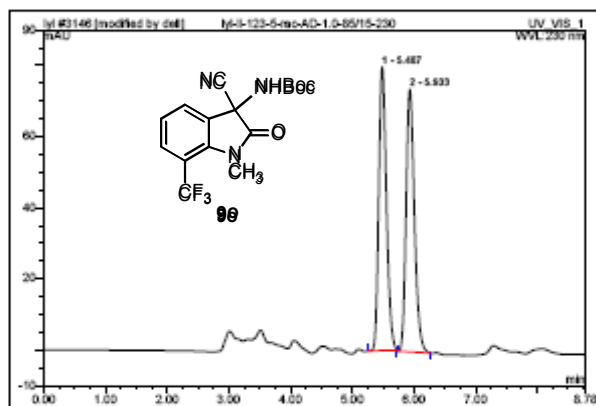

| No.    | RetTime min | Peak Name | Height mAU | Area mAU/min | Rel.Area % | Amount | Type |
|--------|-------------|-----------|------------|--------------|------------|--------|------|
| 1      | 5.48        | n.a.      | 73.746     | 11.431       | 49.50      | n.a.   | SMB* |
| 2      | 5.93        | n.a.      | 73.795     | 11.478       | 50.10      | n.a.   | SMB* |
| Total: |             |           | 153.542    | 22.909       | 100.00     | 0.000  |      |

default/integration

Chromleon (c) Dionex 1996-2005  
 Version 6.80 SR8a Build 2643 (155225)

Operator:deli Timebase:U-3000 Sequence:yl

Page 1-1  
 2012-8-11 2:32

3147 Iyl-II-123-5-asy-AD-1.0-85/15-230

|                  |                                   |                   |          |
|------------------|-----------------------------------|-------------------|----------|
| Sample Name:     | Iyl-II-123-5-asy-AD-1.0-85/15-230 | Injection Volume: | 20.0     |
| Vial Number:     | 898                               | Channel:          | UV_VI8_1 |
| Sample Type:     | standard                          | Wavelength:       | 230      |
| Control Program: | Liu Yunlin                        | Bandwidth:        | n.a.     |
| Quantif. Method: | Iyl                               | Dilution Factor:  | 1.0000   |
| Recording Time:  | 2012-8-11 14:21                   | Sample Weight:    | 1.0000   |
| Run Time (min):  | 8.37                              | Sample Amount:    | 1.0000   |

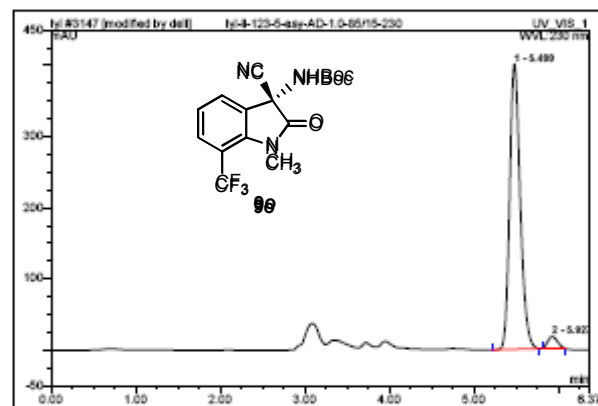

| No.    | RetTime min | Peak Name | Height mAU | Area mAU/min | Rel.Area % | Amount | Type |
|--------|-------------|-----------|------------|--------------|------------|--------|------|
| 1      | 5.48        | n.a.      | 400.943    | 57.795       | 96.31      | n.a.   | SMB* |
| 2      | 5.93        | n.a.      | 16.553     | 2.217        | 3.69       | n.a.   | SMB* |
| Total: |             |           | 417.507    | 60.011       | 100.00     | 0.000  |      |

default/integration

Chromleon (c) Dionex 1996-2005  
 Version 6.80 SR8a Build 2643 (155225)

Operator:deli Timebase:U-3000 Sequence:yl

Page 1-1  
 2012-9-6 6:24

3145 Iyl-II-125-6-rac-AD-1.0-85/15-230

|                  |                                   |                   |          |
|------------------|-----------------------------------|-------------------|----------|
| Sample Name:     | Iyl-II-125-6-rac-AD-1.0-85/15-230 | Injection Volume: | 20.0     |
| Vial Number:     | 898                               | Channel:          | UV_VI8_1 |
| Sample Type:     | standard                          | Wavelength:       | 230      |
| Control Program: | Liu Yunlin                        | Bandwidth:        | n.a.     |
| Quantif. Method: | Iyl                               | Dilution Factor:  | 1.0000   |
| Recording Time:  | 2012-8-11 12:00                   | Sample Weight:    | 1.0000   |
| Run Time (min):  | 16.18                             | Sample Amount:    | 1.0000   |

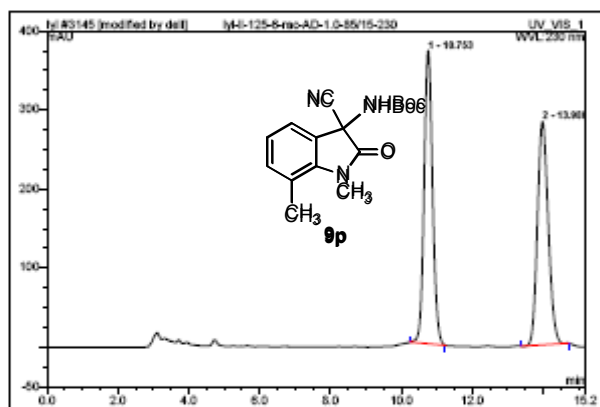

| No.    | RetTime min | Peak Name | Height mAU | Area mAU*min | Rel.Area % | Amount | Type |
|--------|-------------|-----------|------------|--------------|------------|--------|------|
| 1      | 10.75       | n.a.      | 370.980    | 102.222      | 50.62      | n.a.   | SMB* |
| 2      | 13.98       | n.a.      | 292.103    | 99.715       | 49.38      | n.a.   | SMB* |
| Total: |             |           | 663.082    | 201.942      | 100.00     | 0.000  |      |

default/integration

Chromleon (c) Dionex 1996-2005  
 Version 6.80 SR8a Build 2643 (155225)

Operator:deli Timebase:U-3000 Sequence:yl

Page 1-1  
 2012-9-6 6:24

3144 Iyl-II-125-6-asy-AD-1.0-85/15-230

|                  |                                   |                   |          |
|------------------|-----------------------------------|-------------------|----------|
| Sample Name:     | Iyl-II-125-6-asy-AD-1.0-85/15-230 | Injection Volume: | 20.0     |
| Vial Number:     | 898                               | Channel:          | UV_VI8_1 |
| Sample Type:     | standard                          | Wavelength:       | 230      |
| Control Program: | Liu Yunlin                        | Bandwidth:        | n.a.     |
| Quantif. Method: | Iyl                               | Dilution Factor:  | 1.0000   |
| Recording Time:  | 2012-8-11 11:43                   | Sample Weight:    | 1.0000   |
| Run Time (min):  | 16.08                             | Sample Amount:    | 1.0000   |

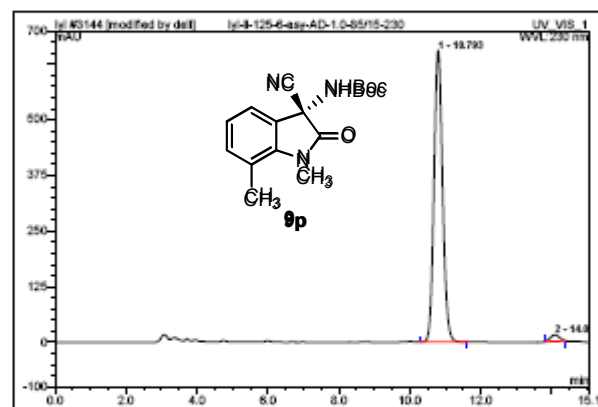

| No.    | RetTime min | Peak Name | Height mAU | Area mAU*min | Rel.Area % | Amount | Type |
|--------|-------------|-----------|------------|--------------|------------|--------|------|
| 1      | 10.75       | n.a.      | 656.049    | 184.059      | 97.72      | n.a.   | SMB  |
| 2      | 14.09       | n.a.      | 14.186     | 4.291        | 2.28       | n.a.   | SMB* |
| Total: |             |           | 670.234    | 188.350      | 100.00     | 0.000  |      |

default/integration

Chromleon (c) Dionex 1996-2005  
 Version 6.80 SR8a Build 2643 (155225)

Operator:deli Timebase:U-3000 Sequence:(j)

Page 1-1  
 2012-9-4 9:54

3240 Iyl-IL-148-2-RAC-OD-1.0-85/15-230

|                  |                                   |                   |          |
|------------------|-----------------------------------|-------------------|----------|
| Sample Name:     | Iyl-IL-148-2-RAC-OD-1.0-85/15-230 | Injection Volume: | 20.0     |
| Vial Number:     | 898                               | Channel:          | UV_VIS_1 |
| Sample Type:     | standard                          | Wavelength:       | 230      |
| Control Program: | Liu Yunlin                        | Bandwidth:        | n.a.     |
| Quantif. Method: | Iyl                               | Dilution Factor:  | 1.0000   |
| Recording Time:  | 2012-8-22 18:48                   | Sample Weight:    | 1.0000   |
| Run Time (min):  | 8.88                              | Sample Amount:    | 1.0000   |

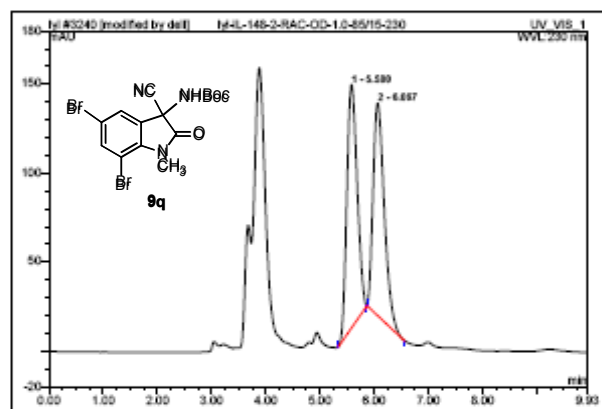

| No.    | Ret.Time min | Peak Name | Height mAU | Area mAU*min | Rel.Area % | Amount | Type |
|--------|--------------|-----------|------------|--------------|------------|--------|------|
| 1      | 5.58         | n.a.      | 135.787    | 30.041       | 51.31      | n.a.   | SMB* |
| 2      | 6.07         | n.a.      | 119.457    | 28.504       | 48.69      | n.a.   | SMB* |
| Total: |              |           | 255.254    | 58.544       | 100.00     | 0.000  |      |

default/integration

Chromleon (c) Dionex 1996-2005  
 Version 6.80 SR8a Build 2643 (155225)

Operator:deli Timebase:U-3000 Sequence:(j)

Page 1-1  
 2012-9-4 9:52

3239 Iyl-IL-148-2-ASY-OD-1.0-85/15-230

|                  |                                   |                   |          |
|------------------|-----------------------------------|-------------------|----------|
| Sample Name:     | Iyl-IL-148-2-ASY-OD-1.0-85/15-230 | Injection Volume: | 20.0     |
| Vial Number:     | 898                               | Channel:          | UV_VIS_1 |
| Sample Type:     | standard                          | Wavelength:       | 230      |
| Control Program: | Liu Yunlin                        | Bandwidth:        | n.a.     |
| Quantif. Method: | Iyl                               | Dilution Factor:  | 1.0000   |
| Recording Time:  | 2012-8-22 18:48                   | Sample Weight:    | 1.0000   |
| Run Time (min):  | 8.88                              | Sample Amount:    | 1.0000   |

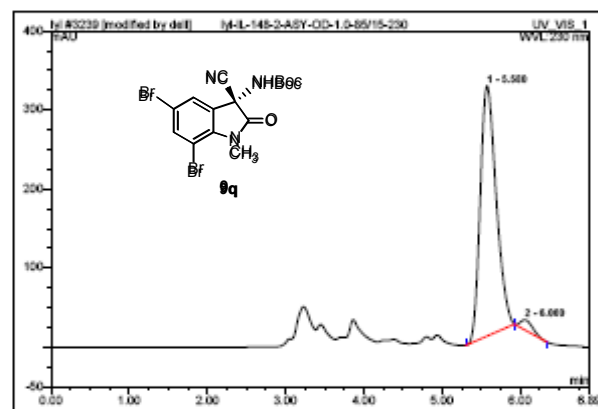

| No.    | Ret.Time min | Peak Name | Height mAU | Area mAU*min | Rel.Area % | Amount | Type |
|--------|--------------|-----------|------------|--------------|------------|--------|------|
| 1      | 5.58         | n.a.      | 316.409    | 74.855       | 96.96      | n.a.   | SMB* |
| 2      | 6.08         | n.a.      | 12.685     | 2.346        | 3.04       | n.a.   | SMB* |
| Total: |              |           | 329.094    | 77.200       | 100.00     | 0.000  |      |

default/integration

Chromleon (c) Dionex 1996-2005  
 Version 6.80 SR8a Build 2643 (155225)

Operator: dell Timebase: U-3000 Sequence: lyl

Page 1-1  
 2012-8-12 1:52

3176 lyl-II-125-7-rac-OZ-1.0-85/15-230

|                  |                                   |                   |          |
|------------------|-----------------------------------|-------------------|----------|
| Sample Name:     | lyl-II-126-7-rac-OZ-1.0-85/15-230 | Injection Volume: | 20.0     |
| Vial Number:     | 888                               | Channel:          | UV_V18_1 |
| Sample Type:     | standard                          | Wavelength:       | 280      |
| Control Program: | Liu Yunlin                        | Bandwidth:        | n.a.     |
| Quantif. Method: | lyl                               | Dilution Factor:  | 1.0000   |
| Recording Time:  | 2012-8-12 13:01                   | Sample Weight:    | 1.0000   |
| Run Time (min):  | 29.08                             | Sample Amount:    | 1.0000   |

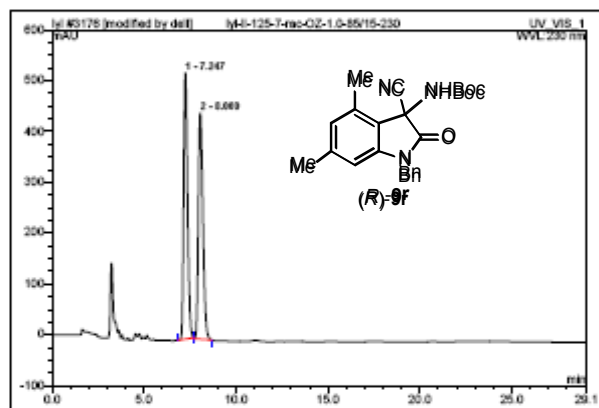

| No.    | Ret.Time min | Peak Name | Height mAU | Area mAU*min | Rel.Area % | Amount | Type |
|--------|--------------|-----------|------------|--------------|------------|--------|------|
| 1      | 7.25         | n.a.      | 523.837    | 126.909      | 48.78      | n.a.   | BME* |
| 2      | 8.05         | n.a.      | 444.821    | 128.039      | 50.22      | n.a.   | BME* |
| Total: |              |           | 968.658    | 254.947      | 100.00     | 0.000  |      |

default/integration

Chromleon (c) Dionex 1996-2005  
 Version 6.80 SR8a Build 2643 (158225)

Operator: dell Timebase: U-3000 Sequence: lyl

Page 1-1  
 2012-8-12 1:52

3177 lyl-II-125-7-ASY-OZ-1.0-85/15-230

|                  |                                   |                   |          |
|------------------|-----------------------------------|-------------------|----------|
| Sample Name:     | lyl-II-126-7-ASY-OZ-1.0-86/16-230 | Injection Volume: | 20.0     |
| Vial Number:     | 888                               | Channel:          | UV_V18_1 |
| Sample Type:     | standard                          | Wavelength:       | 280      |
| Control Program: | Liu Yunlin                        | Bandwidth:        | n.a.     |
| Quantif. Method: | lyl                               | Dilution Factor:  | 1.0000   |
| Recording Time:  | 2012-8-12 13:31                   | Sample Weight:    | 1.0000   |
| Run Time (min):  | 11.74                             | Sample Amount:    | 1.0000   |

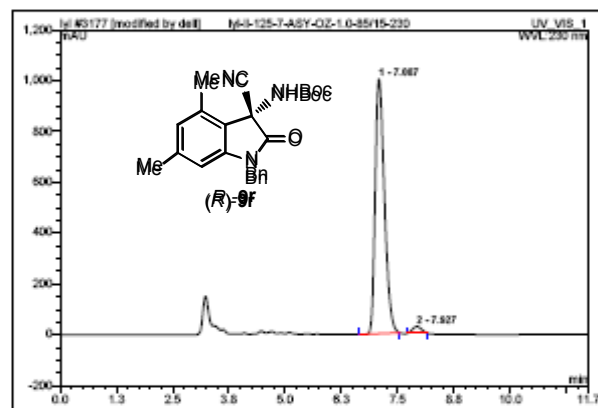

| No.    | Ret.Time min | Peak Name | Height mAU | Area mAU*min | Rel.Area % | Amount | Type |
|--------|--------------|-----------|------------|--------------|------------|--------|------|
| 1      | 7.09         | n.a.      | 1002.016   | 238.587      | 97.53      | n.a.   | BME* |
| 2      | 7.93         | n.a.      | 26.160     | 6.043        | 2.47       | n.a.   | BME* |
| Total: |              |           | 1028.177   | 244.629      | 100.00     | 0.000  |      |

default/integration

Chromleon (c) Dionex 1996-2005  
 Version 6.80 SR8a Build 2643 (158225)

Operator:deli Timebase:U-3000 Sequence:(j)

Page 1-1  
 2012-9-4 10:13

3278 Iyl-IM-021-1-RAC-OZ-1.0-85/15-230

|                  |                                   |                   |          |
|------------------|-----------------------------------|-------------------|----------|
| Sample Name:     | Iyl-IM-021-1-RAC-OZ-1.0-85/15-230 | Injection Volume: | 20.0     |
| Vial Number:     | 898                               | Channel:          | UV_VI8_1 |
| Sample Type:     | standard                          | Wavelength:       | 230      |
| Control Program: | Liu Yunlin                        | Bandwidth:        | n.a.     |
| Quantif. Method: | Iyl                               | Dilution Factor:  | 1.0000   |
| Recording Time:  | 2012-8-27 21:01                   | Sample Weight:    | 1.0000   |
| Run Time (min):  | 9.67                              | Sample Amount:    | 1.0000   |

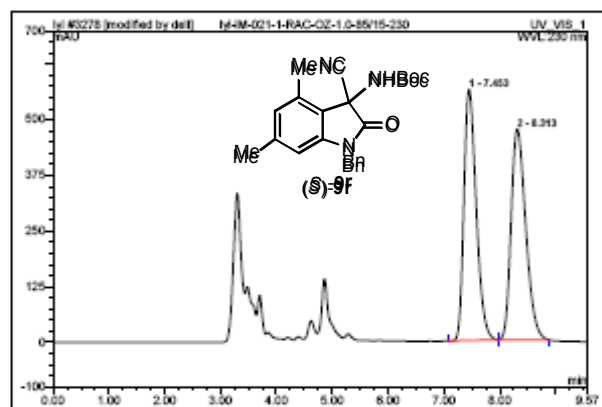

| No.    | Ret.Time min | Peak Name | Height mAU | Area mAU/min | Rel.Area % | Amount | Type |
|--------|--------------|-----------|------------|--------------|------------|--------|------|
| 1      | 7.45         | n.a.      | 565.102    | 143.671      | 49.58      | n.a.   | SMB* |
| 2      | 8.31         | n.a.      | 473.393    | 143.814      | 50.02      | n.a.   | SMB* |
| Total: |              |           | 1038.494   | 287.486      | 100.00     | 0.000  |      |

default/integration

Chromleon (c) Dionex 1996-2005  
 Version 6.80 SR8a Build 2643 (155225)

Operator:deli Timebase:U-3000 Sequence:(j)

Page 1-1  
 2012-9-4 10:12

3277 Iyl-IM-021-1-ASY-OZ-1.0-85/15-230

|                  |                                   |                   |          |
|------------------|-----------------------------------|-------------------|----------|
| Sample Name:     | Iyl-IM-021-1-ASY-OZ-1.0-85/15-230 | Injection Volume: | 20.0     |
| Vial Number:     | 898                               | Channel:          | UV_VI8_1 |
| Sample Type:     | standard                          | Wavelength:       | 230      |
| Control Program: | Liu Yunlin                        | Bandwidth:        | n.a.     |
| Quantif. Method: | Iyl                               | Dilution Factor:  | 1.0000   |
| Recording Time:  | 2012-8-27 20:47                   | Sample Weight:    | 1.0000   |
| Run Time (min):  | 11.68                             | Sample Amount:    | 1.0000   |

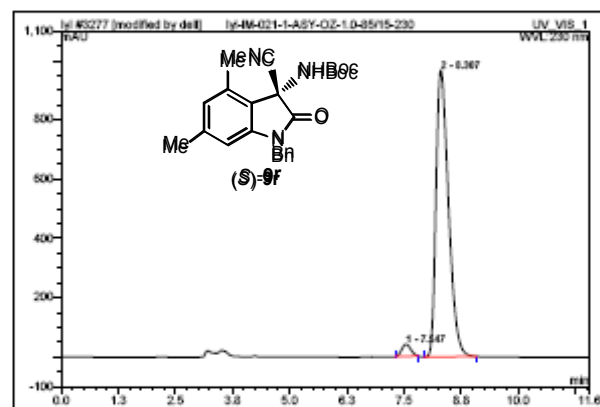

| No.    | Ret.Time min | Peak Name | Height mAU | Area mAU/min | Rel.Area % | Amount | Type |
|--------|--------------|-----------|------------|--------------|------------|--------|------|
| 1      | 7.55         | n.a.      | 40.576     | 9.320        | 2.96       | n.a.   | SMB* |
| 2      | 8.31         | n.a.      | 966.425    | 305.643      | 97.04      | n.a.   | SMB* |
| Total: |              |           | 1007.001   | 314.962      | 100.00     | 0.000  |      |

default/integration

Chromleon (c) Dionex 1996-2005  
 Version 6.80 SR8a Build 2643 (155225)

Operator:deli Timebase:U-3000 Sequence:(j)

Page 1-1  
 2012-9-6 6:31

3295 Iyl-IM-029-RAC-AD-1.0-85/15-230

|                  |                                 |                   |          |
|------------------|---------------------------------|-------------------|----------|
| Sample Name:     | Iyl-IM-029-RAC-AD-1.0-85/15-230 | Injection Volume: | 20.0     |
| Vial Number:     | 998                             | Channel:          | UV_Vi8_1 |
| Sample Type:     | standard                        | Wavelength:       | 290      |
| Control Program: | Liu Yunlin                      | Bandwidth:        | n.a.     |
| Quantif. Method: | Iyl                             | Dilution Factor:  | 1.0000   |
| Recording Time:  | 2012-8-2 21:10                  | Sample Weight:    | 1.0000   |
| Run Time (min):  | 20.27                           | Sample Amount:    | 1.0000   |

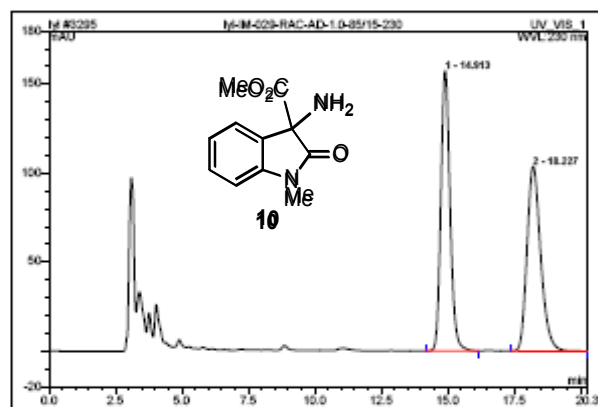

| No.    | RetTime min | Peak Name | Height mAU | Area mAU*min | Rel.Area % | Amount | Type |
|--------|-------------|-----------|------------|--------------|------------|--------|------|
| 1      | 14.91       | n.a.      | 157.553    | 63.164       | 50.42      | n.a.   | BMB  |
| 2      | 18.23       | n.a.      | 103.925    | 62.102       | 49.58      | n.a.   | BMB  |
| Total: |             |           | 261.482    | 125.266      | 100.00     | 0.000  |      |

default/integration

Chromleon (c) Dionex 1996-2005  
 Version 6.80 SR8a Build 2643 (156225)

Operator:deli Timebase:U-3000 Sequence:(j)

Page 1-1  
 2012-9-6 6:30

3294 Iyl-IM-029-ASY-AD-1.0-85/15-230

|                  |                                 |                   |          |
|------------------|---------------------------------|-------------------|----------|
| Sample Name:     | Iyl-IM-029-ASY-AD-1.0-85/15-230 | Injection Volume: | 20.0     |
| Vial Number:     | 998                             | Channel:          | UV_Vi8_1 |
| Sample Type:     | standard                        | Wavelength:       | 290      |
| Control Program: | Liu Yunlin                      | Bandwidth:        | n.a.     |
| Quantif. Method: | Iyl                             | Dilution Factor:  | 1.0000   |
| Recording Time:  | 2012-8-2 20:47                  | Sample Weight:    | 1.0000   |
| Run Time (min):  | 20.88                           | Sample Amount:    | 1.0000   |

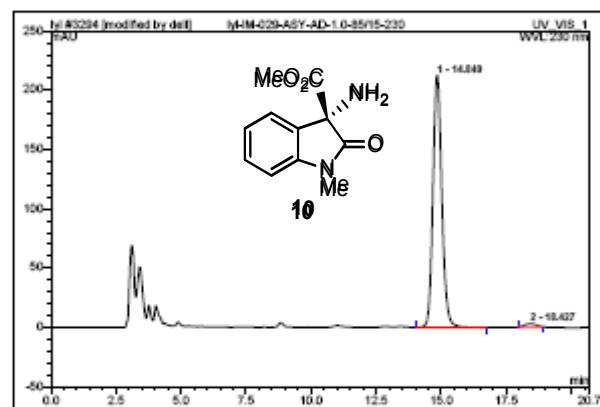

| No.    | RetTime min | Peak Name | Height mAU | Area mAU*min | Rel.Area % | Amount | Type |
|--------|-------------|-----------|------------|--------------|------------|--------|------|
| 1      | 14.84       | n.a.      | 212.788    | 84.264       | 98.41      | n.a.   | BMB  |
| 2      | 18.43       | n.a.      | 2.695      | 1.352        | 1.59       | n.a.   | BMB  |
| Total: |             |           | 215.483    | 85.626       | 100.00     | 0.000  |      |

default/integration

Chromleon (c) Dionex 1996-2005  
 Version 6.80 SR8a Build 2643 (156225)

Operator:deli Timebase:U-3000 Sequence:yl

Page 1-1  
 2012-9-4 10:29

3309 Iyl-IM-043-rac-AD-1.0-75/25-230

Sample Name: Iyl-IM-043-rac-AD-1.0-75/25-230 Injection Volume: 20.0  
 Vial Number: 998 Channel: UV\_Vi8\_1  
 Sample Type: standard Wavelength: 290  
 Control Program: Liu Yunlin Bandwidth: n.a.  
 Quantif. Method: Iyl Dilution Factor: 1.0000  
 Recording Time: 2012-8-4 10:21 Sample Weight: 1.0000  
 Run Time (min): 20.77 Sample Amount: 1.0000

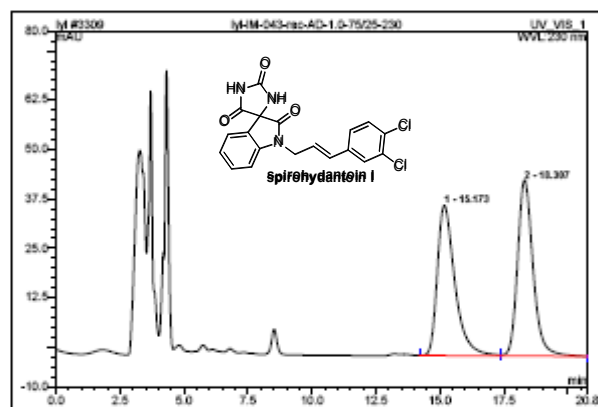

| No.    | RetTime min | Peak Name | Height mAU | Area mAU*min | Rel.Area % | Amount | Type |
|--------|-------------|-----------|------------|--------------|------------|--------|------|
| 1      | 15.17       | n.a       | 37.994     | 30.324       | 49.30      | n.a.   | BM   |
| 2      | 18.31       | n.a       | 44.499     | 31.188       | 50.70      | n.a.   | MB   |
| Total: |             |           | 82.492     | 61.512       | 100.00     | 0.000  |      |

default/integration

Chromleon (c) Dionex 1996-2005  
 Version 6.80 SR8a Build 2643 (156225)

Operator:deli Timebase:U-3000 Sequence:yl

Page 1-1  
 2012-9-4 10:30

3307 Iyl-IM-044-muye-ASY-AD-1.0-75/25-230

Sample Name: Iyl-IM-044-muye-ASY-AD-1.0-75/25-230 Injection Volume: 20.0  
 Vial Number: 998 Channel: UV\_Vi8\_1  
 Sample Type: standard Wavelength: 290  
 Control Program: Liu Yunlin Bandwidth: n.a.  
 Quantif. Method: Iyl Dilution Factor: 1.0000  
 Recording Time: 2012-8-4 9:38 Sample Weight: 1.0000  
 Run Time (min): 20.82 Sample Amount: 1.0000

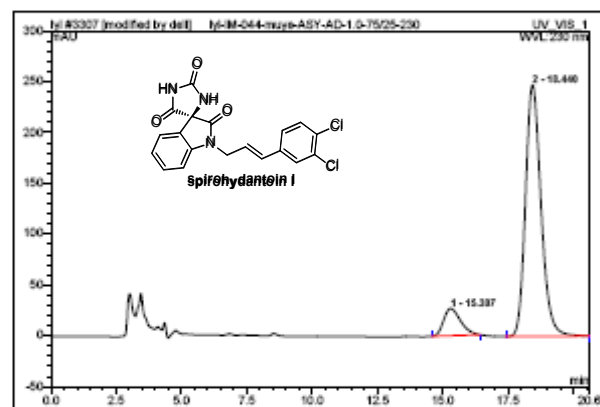

| No.    | RetTime min | Peak Name | Height mAU | Area mAU*min | Rel.Area % | Amount | Type |
|--------|-------------|-----------|------------|--------------|------------|--------|------|
| 1      | 15.31       | n.a       | 26.754     | 20.053       | 10.51      | n.a.   | BMB* |
| 2      | 18.44       | n.a       | 247.358    | 170.758      | 89.49      | n.a.   | BMB  |
| Total: |             |           | 274.112    | 190.811      | 100.00     | 0.000  |      |

default/integration

Chromleon (c) Dionex 1996-2005  
 Version 6.80 SR8a Build 2643 (156225)

Operator:elli Timebase:U-3000 Sequence:(j)

Page 1-1  
 2012-9-4 10:29

3309 Iyl-IM-043-rac-AD-1.0-75/25-230

|                  |                                 |                   |          |
|------------------|---------------------------------|-------------------|----------|
| Sample Name:     | Iyl-IM-043-rac-AD-1.0-75/25-230 | Injection Volume: | 20.0     |
| Vial Number:     | 998                             | Channel:          | UV_Vi8_1 |
| Sample Type:     | standard                        | Wavelength:       | 290      |
| Control Program: | Liu Yunlin                      | Bandwidth:        | n.a.     |
| Quantif. Method: | Iyl                             | Dilution Factor:  | 1.0000   |
| Recording Time:  | 2012-8-4 10:21                  | Sample Weight:    | 1.0000   |
| Run Time (min):  | 20.77                           | Sample Amount:    | 1.0000   |

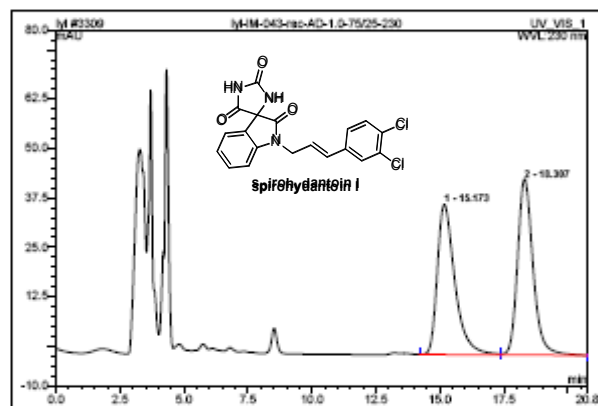

| No.    | RetTime min | Peak Name | Height mAU | Area mAU*min | Rel.Area % | Amount | Type |
|--------|-------------|-----------|------------|--------------|------------|--------|------|
| 1      | 15.17       | n.a.      | 37.994     | 30.324       | 49.30      | n.a.   | RM   |
| 2      | 18.31       | n.a.      | 44.499     | 31.188       | 50.70      | n.a.   | MB   |
| Total: |             |           | 82.492     | 61.512       | 100.00     | 0.000  |      |

default/integration

Chromleon (c) Dionex 1996-2005  
 Version 6.80 SR8a Build 2643 (156225)

Operator:elli Timebase:U-3000 Sequence:(j)

Page 1-1  
 2012-9-4 10:30

3306 Iyl-IM-043-muye-ASY-AD-1.0-75/25-230

|                  |                                      |                   |          |
|------------------|--------------------------------------|-------------------|----------|
| Sample Name:     | Iyl-IM-043-muye-ASY-AD-1.0-75/25-230 | Injection Volume: | 20.0     |
| Vial Number:     | 998                                  | Channel:          | UV_Vi8_1 |
| Sample Type:     | standard                             | Wavelength:       | 290      |
| Control Program: | Liu Yunlin                           | Bandwidth:        | n.a.     |
| Quantif. Method: | Iyl                                  | Dilution Factor:  | 1.0000   |
| Recording Time:  | 2012-8-4 8:15                        | Sample Weight:    | 1.0000   |
| Run Time (min):  | 21.06                                | Sample Amount:    | 1.0000   |

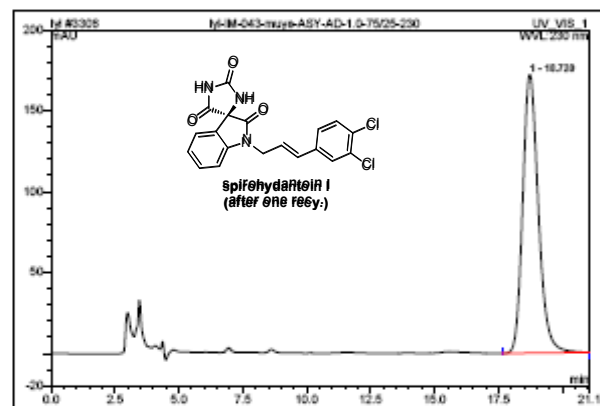

| No.    | RetTime min | Peak Name | Height mAU | Area mAU*min | Rel.Area % | Amount | Type |
|--------|-------------|-----------|------------|--------------|------------|--------|------|
| 1      | 18.72       | n.a.      | 172.294    | 121.990      | 100.00     | n.a.   | RM   |
| Total: |             |           | 172.294    | 121.990      | 100.00     | 0.000  |      |

default/integration

Chromleon (c) Dionex 1996-2005  
 Version 6.80 SR8a Build 2643 (156225)
